# Supplementary material for: Relativistic effects at the Cu2O2 core – a density functional theory study
Source: Royal Society of Chemistry journal article supplement (doi:10.1039/c7cp04686c), 2017-01-01
Supplement: c7cp04686c1.pdf [file c7cp04686c1.pdf]

# Relativistic effects at the Cu-O core – a density functional theory study - Supporting Information

|     |                                                                                                                                        |       |
|-----|----------------------------------------------------------------------------------------------------------------------------------------|-------|
| S1: | Cartesian Coordinates of <b>C1</b> , <b>C2</b> and <b>C3</b> for <b>O</b> and <b>P</b> core                                            | S.2   |
| S2: | Diagonal Matrix Elements of the relativistic non-relativistic Overlap<br>Difference $dS_{i,j}$ for <b>C1</b> , <b>C2</b> and <b>C3</b> | S. 8  |
| S3: | Charge Density Difference Plots for relevant MOs<br>for all Complexes                                                                  | S. 19 |
| S4: | Total Overlap Population for Cu and O and N-ligand fragments<br>for all Complexes                                                      | S. 28 |

S1. Cartesian Coordinates of **C1**, **C2** and **C3** for O and P core for the nonrelativistic minimum energy wave function, TPSSh/cc-pVTZ.

|           |    | <b>O</b>  |           |           | <b>P</b>  |           |           |
|-----------|----|-----------|-----------|-----------|-----------|-----------|-----------|
| Atoms     |    | x         | y         | z         | x         | y         | z         |
| <b>C1</b> | N  | -2.775837 | 1.337149  | -0.100573 | -3.184819 | 1.379334  | -0.112774 |
|           | C  | -4.076975 | 0.70109   | 0.28925   | -4.460585 | 0.702896  | 0.288366  |
|           | C  | -4.077043 | -0.701059 | -0.289052 | -4.460656 | -0.702874 | -0.288174 |
|           | N  | -2.775847 | -1.337151 | 0.100534  | -3.184817 | -1.379339 | 0.112692  |
|           | Cu | -1.357797 | -0.000007 | -0.000075 | -1.744335 | -0.000004 | -0.000091 |
|           | O  | 0         | 1.160158  | -0.080826 | 0.000001  | 0.733892  | -0.058881 |
|           | O  | 0         | -1.160164 | 0.080785  | -0.000001 | -0.733894 | 0.05885   |
|           | Cu | 1.357797  | 0.000001  | 0.000025  | 1.744335  | 0.000001  | 0.000043  |
|           | N  | 2.775843  | 1.337151  | -0.100513 | 3.184819  | 1.379338  | -0.112688 |
|           | C  | 4.077014  | 0.701071  | 0.289168  | 4.460631  | 0.70288   | 0.288273  |
|           | C  | 4.077006  | -0.701071 | -0.289153 | 4.46061   | -0.702888 | -0.28827  |
|           | N  | 2.775842  | -1.33715  | 0.100556  | 3.184817  | -1.379335 | 0.112772  |
|           | H  | -2.812358 | 1.692039  | -1.056904 | -3.261263 | 1.734551  | -1.06556  |
|           | H  | -2.555101 | 2.138664  | 0.489304  | -3.01795  | 2.195863  | 0.472061  |
|           | H  | -4.114286 | 0.677172  | 1.378811  | -4.48502  | 0.674313  | 1.378518  |
|           | H  | -4.921414 | 1.288847  | -0.07132  | -5.328946 | 1.264645  | -0.056662 |
|           | H  | -4.921429 | -1.288799 | 0.071667  | -5.328953 | -1.26461  | 0.057034  |
|           | H  | -4.114547 | -0.677138 | -1.378606 | -4.485321 | -0.674286 | -1.37832  |
|           | H  | -2.555235 | -2.138648 | -0.489415 | -3.01805  | -2.195818 | -0.472241 |
|           | H  | -2.812222 | -1.692091 | 1.056851  | -3.261091 | -1.734638 | 1.065461  |
|           | H  | 2.555171  | 2.138647  | 0.489414  | 3.018014  | 2.19583   | 0.472216  |
|           | H  | 2.812274  | 1.692076  | -1.056833 | 3.261155  | 1.734615  | -1.06546  |
|           | H  | 4.114435  | 0.677134  | 1.378724  | 4.485215  | 0.674291  | 1.378422  |
|           | H  | 4.921423  | 1.288823  | -0.071479 | 5.328952  | 1.264621  | -0.05687  |
|           | H  | 4.114404  | -0.677135 | -1.37871  | 4.485126  | -0.674302 | -1.37842  |
|           | H  | 4.921422  | -1.288825 | 0.071475  | 5.328948  | -1.264634 | 0.05682   |
|           | H  | 2.812297  | -1.692077 | 1.056874  | 3.2612    | -1.734578 | 1.065553  |
|           | H  | 2.555154  | -2.138643 | -0.489369 | 3.017986  | -2.195848 | -0.472096 |
| <b>C2</b> | Cu | -0.000083 | -1.389177 | 0.019945  | 0.000711  | 1.771715  | -0.00327  |
|           | Cu | 0.00002   | 1.389134  | -0.019941 | -0.000711 | -1.771716 | 0.003269  |
|           | O  | 1.157132  | -0.00007  | 0.000084  | 0.745622  | -0.0003   | -0.000006 |
|           | O  | -1.157212 | 0.000019  | 0.000046  | -0.745621 | 0.000301  | 0.00001   |
|           | N  | 1.432183  | -2.69069  | 0.100266  | 1.497432  | 3.001141  | -0.092462 |
|           | N  | 2.81102   | -1.823489 | -1.572846 | 2.87104   | 1.960321  | 1.469527  |
|           | N  | 3.778457  | -2.825152 | 0.271195  | 3.844493  | 3.143154  | -0.274254 |
|           | N  | -1.432434 | -2.690651 | 0.100402  | -1.49505  | 3.002309  | -0.092425 |
|           | N  | -2.811276 | -1.82322  | -1.572605 | -2.869455 | 1.962513  | 1.469542  |
|           | N  | -3.778719 | -2.825079 | 0.271323  | -3.842004 | 3.14609   | -0.274235 |
|           | N  | -1.432207 | 2.690726  | -0.1002   | -1.497433 | -3.00114  | 0.092464  |
|           | N  | -2.810981 | 1.823352  | 1.57289   | -2.871041 | -1.960321 | -1.469526 |
|           | N  | -3.778481 | 2.825309  | -0.270965 | -3.844495 | -3.143155 | 0.274255  |

|   |           |           |           |           |           |           |
|---|-----------|-----------|-----------|-----------|-----------|-----------|
| N | 1.432339  | 2.690601  | -0.100403 | 1.495051  | -3.00231  | 0.092423  |
| N | 2.811308  | 1.823171  | 1.572454  | 2.869455  | -1.962513 | -1.469544 |
| N | 3.778593  | 2.824965  | -0.271617 | 3.842006  | -3.14609  | 0.274233  |
| C | 1.260294  | -3.892518 | 0.92501   | 1.286151  | 4.265256  | -0.810921 |
| C | -0.000112 | -4.651965 | 0.549346  | 0.001948  | 4.959604  | -0.364307 |
| C | -1.260543 | -3.892575 | 0.925019  | -1.282809 | 4.266261  | -0.810886 |
| C | 2.645911  | -2.43191  | -0.375504 | 2.711584  | 2.706142  | 0.343069  |
| C | 3.88558   | -0.870327 | -1.810559 | 3.946757  | 0.990304  | 1.618326  |
| C | 1.760012  | -1.816717 | -2.573864 | 1.842872  | 1.902083  | 2.496164  |
| C | 4.953948  | -3.32216  | -0.442475 | 5.035206  | 3.557619  | 0.464637  |
| C | 3.867073  | -2.862378 | 1.724804  | 3.917376  | 3.275877  | -1.724418 |
| C | -2.646165 | -2.431776 | -0.375307 | -2.709427 | 2.70822   | 0.343089  |
| C | -1.760336 | -1.816549 | -2.573686 | -1.841342 | 1.903504  | 2.49619   |
| C | -3.8854   | -0.869478 | -1.809941 | -3.945863 | 0.993256  | 1.618291  |
| C | -3.867471 | -2.862426 | 1.724924  | -3.914785 | 3.278891  | -1.724397 |
| C | -4.954327 | -3.321721 | -0.442405 | -5.032418 | 3.561415  | 0.464653  |
| C | -1.260375 | 3.892667  | -0.9248   | -1.286151 | -4.265254 | 0.810924  |
| C | 0.000133  | 4.651995  | -0.549241 | -0.001949 | -4.959603 | 0.364308  |
| C | 1.260447  | 3.892482  | -0.925074 | 1.28281   | -4.266262 | 0.810885  |
| C | -2.645924 | 2.431898  | 0.375597  | -2.711585 | -2.706142 | -0.343067 |
| C | -3.885248 | 0.869815  | 1.810402  | -3.946759 | -0.990305 | -1.618324 |
| C | -1.759867 | 1.816453  | 2.573806  | -1.842872 | -1.902081 | -2.496162 |
| C | -4.953981 | 3.322111  | 0.442831  | -5.035206 | -3.557622 | -0.464636 |
| C | -3.867219 | 2.86281   | -1.724563 | -3.917379 | -3.275877 | 1.724419  |
| C | 2.646129  | 2.431732  | 0.375208  | 2.709429  | -2.70822  | -0.343091 |
| C | 1.760523  | 1.816573  | 2.573706  | 1.841342  | -1.903505 | -2.496192 |
| C | 3.885988  | 0.870156  | 1.810109  | 3.945862  | -0.993254 | -1.618293 |
| C | 3.867084  | 2.862109  | -1.725242 | 3.914787  | -3.278891 | 1.724395  |
| C | 4.954196  | 3.321958  | 0.441866  | 5.03242   | -3.561413 | -0.464655 |
| H | 1.215568  | -3.639608 | 1.990667  | 1.239198  | 4.097953  | -1.893218 |
| H | 2.126402  | -4.539317 | 0.777876  | 2.133103  | 4.928314  | -0.621197 |
| H | -0.000094 | -4.882578 | -0.518619 | 0.002011  | 5.080134  | 0.722104  |
| H | -0.000094 | -5.599674 | 1.093797  | 0.002335  | 5.961634  | -0.801699 |
| H | -2.126644 | -4.53936  | 0.777791  | -2.129239 | 4.929978  | -0.621132 |
| H | -1.215853 | -3.639776 | 1.990704  | -1.236018 | 4.09893   | -1.893185 |
| H | 4.518443  | -0.800584 | -0.931437 | 4.581974  | 1.008162  | 0.738139  |
| H | 3.443152  | 0.107945  | -2.004949 | 3.515049  | -0.00943  | 1.724191  |
| H | 4.48973   | -1.167706 | -2.670254 | 4.551111  | 1.206252  | 2.502311  |
| H | 1.118488  | -2.680752 | -2.423538 | 1.2132    | 2.78531   | 2.422814  |
| H | 2.219294  | -1.876806 | -3.562294 | 2.325852  | 1.886783  | 3.475533  |
| H | 1.167668  | -0.89926  | -2.511416 | 1.229452  | 1.001123  | 2.394762  |
| H | 4.718343  | -3.440291 | -1.496714 | 4.817604  | 3.572457  | 1.529392  |
| H | 5.23269   | -4.29433  | -0.029889 | 5.316704  | 4.564664  | 0.148828  |
| H | 5.805191  | -2.644998 | -0.334132 | 5.879213  | 2.888906  | 0.274984  |
| H | 3.018369  | -2.337827 | 2.155188  | 3.073552  | 2.76123   | -2.177911 |
| H | 4.788731  | -2.364026 | 2.034436  | 4.844045  | 2.813292  | -2.072696 |
| H | 3.888845  | -3.88712  | 2.10464   | 3.915439  | 4.32142   | -2.042541 |

|           |           |           |           |           |           |           |
|-----------|-----------|-----------|-----------|-----------|-----------|-----------|
| H         | -1.167896 | -0.899145 | -2.511304 | -1.228572 | 1.002104  | 2.394775  |
| H         | -2.219689 | -1.876604 | -3.56209  | -2.324347 | 1.888528  | 3.475552  |
| H         | -1.118885 | -2.68064  | -2.423395 | -1.211031 | 2.786277  | 2.422872  |
| H         | -4.518827 | -0.800495 | -0.931169 | -4.581074 | 1.01162   | 0.738111  |
| H         | -4.489056 | -1.165816 | -2.670336 | -4.550055 | 1.209583  | 2.502293  |
| H         | -3.442567 | 0.108885  | -2.002982 | -3.514867 | -0.006793 | 1.724091  |
| H         | -3.018691 | -2.33814  | 2.155478  | -3.07134  | 2.763631  | -2.177899 |
| H         | -3.889544 | -3.887209 | 2.10463   | -3.912079 | 4.324437  | -2.042502 |
| H         | -4.789036 | -2.363877 | 2.034524  | -4.841794 | 2.816995  | -2.072685 |
| H         | -5.805502 | -2.644539 | -0.333639 | -5.876916 | 2.893331  | 0.274972  |
| H         | -5.233084 | -4.294043 | -0.030183 | -5.31317  | 4.568676  | 0.148869  |
| H         | -4.718877 | -3.439408 | -1.496726 | -4.814817 | 3.57606   | 1.529412  |
| H         | -1.215813 | 3.63991   | -1.990502 | -1.239195 | -4.09795  | 1.893221  |
| H         | -2.126439 | 4.539474  | -0.77745  | -2.133103 | -4.928312 | 0.621202  |
| H         | 0.000272  | 4.882553  | 0.518736  | -0.002014 | -5.080135 | -0.722103 |
| H         | 0.000131  | 5.59973   | -1.093645 | -0.002336 | -5.961634 | 0.801701  |
| H         | 2.12663   | 4.539197  | -0.778017 | 2.129239  | -4.92998  | 0.621129  |
| H         | 1.21558   | 3.639625  | -1.990741 | 1.236021  | -4.09893  | 1.893184  |
| H         | -4.518845 | 0.800958  | 0.931743  | -4.581976 | -1.008164 | -0.738138 |
| H         | -3.44258  | -0.108638 | 2.003367  | -3.515051 | 0.009429  | -1.72419  |
| H         | -4.488693 | 1.166275  | 2.670903  | -4.551112 | -1.206253 | -2.502309 |
| H         | -1.118581 | 2.680714  | 2.42376   | -1.2132   | -2.785308 | -2.422812 |
| H         | -2.219097 | 1.876045  | 3.562288  | -2.325851 | -1.886781 | -3.475531 |
| H         | -1.167301 | 0.899166  | 2.510974  | -1.229453 | -1.001121 | -2.394758 |
| H         | -4.718486 | 3.439658  | 1.497157  | -4.817603 | -3.572458 | -1.529392 |
| H         | -5.232567 | 4.294523  | 0.030706  | -5.316703 | -4.564668 | -0.148829 |
| H         | -5.805286 | 2.645099  | 0.334024  | -5.879214 | -2.88891  | -0.274984 |
| H         | -3.018483 | 2.338476  | -2.155151 | -3.073554 | -2.761232 | 2.177913  |
| H         | -4.788832 | 2.364386  | -2.034221 | -4.844047 | -2.813291 | 2.072696  |
| H         | -3.889174 | 3.887632  | -2.104169 | -3.915444 | -4.32142  | 2.042542  |
| H         | 1.16834   | 0.898984  | 2.511698  | 1.22857   | -1.002105 | -2.394775 |
| H         | 2.219978  | 1.8771    | 3.562035  | 2.324346  | -1.888526 | -3.475554 |
| H         | 1.118801  | 2.680417  | 2.423171  | 1.211032  | -2.786279 | -2.422874 |
| H         | 4.518688  | 0.800325  | 0.930875  | 4.581075  | -1.01162  | -0.738114 |
| H         | 4.49029   | 1.167696  | 2.669645  | 4.550051  | -1.209579 | -2.502297 |
| H         | 3.443698  | -0.108129 | 2.004739  | 3.514864  | 0.006795  | -1.724089 |
| H         | 3.018232  | 2.337733  | -2.155547 | 3.071343  | -2.763631 | 2.177898  |
| H         | 3.889043  | 3.886841  | -2.105093 | 3.912079  | -4.324438 | 2.0425    |
| H         | 4.788614  | 2.363557  | -2.034939 | 4.841796  | -2.816996 | 2.072683  |
| H         | 4.71888   | 3.439772  | 1.496203  | 4.814818  | -3.576061 | -1.529414 |
| H         | 5.805501  | 2.644944  | 0.333081  | 5.876917  | -2.893327 | -0.274976 |
| H         | 5.232686  | 4.294289  | 0.029482  | 5.313174  | -4.568673 | -0.148869 |
| <b>C3</b> |           |           |           |           |           |           |
| Cu        | -1.274357 | -0.294276 | -0.281801 | 1.692894  | -0.063081 | -0.097938 |
| Cu        | 1.365385  | 0.499736  | 0.421588  | -1.769658 | 0.089026  | 0.126979  |
| O         | -0.110026 | -0.265432 | 1.081055  | 0.030557  | 0.800689  | 0.302145  |
| O         | 0.118164  | 0.697408  | -0.874873 | -0.047646 | -0.577831 | 0.739775  |
| N         | -4.39051  | 0.551835  | -0.078311 | 4.139069  | -1.071125 | -1.074679 |

|   |           |           |           |           |           |           |
|---|-----------|-----------|-----------|-----------|-----------|-----------|
| N | -3.275151 | 1.213681  | 0.328045  | 2.986503  | -1.51788  | -0.498869 |
| N | -3.726657 | -1.748101 | -0.187067 | 4.417896  | 0.992751  | 0.093875  |
| N | -2.503745 | -1.699938 | 0.41762   | 3.28443   | 1.026287  | 0.845335  |
| N | 2.790338  | -1.413935 | -0.637719 | -3.281882 | -1.091016 | 0.671599  |
| N | 3.972042  | -1.399135 | 0.031333  | -4.29644  | -1.161486 | -0.232037 |
| N | 2.927416  | 1.510182  | -0.22434  | -3.051554 | 1.475979  | -0.516062 |
| N | 4.149032  | 0.985534  | 0.090379  | -4.08115  | 0.978412  | -1.255318 |
| C | -4.269215 | -0.610816 | -0.918949 | 4.408287  | 0.35423   | -1.207682 |
| C | -3.721583 | 2.181292  | 1.138135  | 3.127496  | -2.847282 | -0.350038 |
| C | -5.132176 | 2.119309  | 1.252096  | 4.384521  | -3.239111 | -0.850985 |
| C | -5.525798 | 1.065665  | 0.468978  | 5.001749  | -2.091995 | -1.286321 |
| C | -2.795937 | 3.214963  | 1.734537  | 3.627152  | 1.60617   | 2.004047  |
| C | -2.442464 | -2.785536 | 1.229268  | 4.998273  | 1.944794  | 1.978435  |
| C | -3.64113  | -3.513606 | 1.104022  | 5.470775  | 1.535207  | 0.756259  |
| C | -4.430683 | -2.825019 | 0.220675  | -4.207218 | -0.451342 | -1.496556 |
| C | -1.33733  | -3.112948 | 2.213923  | -4.946239 | 1.959417  | -1.603262 |
| C | 4.307288  | -0.249645 | 0.841958  | -4.456844 | 3.131873  | -1.079818 |
| C | 5.142732  | 1.748094  | -0.416978 | -3.272474 | 2.79608   | -0.394244 |
| C | 4.555558  | 2.803918  | -1.066602 | -5.347617 | -1.850946 | 0.272087  |
| C | 3.164695  | 2.635549  | -0.928246 | -4.996416 | -2.247025 | 1.539949  |
| C | 2.088968  | 3.557551  | -1.449284 | -3.698016 | -1.746733 | 1.766887  |
| C | 4.830396  | -2.357742 | -0.415755 | 5.416595  | 0.435993  | -1.604846 |
| C | 4.166264  | -3.041366 | -1.400599 | 4.788719  | -4.234996 | -0.881243 |
| C | 2.905055  | -2.409206 | -1.525652 | 5.56643   | 2.423177  | 2.756307  |
| C | 1.858965  | -2.651005 | -2.590571 | -5.162346 | -0.592676 | -1.995523 |
| H | -5.275237 | -0.902978 | -1.208662 | -4.902767 | 4.106527  | -1.166233 |
| H | -5.773085 | 2.765428  | 1.825634  | -5.600756 | -2.817413 | 2.222457  |
| H | -3.894596 | -4.426854 | 1.610264  | 3.446355  | 1.040621  | -2.157374 |
| H | 5.367789  | -0.328087 | 1.067346  | 3.90727   | 1.761683  | -3.247985 |
| H | 5.060537  | 3.610918  | -1.565858 | 2.142561  | 0.944268  | -1.861755 |
| H | 4.540595  | -3.877495 | -1.964553 | 2.981328  | 2.412219  | -4.057545 |
| C | -3.47243  | -0.322524 | -2.165232 | 4.9673    | 1.820103  | -3.458865 |
| C | -4.098345 | -0.174498 | -3.392033 | 1.252256  | 1.578539  | -2.63458  |
| N | -2.143942 | -0.201571 | -2.033666 | 1.631628  | 2.322001  | -3.742677 |
| C | -3.327488 | 0.106568  | -4.514589 | 0.215909  | 1.483723  | -2.338867 |
| H | -5.17329  | -0.275534 | -3.464417 | 0.881101  | 2.819986  | -4.341284 |
| C | -1.394275 | 0.07135   | -3.110587 | -3.100954 | -0.993042 | -2.384943 |
| C | -1.952785 | 0.22959   | -4.368525 | -3.404122 | -1.619357 | -3.585181 |
| H | -3.795241 | 0.224806  | -5.483496 | -1.847591 | -0.842408 | -1.940215 |
| C | 3.55511   | -0.184455 | 2.151446  | -2.358218 | -2.113101 | -4.359139 |
| C | 4.180316  | -0.487444 | 3.350235  | -4.431539 | -1.723141 | -3.91045  |
| N | 2.269467  | 0.190529  | 2.11182   | -0.848296 | -1.321412 | -2.685971 |
| C | 3.45711   | -0.385546 | 4.533985  | -1.056405 | -1.961579 | -3.900942 |
| H | 5.218371  | -0.793094 | 3.356277  | 0.149541  | -1.1914   | -2.285962 |
| C | 1.563396  | 0.298131  | 3.247236  | -0.214955 | -2.334584 | -4.469186 |
| C | 2.130829  | 0.02165   | 4.480527  | 5.972323  | -1.920956 | -1.722633 |
| H | 3.927869  | -0.61222  | 5.481939  | 6.450373  | 1.586732  | 0.309534  |

|   |           |           |           |           |           |           |
|---|-----------|-----------|-----------|-----------|-----------|-----------|
| H | -6.496473 | 0.64945   | 0.252891  | -6.245332 | -2.003105 | -0.304573 |
| H | -5.43035  | -3.004336 | -0.140087 | -5.828478 | 1.74635   | -2.18455  |
| H | 5.818503  | -2.471127 | 0.000281  | -2.560461 | -2.608048 | -5.30027  |
| H | 6.17657   | 1.481931  | -0.268952 | 3.31202   | 2.98334   | -4.915458 |
| C | 0.461936  | -2.770657 | -1.97266  | 2.626966  | 1.840005  | 3.111677  |
| H | -0.290005 | -2.840092 | -2.761759 | 3.350018  | 2.365374  | 4.358724  |
| H | 0.384281  | -3.659828 | -1.348239 | 3.842208  | 3.320463  | 4.164562  |
| H | 0.245913  | -1.898132 | -1.3542   | 2.624755  | 2.522918  | 5.158182  |
| C | 1.904485  | -1.442522 | -3.548627 | 4.096896  | 1.654463  | 4.718012  |
| H | 1.712923  | -0.516955 | -3.002575 | 1.909961  | 0.523753  | 3.459016  |
| H | 2.884526  | -1.359313 | -4.021574 | 1.333521  | 0.143427  | 2.615184  |
| H | 1.157165  | -1.561708 | -4.337015 | 2.624362  | -0.241585 | 3.768155  |
| C | 2.176379  | -3.931695 | -3.372374 | 1.215982  | 0.695573  | 4.284247  |
| H | 2.191545  | -4.804804 | -2.716928 | 1.597762  | 2.884544  | 2.640188  |
| H | 1.411304  | -4.094963 | -4.133323 | 0.879084  | 3.073806  | 3.440227  |
| H | 3.139135  | -3.862413 | -3.881895 | 2.086774  | 3.828261  | 2.390316  |
| C | 0.021763  | -3.32886  | 1.531042  | 1.05493   | 2.526085  | 1.766134  |
| H | 0.767685  | -3.553943 | 2.296688  | 2.087841  | -3.717439 | 0.31655   |
| H | -0.025219 | -4.181873 | 0.852499  | 1.918915  | -3.251134 | 1.775578  |
| H | 0.349109  | -2.450017 | 0.983491  | 2.869321  | -3.302544 | 2.30952   |
| C | -1.272775 | -1.974572 | 3.250387  | 1.547406  | -2.227322 | 1.829343  |
| H | -1.050868 | -1.023272 | 2.766757  | 1.205479  | -3.899838 | 2.28584   |
| H | -2.221692 | -1.883195 | 3.782542  | 2.561303  | -5.177486 | 0.310031  |
| H | -0.490133 | -2.194321 | 3.980034  | 3.498137  | -5.297755 | 0.857163  |
| C | -1.695297 | -4.410439 | 2.959977  | 1.81017   | -5.800596 | 0.796987  |
| H | -1.7742   | -5.259463 | 2.278231  | 2.69889   | -5.551162 | -0.706782 |
| H | -0.902817 | -4.631994 | 3.675869  | 0.748724  | -3.623603 | -0.433533 |
| H | -2.62862  | -4.315638 | 3.517634  | 0.863233  | -3.934051 | -1.474374 |
| C | -2.427483 | 4.213292  | 0.618875  | 0.019182  | -4.283584 | 0.039117  |
| H | -3.319053 | 4.716333  | 0.240359  | 0.349648  | -2.610062 | -0.406264 |
| H | -1.746355 | 4.973353  | 1.007617  | -2.842671 | -1.887758 | 3.003698  |
| H | -1.943627 | 3.6978    | -0.21163  | -2.285055 | -0.516555 | 3.423819  |
| C | -1.524496 | 2.545752  | 2.27379   | -1.601952 | -0.112273 | 2.674306  |
| H | -1.770836 | 1.835021  | 3.06674   | -3.08918  | 0.2013    | 3.593752  |
| H | -1.001317 | 2.006972  | 1.485137  | -1.720028 | -0.62464  | 4.351196  |
| H | -0.856632 | 3.306163  | 2.684832  | -3.688792 | -2.458513 | 4.149959  |
| C | -3.499946 | 3.962207  | 2.874759  | -4.069845 | -3.453152 | 3.910582  |
| H | -2.815698 | 4.692856  | 3.309256  | -3.070756 | -2.547852 | 5.044166  |
| H | -4.376655 | 4.505601  | 2.517933  | -4.53295  | -1.808061 | 4.387259  |
| H | -3.813883 | 3.278393  | 3.666231  | -1.682089 | -2.852514 | 2.696466  |
| C | 1.381701  | 2.894373  | -2.646042 | -1.054276 | -2.962227 | 3.582723  |
| H | 2.092837  | 2.661602  | -3.441001 | -2.058888 | -3.838684 | 2.418286  |
| H | 0.88538   | 1.975669  | -2.329231 | -1.064737 | -2.471557 | 1.884192  |
| H | 0.627919  | 3.576081  | -3.045305 | -2.357177 | 3.710771  | 0.385894  |
| C | 1.078518  | 3.870216  | -0.335372 | -2.112698 | 3.128658  | 1.788818  |
| H | 1.576075  | 4.298901  | 0.536733  | -3.055089 | 2.978653  | 2.318149  |
| H | 0.351518  | 4.595473  | -0.702036 | -1.580236 | 2.177384  | 1.744604  |

|   |           |          |           |           |          |           |
|---|-----------|----------|-----------|-----------|----------|-----------|
| H | 0.529317  | 2.978692 | -0.032734 | -1.500676 | 3.821223 | 2.368146  |
| C | 2.731424  | 4.871924 | -1.920441 | -1.021925 | 3.864845 | -0.367577 |
| H | 1.947251  | 5.544997 | -2.268721 | -1.184863 | 4.282704 | -1.363285 |
| H | 3.267902  | 5.370026 | -1.110556 | -0.366426 | 4.541371 | 0.183637  |
| H | 3.420277  | 4.709853 | -2.751497 | -0.513604 | 2.906094 | -0.465697 |
| H | -0.334919 | 0.16535  | -2.9269   | -3.013234 | 5.091766 | 0.525175  |
| H | -1.311199 | 0.444941 | -5.21174  | -2.358602 | 5.744263 | 1.104164  |
| H | 0.533595  | 0.603468 | 3.134494  | -3.17344  | 5.561058 | -0.447544 |
| H | 1.535632  | 0.128132 | 5.376837  | -3.970879 | 5.028803 | 1.045345  |

S2. Diagonal Matrix Elements of the relativistic non-relativistic Overlap Difference  $dS_{ij}$  for C1, C2 and C3

|    | MO <sub>i</sub> | O                |                                     |                                 | P                |                                     |                                 |
|----|-----------------|------------------|-------------------------------------|---------------------------------|------------------|-------------------------------------|---------------------------------|
|    |                 | dS <sub>ii</sub> | S <sub>ii</sub> <sup>(nr-DKH)</sup> | S <sub>ii</sub> <sup>(nr)</sup> | dS <sub>ii</sub> | S <sub>ii</sub> <sup>(nr-DKH)</sup> | S <sub>ii</sub> <sup>(nr)</sup> |
| C1 | 1               | 0.63             | -0.37                               | 1.00                            | 0.32             | -0.68                               | 1.00                            |
|    | 2               | 0.26             | 0.74                                | 1.00                            | 0.06             | 0.94                                | 1.00                            |
|    | 3               | 0.05             | 0.95                                | 1.00                            | 0.00             | -1.00                               | 1.00                            |
|    | 4               | 0.05             | -0.95                               | 1.00                            | 0.00             | 1.00                                | 1.00                            |
|    | 5               | 0.52             | 0.48                                | 1.00                            | 0.00             | 1.00                                | 1.00                            |
|    | 6               | 0.62             | -0.38                               | 1.00                            | 0.00             | -1.00                               | 1.00                            |
|    | 7               | 0.27             | 0.73                                | 1.00                            | 0.02             | -0.98                               | 1.00                            |
|    | 8               | 0.25             | -0.75                               | 1.00                            | 0.03             | 0.97                                | 1.00                            |
|    | 9               | 0.35             | -0.65                               | 1.00                            | 0.12             | -0.88                               | 1.00                            |
|    | 10              | 0.32             | 0.68                                | 1.00                            | 0.11             | 0.89                                | 1.00                            |
|    | 11              | 0.00             | 1.00                                | 1.00                            | 0.00             | 1.00                                | 1.00                            |
|    | 12              | 0.00             | 1.00                                | 1.00                            | 0.00             | 1.00                                | 1.00                            |
|    | 13              | 0.15             | -0.85                               | 1.00                            | 0.02             | -0.98                               | 1.00                            |
|    | 14              | 0.30             | 0.70                                | 1.00                            | 0.02             | 0.98                                | 1.00                            |
|    | 15              | 0.35             | 0.65                                | 1.00                            | 0.03             | -0.97                               | 1.00                            |
|    | 16              | 0.22             | 0.78                                | 1.00                            | 0.03             | 0.97                                | 1.00                            |
|    | 17              | 0.16             | -0.84                               | 1.00                            | 0.01             | -0.99                               | 1.00                            |
|    | 18              | 0.16             | 0.84                                | 1.00                            | 0.01             | 0.99                                | 1.00                            |
|    | 19              | 0.05             | 0.95                                | 1.00                            | 0.02             | 0.98                                | 1.00                            |
|    | 20              | 0.05             | -0.95                               | 1.00                            | 0.02             | -0.98                               | 1.00                            |
|    | 21              | 0.00             | 1.00                                | 1.00                            | 0.01             | -0.99                               | 1.00                            |
|    | 22              | 0.00             | -1.00                               | 1.00                            | 0.01             | 0.99                                | 1.00                            |
|    | 23              | 0.00             | -1.00                               | 1.00                            | 0.00             | -1.00                               | 1.00                            |
|    | 24              | 0.00             | 1.00                                | 1.00                            | 0.00             | 1.00                                | 1.00                            |
|    | 25              | 0.00             | 1.00                                | 1.00                            | 0.00             | 1.00                                | 1.00                            |
|    | 26              | 0.00             | -1.00                               | 1.00                            | 0.00             | -1.00                               | 1.00                            |
|    | 27              | 0.00             | 1.00                                | 1.00                            | 0.72             | -0.28                               | 1.00                            |
|    | 28              | 0.00             | -1.00                               | 1.00                            | 0.71             | 0.29                                | 1.00                            |
|    | 29              | 0.00             | 1.00                                | 1.00                            | 0.00             | 1.00                                | 1.00                            |
|    | 30              | 0.00             | 1.00                                | 1.00                            | 0.00             | -1.00                               | 1.00                            |
|    | 31              | 0.00             | 1.00                                | 1.00                            | 0.00             | 1.00                                | 1.00                            |
|    | 32              | 0.00             | 1.00                                | 1.00                            | 0.00             | 1.00                                | 1.00                            |
|    | 33              | 0.00             | 1.00                                | 1.00                            | 0.00             | -1.00                               | 1.00                            |
|    | 34              | 0.00             | 1.00                                | 1.00                            | 0.00             | 1.00                                | 1.00                            |
|    | 35              | 0.00             | 1.00                                | 1.00                            | 0.00             | -1.00                               | 1.00                            |
|    | 36              | 0.00             | 1.00                                | 1.00                            | 0.00             | 1.00                                | 1.00                            |
|    | 37              | 0.00             | 1.00                                | 1.00                            | 0.87             | -0.13                               | 1.00                            |
|    | 38              | 0.00             | 1.00                                | 1.00                            | 0.87             | 0.13                                | 1.00                            |
|    | 39              | 0.00             | 1.00                                | 1.00                            | 0.95             | -0.05                               | 1.00                            |
|    | 40              | 0.00             | 1.00                                | 1.00                            | 0.95             | 0.05                                | 1.00                            |
|    | 41              | 0.00             | 1.00                                | 1.00                            | 0.00             | 1.00                                | 1.00                            |



|           |      |       |      |      |       |      |
|-----------|------|-------|------|------|-------|------|
| 42        | 0.00 | 1.00  | 1.00 | 0.00 | -1.00 | 1.00 |
| 43        | 0.00 | 1.00  | 1.00 | 0.00 | 1.00  | 1.00 |
| 44        | 0.00 | 1.00  | 1.00 | 0.00 | -1.00 | 1.00 |
| 45        | 0.00 | -1.00 | 1.00 | 0.00 | 1.00  | 1.00 |
| 46        | 0.00 | 1.00  | 1.00 | 0.00 | 1.00  | 1.00 |
| 47        | 0.00 | 1.00  | 1.00 | 0.00 | -1.00 | 1.00 |
| 48        | 0.00 | 1.00  | 1.00 | 0.00 | 1.00  | 1.00 |
| 49        | 0.00 | 1.00  | 1.00 | 0.00 | 1.00  | 1.00 |
| 50        | 0.01 | 0.99  | 1.00 | 0.00 | 1.00  | 1.00 |
| 51        | 0.01 | 0.99  | 1.00 | 0.00 | 1.00  | 1.00 |
| 52        | 0.00 | 1.00  | 1.00 | 0.00 | -1.00 | 1.00 |
| 53        | 0.00 | 1.00  | 1.00 | 0.00 | 1.00  | 1.00 |
| 54        | 0.00 | -1.00 | 1.00 | 0.00 | 1.00  | 1.00 |
| 55        | 0.00 | 1.00  | 1.00 | 0.00 | 1.00  | 1.00 |
| 56        | 0.01 | 0.99  | 1.00 | 0.00 | 1.00  | 1.00 |
| 57        | 0.12 | -0.88 | 1.00 | 0.00 | 1.00  | 1.00 |
| 58        | 0.12 | 0.88  | 1.00 | 0.00 | -1.00 | 1.00 |
| 59        | 0.01 | -0.99 | 1.00 | 0.00 | -1.00 | 1.00 |
| 60        | 0.01 | 0.99  | 1.00 | 0.00 | 1.00  | 1.00 |
| 61        | 0.02 | 0.98  | 1.00 | 0.00 | 1.00  | 1.00 |
| 62        | 0.02 | 0.98  | 1.00 | 0.00 | 1.00  | 1.00 |
| 63        | 0.00 | -1.00 | 1.00 | 0.08 | 0.92  | 1.00 |
| 64        | 0.00 | 1.00  | 1.00 | 0.08 | -0.92 | 1.00 |
| 65        | 0.00 | -1.00 | 1.00 | 0.00 | 1.00  | 1.00 |
| 66        | 0.00 | 1.00  | 1.00 | 0.00 | 1.00  | 1.00 |
| 67        | 0.00 | -1.00 | 1.00 | 0.00 | 1.00  | 1.00 |
| 68        | 0.00 | 1.00  | 1.00 | 0.00 | 1.00  | 1.00 |
| 69        | 0.00 | 1.00  | 1.00 | 0.00 | 1.00  | 1.00 |
| 70        | 0.00 | 1.00  | 1.00 | 0.00 | 1.00  | 1.00 |
| <b>C2</b> |      |       |      |      |       |      |
| 1         | 0.00 | 1.00  | 1.00 | 0.00 | 1.00  | 1.00 |
| 2         | 0.00 | 1.00  | 1.00 | 0.00 | 1.00  | 1.00 |
| 3         | 0.00 | 1.00  | 1.00 | 0.00 | 1.00  | 1.00 |
| 4         | 0.00 | 1.00  | 1.00 | 0.00 | 1.00  | 1.00 |
| 5         | 0.00 | 1.00  | 1.00 | 0.00 | 1.00  | 1.00 |
| 6         | 0.00 | 1.00  | 1.00 | 0.00 | 1.00  | 1.00 |
| 7         | 0.00 | 1.00  | 1.00 | 0.00 | 1.00  | 1.00 |
| 8         | 0.00 | 1.00  | 1.00 | 0.00 | 1.00  | 1.00 |
| 9         | 0.00 | 1.00  | 1.00 | 0.00 | 1.00  | 1.00 |
| 10        | 0.00 | 1.00  | 1.00 | 0.00 | 1.00  | 1.00 |
| 11        | 0.00 | 1.00  | 1.00 | 0.00 | 1.00  | 1.00 |
| 12        | 0.00 | 1.00  | 1.00 | 0.00 | 1.00  | 1.00 |
| 13        | 0.00 | 1.00  | 1.00 | 0.00 | 1.00  | 1.00 |
| 14        | 0.00 | 1.00  | 1.00 | 0.00 | 1.00  | 1.00 |
| 15        | 0.00 | 1.00  | 1.00 | 0.00 | 1.00  | 1.00 |
| 16        | 0.00 | 1.00  | 1.00 | 0.00 | 1.00  | 1.00 |
| 17        | 0.00 | 1.00  | 1.00 | 0.00 | 1.00  | 1.00 |
| 18        | 0.00 | 1.00  | 1.00 | 0.00 | 1.00  | 1.00 |

|    |      |      |      |      |       |      |
|----|------|------|------|------|-------|------|
| 19 | 0.00 | 1.00 | 1.00 | 0.00 | 1.00  | 1.00 |
| 20 | 0.00 | 1.00 | 1.00 | 0.00 | 1.00  | 1.00 |
| 21 | 0.00 | 1.00 | 1.00 | 0.04 | 0.96  | 1.00 |
| 22 | 0.00 | 1.00 | 1.00 | 0.04 | 0.96  | 1.00 |
| 23 | 0.00 | 1.00 | 1.00 | 0.10 | 0.90  | 1.00 |
| 24 | 0.00 | 1.00 | 1.00 | 0.10 | 0.90  | 1.00 |
| 25 | 0.00 | 1.00 | 1.00 | 0.06 | 0.94  | 1.00 |
| 26 | 0.00 | 1.00 | 1.00 | 0.06 | 0.94  | 1.00 |
| 27 | 0.00 | 1.00 | 1.00 | 0.06 | 0.94  | 1.00 |
| 28 | 0.00 | 1.00 | 1.00 | 0.06 | 0.94  | 1.00 |
| 29 | 0.00 | 1.00 | 1.00 | 0.00 | 1.00  | 1.00 |
| 30 | 0.00 | 1.00 | 1.00 | 0.00 | 1.00  | 1.00 |
| 31 | 0.00 | 1.00 | 1.00 | 0.00 | 1.00  | 1.00 |
| 32 | 0.00 | 1.00 | 1.00 | 0.00 | 1.00  | 1.00 |
| 33 | 0.00 | 1.00 | 1.00 | 0.00 | 1.00  | 1.00 |
| 34 | 0.00 | 1.00 | 1.00 | 0.49 | -0.51 | 1.00 |
| 35 | 0.00 | 1.00 | 1.00 | 0.49 | 0.51  | 1.00 |
| 36 | 0.00 | 1.00 | 1.00 | 0.00 | 1.00  | 1.00 |
| 37 | 0.00 | 1.00 | 1.00 | 0.00 | 1.00  | 1.00 |
| 38 | 0.00 | 1.00 | 1.00 | 0.00 | 1.00  | 1.00 |
| 39 | 0.00 | 1.00 | 1.00 | 0.00 | 1.00  | 1.00 |
| 40 | 0.00 | 1.00 | 1.00 | 0.00 | 1.00  | 1.00 |
| 41 | 0.00 | 1.00 | 1.00 | 0.00 | 1.00  | 1.00 |
| 42 | 0.00 | 1.00 | 1.00 | 0.00 | 1.00  | 1.00 |
| 43 | 0.00 | 1.00 | 1.00 | 0.00 | 1.00  | 1.00 |
| 44 | 0.00 | 1.00 | 1.00 | 0.00 | 1.00  | 1.00 |
| 45 | 0.00 | 1.00 | 1.00 | 0.00 | 1.00  | 1.00 |
| 46 | 0.00 | 1.00 | 1.00 | 0.00 | 1.00  | 1.00 |
| 47 | 0.00 | 1.00 | 1.00 | 0.00 | 1.00  | 1.00 |
| 48 | 0.00 | 1.00 | 1.00 | 0.00 | 1.00  | 1.00 |
| 49 | 0.00 | 1.00 | 1.00 | 0.00 | 1.00  | 1.00 |
| 50 | 0.00 | 1.00 | 1.00 | 0.00 | 1.00  | 1.00 |
| 51 | 0.00 | 1.00 | 1.00 | 0.00 | 1.00  | 1.00 |
| 52 | 0.00 | 1.00 | 1.00 | 0.00 | 1.00  | 1.00 |
| 53 | 0.00 | 1.00 | 1.00 | 0.00 | 1.00  | 1.00 |
| 54 | 0.00 | 1.00 | 1.00 | 0.00 | 1.00  | 1.00 |
| 55 | 0.00 | 1.00 | 1.00 | 0.00 | 1.00  | 1.00 |
| 56 | 0.00 | 1.00 | 1.00 | 0.00 | 1.00  | 1.00 |
| 57 | 0.00 | 1.00 | 1.00 | 0.00 | 1.00  | 1.00 |
| 58 | 0.00 | 1.00 | 1.00 | 0.00 | 1.00  | 1.00 |
| 59 | 0.00 | 1.00 | 1.00 | 0.00 | 1.00  | 1.00 |
| 60 | 0.00 | 1.00 | 1.00 | 0.00 | 1.00  | 1.00 |
| 61 | 0.00 | 1.00 | 1.00 | 0.00 | 1.00  | 1.00 |
| 62 | 0.00 | 1.00 | 1.00 | 0.00 | -1.00 | 1.00 |
| 63 | 0.00 | 1.00 | 1.00 | 0.00 | -1.00 | 1.00 |
| 64 | 0.00 | 1.00 | 1.00 | 0.00 | 1.00  | 1.00 |
| 65 | 0.00 | 1.00 | 1.00 | 0.00 | 1.00  | 1.00 |

|     |      |       |      |      |       |      |
|-----|------|-------|------|------|-------|------|
| 66  | 0.00 | 1.00  | 1.00 | 0.00 | 1.00  | 1.00 |
| 67  | 0.00 | 1.00  | 1.00 | 0.00 | 1.00  | 1.00 |
| 68  | 0.00 | 1.00  | 1.00 | 0.00 | 1.00  | 1.00 |
| 69  | 0.00 | -1.00 | 1.00 | 0.00 | 1.00  | 1.00 |
| 70  | 0.00 | 1.00  | 1.00 | 0.00 | 1.00  | 1.00 |
| 71  | 0.00 | 1.00  | 1.00 | 0.00 | 1.00  | 1.00 |
| 72  | 0.00 | 1.00  | 1.00 | 0.00 | 1.00  | 1.00 |
| 73  | 0.00 | 1.00  | 1.00 | 0.00 | 1.00  | 1.00 |
| 74  | 0.00 | 1.00  | 1.00 | 0.00 | 1.00  | 1.00 |
| 75  | 0.00 | 1.00  | 1.00 | 0.00 | 1.00  | 1.00 |
| 76  | 0.00 | 1.00  | 1.00 | 0.00 | 1.00  | 1.00 |
| 77  | 0.00 | 1.00  | 1.00 | 0.00 | 1.00  | 1.00 |
| 78  | 0.00 | 1.00  | 1.00 | 0.00 | 1.00  | 1.00 |
| 79  | 0.00 | 1.00  | 1.00 | 0.00 | 1.00  | 1.00 |
| 80  | 0.00 | 1.00  | 1.00 | 0.00 | 1.00  | 1.00 |
| 81  | 0.00 | 1.00  | 1.00 | 0.00 | 1.00  | 1.00 |
| 82  | 0.00 | 1.00  | 1.00 | 0.00 | 1.00  | 1.00 |
| 83  | 0.00 | 1.00  | 1.00 | 0.00 | 1.00  | 1.00 |
| 84  | 0.00 | 1.00  | 1.00 | 0.00 | 1.00  | 1.00 |
| 85  | 0.00 | 1.00  | 1.00 | 0.00 | 1.00  | 1.00 |
| 86  | 0.00 | 1.00  | 1.00 | 0.00 | 1.00  | 1.00 |
| 87  | 0.00 | 1.00  | 1.00 | 0.00 | 1.00  | 1.00 |
| 88  | 0.00 | 1.00  | 1.00 | 0.00 | -1.00 | 1.00 |
| 89  | 0.00 | 1.00  | 1.00 | 0.00 | 1.00  | 1.00 |
| 90  | 0.00 | 1.00  | 1.00 | 0.00 | 1.00  | 1.00 |
| 91  | 0.00 | 1.00  | 1.00 | 0.00 | 1.00  | 1.00 |
| 92  | 0.00 | 1.00  | 1.00 | 0.00 | 1.00  | 1.00 |
| 93  | 0.00 | 1.00  | 1.00 | 0.00 | 1.00  | 1.00 |
| 94  | 0.00 | 1.00  | 1.00 | 0.00 | 1.00  | 1.00 |
| 95  | 0.00 | 1.00  | 1.00 | 0.00 | 1.00  | 1.00 |
| 96  | 0.00 | 1.00  | 1.00 | 0.00 | 1.00  | 1.00 |
| 97  | 0.00 | 1.00  | 1.00 | 0.00 | -1.00 | 1.00 |
| 98  | 0.00 | 1.00  | 1.00 | 0.00 | -1.00 | 1.00 |
| 99  | 0.00 | -1.00 | 1.00 | 0.00 | 1.00  | 1.00 |
| 100 | 0.00 | 1.00  | 1.00 | 0.00 | -1.00 | 1.00 |
| 101 | 0.00 | 1.00  | 1.00 | 0.00 | 1.00  | 1.00 |
| 102 | 0.00 | 1.00  | 1.00 | 0.00 | 1.00  | 1.00 |
| 103 | 0.00 | 1.00  | 1.00 | 0.00 | 1.00  | 1.00 |
| 104 | 0.00 | 1.00  | 1.00 | 0.00 | 1.00  | 1.00 |
| 105 | 0.00 | 1.00  | 1.00 | 0.00 | 1.00  | 1.00 |
| 106 | 0.00 | 1.00  | 1.00 | 0.00 | 1.00  | 1.00 |
| 107 | 0.00 | 1.00  | 1.00 | 0.00 | -1.00 | 1.00 |
| 108 | 0.00 | 1.00  | 1.00 | 0.00 | -1.00 | 1.00 |
| 109 | 0.00 | 1.00  | 1.00 | 0.00 | 1.00  | 1.00 |
| 110 | 0.00 | 1.00  | 1.00 | 0.00 | 1.00  | 1.00 |
| 111 | 0.00 | 1.00  | 1.00 | 0.00 | 1.00  | 1.00 |
| 112 | 0.00 | 1.00  | 1.00 | 0.00 | 1.00  | 1.00 |

|     |      |       |      |      |       |      |
|-----|------|-------|------|------|-------|------|
| 113 | 0.00 | -1.00 | 1.00 | 0.00 | 1.00  | 1.00 |
| 114 | 0.00 | 1.00  | 1.00 | 0.00 | 1.00  | 1.00 |
| 115 | 0.00 | 1.00  | 1.00 | 0.00 | 1.00  | 1.00 |
| 116 | 0.00 | 1.00  | 1.00 | 0.00 | 1.00  | 1.00 |
| 117 | 0.00 | 1.00  | 1.00 | 0.00 | 1.00  | 1.00 |
| 118 | 0.00 | 1.00  | 1.00 | 0.00 | 1.00  | 1.00 |
| 119 | 0.00 | 1.00  | 1.00 | 0.00 | 1.00  | 1.00 |
| 120 | 0.00 | -1.00 | 1.00 | 0.00 | 1.00  | 1.00 |
| 121 | 0.00 | 1.00  | 1.00 | 0.00 | 1.00  | 1.00 |
| 122 | 0.00 | 1.00  | 1.00 | 0.00 | 1.00  | 1.00 |
| 123 | 0.00 | 1.00  | 1.00 | 0.00 | 1.00  | 1.00 |
| 124 | 0.00 | 1.00  | 1.00 | 0.00 | 1.00  | 1.00 |
| 125 | 0.00 | 1.00  | 1.00 | 0.00 | 1.00  | 1.00 |
| 126 | 0.00 | 1.00  | 1.00 | 0.00 | 1.00  | 1.00 |
| 127 | 0.00 | 1.00  | 1.00 | 0.00 | 1.00  | 1.00 |
| 128 | 0.00 | 1.00  | 1.00 | 0.00 | 1.00  | 1.00 |
| 129 | 0.00 | 1.00  | 1.00 | 0.00 | 1.00  | 1.00 |
| 130 | 0.00 | 1.00  | 1.00 | 0.00 | 1.00  | 1.00 |
| 131 | 0.01 | 0.99  | 1.00 | 0.00 | 1.00  | 1.00 |
| 132 | 0.00 | 1.00  | 1.00 | 0.00 | 1.00  | 1.00 |
| 133 | 0.00 | 1.00  | 1.00 | 0.00 | 1.00  | 1.00 |
| 134 | 0.00 | 1.00  | 1.00 | 0.00 | 1.00  | 1.00 |
| 135 | 0.01 | 0.99  | 1.00 | 0.00 | 1.00  | 1.00 |
| 136 | 0.01 | 0.99  | 1.00 | 0.00 | 1.00  | 1.00 |
| 137 | 0.00 | 1.00  | 1.00 | 1.00 | 0.00  | 1.00 |
| 138 | 0.00 | 1.00  | 1.00 | 1.00 | 0.00  | 1.00 |
| 139 | 0.00 | 1.00  | 1.00 | 0.00 | 1.00  | 1.00 |
| 140 | 0.00 | 1.00  | 1.00 | 0.01 | 0.99  | 1.00 |
| 141 | 0.00 | 1.00  | 1.00 | 0.01 | 0.99  | 1.00 |
| 142 | 0.00 | 1.00  | 1.00 | 0.01 | 0.99  | 1.00 |
| 143 | 0.00 | 1.00  | 1.00 | 0.00 | 1.00  | 1.00 |
| 144 | 0.00 | 1.00  | 1.00 | 0.00 | 1.00  | 1.00 |
| 145 | 0.00 | -1.00 | 1.00 | 0.00 | 1.00  | 1.00 |
| 146 | 0.00 | 1.00  | 1.00 | 0.00 | 1.00  | 1.00 |
| 147 | 0.00 | 1.00  | 1.00 | 0.00 | 1.00  | 1.00 |
| 148 | 0.01 | -0.99 | 1.00 | 0.00 | 1.00  | 1.00 |
| 149 | 0.00 | 1.00  | 1.00 | 0.00 | 1.00  | 1.00 |
| 150 | 0.01 | 0.99  | 1.00 | 0.00 | 1.00  | 1.00 |
| 151 | 0.00 | 1.00  | 1.00 | 1.00 | 0.00  | 1.00 |
| 152 | 0.89 | 0.11  | 1.00 | 1.00 | 0.00  | 1.00 |
| 153 | 0.89 | 0.11  | 1.00 | 0.00 | 1.00  | 1.00 |
| 154 | 0.00 | 1.00  | 1.00 | 0.00 | 1.00  | 1.00 |
| 155 | 0.00 | 1.00  | 1.00 | 0.00 | -1.00 | 1.00 |
| 156 | 0.00 | 1.00  | 1.00 | 0.00 | 1.00  | 1.00 |
| 157 | 0.00 | -1.00 | 1.00 | 0.00 | 1.00  | 1.00 |
| 158 | 0.01 | 0.99  | 1.00 | 0.00 | 1.00  | 1.00 |
| 159 | 0.00 | -1.00 | 1.00 | 0.00 | 1.00  | 1.00 |

|           |      |       |      |      |       |      |
|-----------|------|-------|------|------|-------|------|
| 160       | 0.00 | 1.00  | 1.00 | 0.00 | 1.00  | 1.00 |
| 161       | 1.00 | 0.00  | 1.00 | 0.00 | 1.00  | 1.00 |
| 162       | 1.00 | 0.00  | 1.00 | 0.00 | -1.00 | 1.00 |
| 163       | 0.00 | 1.00  | 1.00 | 0.00 | 1.00  | 1.00 |
| 164       | 0.03 | 0.97  | 1.00 | 0.00 | 1.00  | 1.00 |
| 165       | 0.03 | 0.97  | 1.00 | 0.00 | 1.00  | 1.00 |
| 166       | 0.00 | 1.00  | 1.00 | 0.02 | 0.98  | 1.00 |
| 167       | 0.00 | 1.00  | 1.00 | 0.01 | 0.99  | 1.00 |
| 168       | 0.00 | 1.00  | 1.00 | 0.01 | 0.99  | 1.00 |
| 169       | 0.00 | 1.00  | 1.00 | 0.02 | 0.98  | 1.00 |
| 170       | 0.00 | 1.00  | 1.00 | 0.00 | 1.00  | 1.00 |
| 171       | 0.00 | 1.00  | 1.00 | 0.02 | 0.98  | 1.00 |
| 172       | 0.00 | 1.00  | 1.00 | 0.02 | 0.98  | 1.00 |
| 173       | 0.00 | 1.00  | 1.00 | 0.00 | 1.00  | 1.00 |
| 174       | 0.00 | -1.00 | 1.00 | 0.00 | 1.00  | 1.00 |
| 175       | 0.00 | -1.00 | 1.00 | 0.00 | 1.00  | 1.00 |
| 176       | 0.00 | 1.00  | 1.00 | 0.01 | 0.99  | 1.00 |
| 177       | 0.00 | 1.00  | 1.00 | 0.00 | 1.00  | 1.00 |
| 178       | 0.00 | 1.00  | 1.00 | 0.00 | 1.00  | 1.00 |
| 179       | 0.00 | 1.00  | 1.00 | 0.00 | 1.00  | 1.00 |
| 180       | 0.00 | 1.00  | 1.00 | 0.05 | -0.95 | 1.00 |
| 181       | 0.00 | 1.00  | 1.00 | 0.05 | 0.95  | 1.00 |
| 182       | 0.00 | 1.00  | 1.00 | 0.00 | 1.00  | 1.00 |
| 183       | 0.03 | 0.97  | 1.00 | 0.00 | 1.00  | 1.00 |
| 184       | 0.00 | -1.00 | 1.00 | 0.00 | -1.00 | 1.00 |
| 185       | 0.03 | -0.97 | 1.00 | 0.00 | 1.00  | 1.00 |
| 186       | 0.00 | 1.00  | 1.00 | 0.00 | 1.00  | 1.00 |
| <b>C3</b> |      |       |      |      |       |      |
| 1         | 0.00 | 1.00  | 1.00 | 0.00 | 1.00  | 1.00 |
| 2         | 0.00 | 1.00  | 1.00 | 0.00 | 1.00  | 1.00 |
| 3         | 0.00 | 1.00  | 1.00 | 0.00 | 1.00  | 1.00 |
| 4         | 0.00 | 1.00  | 1.00 | 0.00 | 1.00  | 1.00 |
| 5         | 0.00 | 1.00  | 1.00 | 0.00 | 1.00  | 1.00 |
| 6         | 0.00 | 1.00  | 1.00 | 0.00 | 1.00  | 1.00 |
| 7         | 0.00 | 1.00  | 1.00 | 0.00 | 1.00  | 1.00 |
| 8         | 0.00 | 1.00  | 1.00 | 0.00 | 1.00  | 1.00 |
| 9         | 0.00 | 1.00  | 1.00 | 1.00 | 0.00  | 1.00 |
| 10        | 0.00 | 1.00  | 1.00 | 1.00 | 0.00  | 1.00 |
| 11        | 0.00 | 1.00  | 1.00 | 0.00 | 1.00  | 1.00 |
| 12        | 0.00 | 1.00  | 1.00 | 0.00 | 1.00  | 1.00 |
| 13        | 0.00 | 1.00  | 1.00 | 0.00 | 1.00  | 1.00 |
| 14        | 0.00 | 1.00  | 1.00 | 0.00 | 1.00  | 1.00 |
| 15        | 0.00 | 1.00  | 1.00 | 0.00 | 1.00  | 1.00 |
| 16        | 0.00 | 1.00  | 1.00 | 0.00 | 1.00  | 1.00 |
| 17        | 0.00 | 1.00  | 1.00 | 0.00 | 1.00  | 1.00 |
| 18        | 0.00 | 1.00  | 1.00 | 0.00 | 1.00  | 1.00 |
| 19        | 0.00 | 1.00  | 1.00 | 0.00 | 1.00  | 1.00 |
| 20        | 0.00 | 1.00  | 1.00 | 0.00 | 1.00  | 1.00 |

|    |      |       |      |      |      |      |
|----|------|-------|------|------|------|------|
| 21 | 0.00 | 1.00  | 1.00 | 0.00 | 1.00 | 1.00 |
| 22 | 0.00 | 1.00  | 1.00 | 0.00 | 1.00 | 1.00 |
| 23 | 0.00 | 1.00  | 1.00 | 0.00 | 1.00 | 1.00 |
| 24 | 0.00 | 1.00  | 1.00 | 0.00 | 1.00 | 1.00 |
| 25 | 0.00 | 1.00  | 1.00 | 0.00 | 1.00 | 1.00 |
| 26 | 0.00 | 1.00  | 1.00 | 0.00 | 1.00 | 1.00 |
| 27 | 0.00 | 1.00  | 1.00 | 0.00 | 1.00 | 1.00 |
| 28 | 0.00 | 1.00  | 1.00 | 0.00 | 1.00 | 1.00 |
| 29 | 0.00 | 1.00  | 1.00 | 0.00 | 1.00 | 1.00 |
| 30 | 0.00 | 1.00  | 1.00 | 0.00 | 1.00 | 1.00 |
| 31 | 0.00 | 1.00  | 1.00 | 0.00 | 1.00 | 1.00 |
| 32 | 0.00 | 1.00  | 1.00 | 0.00 | 1.00 | 1.00 |
| 33 | 0.00 | 1.00  | 1.00 | 0.00 | 1.00 | 1.00 |
| 34 | 0.00 | 1.00  | 1.00 | 0.00 | 1.00 | 1.00 |
| 35 | 0.00 | 1.00  | 1.00 | 0.00 | 1.00 | 1.00 |
| 36 | 0.00 | 1.00  | 1.00 | 0.00 | 1.00 | 1.00 |
| 37 | 0.00 | 1.00  | 1.00 | 0.00 | 1.00 | 1.00 |
| 38 | 0.00 | 1.00  | 1.00 | 0.00 | 1.00 | 1.00 |
| 39 | 0.00 | 1.00  | 1.00 | 0.00 | 1.00 | 1.00 |
| 40 | 0.00 | 1.00  | 1.00 | 0.00 | 1.00 | 1.00 |
| 41 | 0.00 | 1.00  | 1.00 | 0.00 | 1.00 | 1.00 |
| 42 | 0.00 | 1.00  | 1.00 | 0.00 | 1.00 | 1.00 |
| 43 | 0.00 | 1.00  | 1.00 | 0.00 | 1.00 | 1.00 |
| 44 | 0.00 | 1.00  | 1.00 | 0.00 | 1.00 | 1.00 |
| 45 | 0.00 | 1.00  | 1.00 | 0.00 | 1.00 | 1.00 |
| 46 | 0.00 | 1.00  | 1.00 | 0.00 | 1.00 | 1.00 |
| 47 | 0.00 | 1.00  | 1.00 | 0.00 | 1.00 | 1.00 |
| 48 | 0.00 | 1.00  | 1.00 | 0.00 | 1.00 | 1.00 |
| 49 | 0.00 | 1.00  | 1.00 | 0.00 | 1.00 | 1.00 |
| 50 | 0.00 | 1.00  | 1.00 | 0.00 | 1.00 | 1.00 |
| 51 | 0.00 | 1.00  | 1.00 | 0.00 | 1.00 | 1.00 |
| 52 | 0.00 | 1.00  | 1.00 | 0.00 | 1.00 | 1.00 |
| 53 | 0.00 | 1.00  | 1.00 | 0.00 | 1.00 | 1.00 |
| 54 | 0.00 | 1.00  | 1.00 | 1.00 | 0.00 | 1.00 |
| 55 | 0.00 | 1.00  | 1.00 | 1.00 | 0.00 | 1.00 |
| 56 | 0.97 | -0.03 | 1.00 | 0.00 | 1.00 | 1.00 |
| 57 | 0.97 | 0.03  | 1.00 | 0.00 | 1.00 | 1.00 |
| 58 | 0.00 | 1.00  | 1.00 | 0.00 | 1.00 | 1.00 |
| 59 | 0.00 | 1.00  | 1.00 | 0.00 | 1.00 | 1.00 |
| 60 | 0.00 | 1.00  | 1.00 | 0.00 | 1.00 | 1.00 |
| 61 | 0.00 | 1.00  | 1.00 | 0.00 | 1.00 | 1.00 |
| 62 | 0.00 | 1.00  | 1.00 | 0.00 | 1.00 | 1.00 |
| 63 | 0.00 | 1.00  | 1.00 | 0.00 | 1.00 | 1.00 |
| 64 | 0.00 | 1.00  | 1.00 | 0.00 | 1.00 | 1.00 |
| 65 | 0.00 | 1.00  | 1.00 | 0.00 | 1.00 | 1.00 |
| 66 | 0.00 | 1.00  | 1.00 | 0.00 | 1.00 | 1.00 |
| 67 | 0.00 | 1.00  | 1.00 | 0.00 | 1.00 | 1.00 |

|     |      |       |      |      |       |      |
|-----|------|-------|------|------|-------|------|
| 68  | 0.00 | 1.00  | 1.00 | 0.00 | 1.00  | 1.00 |
| 69  | 0.00 | 1.00  | 1.00 | 0.00 | 1.00  | 1.00 |
| 70  | 0.00 | 1.00  | 1.00 | 0.00 | 1.00  | 1.00 |
| 71  | 0.00 | 1.00  | 1.00 | 0.00 | 1.00  | 1.00 |
| 72  | 0.00 | 1.00  | 1.00 | 0.00 | 1.00  | 1.00 |
| 73  | 0.00 | 1.00  | 1.00 | 0.00 | 1.00  | 1.00 |
| 74  | 0.00 | 1.00  | 1.00 | 0.00 | 1.00  | 1.00 |
| 75  | 0.00 | 1.00  | 1.00 | 0.00 | 1.00  | 1.00 |
| 76  | 0.00 | 1.00  | 1.00 | 0.00 | 1.00  | 1.00 |
| 77  | 0.00 | 1.00  | 1.00 | 0.00 | 1.00  | 1.00 |
| 78  | 0.00 | 1.00  | 1.00 | 0.00 | 1.00  | 1.00 |
| 79  | 0.00 | 1.00  | 1.00 | 0.00 | 1.00  | 1.00 |
| 80  | 0.00 | 1.00  | 1.00 | 0.00 | 1.00  | 1.00 |
| 81  | 0.00 | 1.00  | 1.00 | 0.00 | 1.00  | 1.00 |
| 82  | 0.00 | -1.00 | 1.00 | 0.00 | 1.00  | 1.00 |
| 83  | 0.00 | 1.00  | 1.00 | 0.00 | 1.00  | 1.00 |
| 84  | 0.00 | 1.00  | 1.00 | 0.01 | 0.99  | 1.00 |
| 85  | 0.00 | 1.00  | 1.00 | 0.01 | 0.99  | 1.00 |
| 86  | 0.00 | 1.00  | 1.00 | 0.00 | 1.00  | 1.00 |
| 87  | 0.00 | 1.00  | 1.00 | 0.00 | 1.00  | 1.00 |
| 88  | 0.00 | 1.00  | 1.00 | 0.00 | 1.00  | 1.00 |
| 89  | 0.00 | 1.00  | 1.00 | 0.00 | 1.00  | 1.00 |
| 90  | 0.00 | 1.00  | 1.00 | 0.00 | 1.00  | 1.00 |
| 91  | 0.00 | 1.00  | 1.00 | 0.00 | 1.00  | 1.00 |
| 92  | 0.00 | 1.00  | 1.00 | 0.00 | 1.00  | 1.00 |
| 93  | 0.00 | 1.00  | 1.00 | 0.00 | 1.00  | 1.00 |
| 94  | 0.00 | 1.00  | 1.00 | 0.00 | 1.00  | 1.00 |
| 95  | 0.00 | 1.00  | 1.00 | 0.00 | 1.00  | 1.00 |
| 96  | 0.00 | 1.00  | 1.00 | 0.00 | 1.00  | 1.00 |
| 97  | 0.00 | 1.00  | 1.00 | 0.00 | 1.00  | 1.00 |
| 98  | 0.00 | 1.00  | 1.00 | 0.00 | 1.00  | 1.00 |
| 99  | 0.00 | 1.00  | 1.00 | 0.00 | 1.00  | 1.00 |
| 100 | 0.00 | 1.00  | 1.00 | 0.00 | 1.00  | 1.00 |
| 101 | 0.00 | 1.00  | 1.00 | 0.01 | -0.99 | 1.00 |
| 102 | 0.00 | 1.00  | 1.00 | 0.01 | 0.99  | 1.00 |
| 103 | 0.00 | 1.00  | 1.00 | 0.00 | 1.00  | 1.00 |
| 104 | 0.00 | 1.00  | 1.00 | 0.00 | 1.00  | 1.00 |
| 105 | 0.00 | 1.00  | 1.00 | 0.00 | 1.00  | 1.00 |
| 106 | 0.00 | 1.00  | 1.00 | 0.00 | 1.00  | 1.00 |
| 107 | 0.00 | 1.00  | 1.00 | 0.00 | 1.00  | 1.00 |
| 108 | 0.00 | 1.00  | 1.00 | 0.00 | 1.00  | 1.00 |
| 109 | 0.00 | 1.00  | 1.00 | 0.00 | 1.00  | 1.00 |
| 110 | 0.00 | 1.00  | 1.00 | 0.00 | 1.00  | 1.00 |
| 111 | 0.00 | 1.00  | 1.00 | 0.00 | 1.00  | 1.00 |
| 112 | 0.00 | 1.00  | 1.00 | 0.00 | 1.00  | 1.00 |
| 113 | 0.00 | 1.00  | 1.00 | 0.00 | 1.00  | 1.00 |
| 114 | 0.00 | 1.00  | 1.00 | 0.00 | 1.00  | 1.00 |

|     |      |       |      |      |       |      |
|-----|------|-------|------|------|-------|------|
| 115 | 0.00 | 1.00  | 1.00 | 0.00 | 1.00  | 1.00 |
| 116 | 0.00 | 1.00  | 1.00 | 0.00 | 1.00  | 1.00 |
| 117 | 0.00 | 1.00  | 1.00 | 0.00 | 1.00  | 1.00 |
| 118 | 0.00 | 1.00  | 1.00 | 0.00 | 1.00  | 1.00 |
| 119 | 0.00 | 1.00  | 1.00 | 0.00 | 1.00  | 1.00 |
| 120 | 0.00 | 1.00  | 1.00 | 0.00 | 1.00  | 1.00 |
| 121 | 0.00 | 1.00  | 1.00 | 0.00 | 1.00  | 1.00 |
| 122 | 0.00 | 1.00  | 1.00 | 0.00 | 1.00  | 1.00 |
| 123 | 0.00 | 1.00  | 1.00 | 0.00 | 1.00  | 1.00 |
| 124 | 0.00 | 1.00  | 1.00 | 0.00 | 1.00  | 1.00 |
| 125 | 0.00 | 1.00  | 1.00 | 0.00 | 1.00  | 1.00 |
| 126 | 0.03 | 0.97  | 1.00 | 0.00 | 1.00  | 1.00 |
| 127 | 0.03 | 0.97  | 1.00 | 0.00 | 1.00  | 1.00 |
| 128 | 0.00 | 1.00  | 1.00 | 0.00 | 1.00  | 1.00 |
| 129 | 0.00 | 1.00  | 1.00 | 0.00 | -1.00 | 1.00 |
| 130 | 0.00 | 1.00  | 1.00 | 0.00 | 1.00  | 1.00 |
| 131 | 0.01 | -0.99 | 1.00 | 0.00 | 1.00  | 1.00 |
| 132 | 0.02 | -0.98 | 1.00 | 0.00 | 1.00  | 1.00 |
| 133 | 0.03 | -0.97 | 1.00 | 0.00 | 1.00  | 1.00 |
| 134 | 0.03 | -0.97 | 1.00 | 0.00 | 1.00  | 1.00 |
| 135 | 0.00 | 1.00  | 1.00 | 0.00 | 1.00  | 1.00 |
| 136 | 0.00 | 1.00  | 1.00 | 0.00 | 1.00  | 1.00 |
| 137 | 0.00 | 1.00  | 1.00 | 0.00 | 1.00  | 1.00 |
| 138 | 0.00 | -1.00 | 1.00 | 0.00 | 1.00  | 1.00 |
| 139 | 0.00 | 1.00  | 1.00 | 0.00 | 1.00  | 1.00 |
| 140 | 0.00 | 1.00  | 1.00 | 0.00 | 1.00  | 1.00 |
| 141 | 0.01 | -0.99 | 1.00 | 0.01 | 0.99  | 1.00 |
| 142 | 0.02 | 0.98  | 1.00 | 0.00 | 1.00  | 1.00 |
| 143 | 0.00 | 1.00  | 1.00 | 0.00 | 1.00  | 1.00 |
| 144 | 0.00 | 1.00  | 1.00 | 0.07 | -0.93 | 1.00 |
| 145 | 0.00 | 1.00  | 1.00 | 0.06 | 0.94  | 1.00 |
| 146 | 0.00 | 1.00  | 1.00 | 0.00 | 1.00  | 1.00 |
| 147 | 0.01 | 0.99  | 1.00 | 0.00 | 1.00  | 1.00 |
| 148 | 0.01 | 0.99  | 1.00 | 0.01 | 0.99  | 1.00 |
| 149 | 0.00 | 1.00  | 1.00 | 0.00 | 1.00  | 1.00 |
| 150 | 0.00 | 1.00  | 1.00 | 0.00 | 1.00  | 1.00 |
| 151 | 0.00 | 1.00  | 1.00 | 0.00 | 1.00  | 1.00 |
| 152 | 0.00 | 1.00  | 1.00 | 0.00 | 1.00  | 1.00 |
| 153 | 0.00 | 1.00  | 1.00 | 0.00 | 1.00  | 1.00 |
| 154 | 0.00 | 1.00  | 1.00 | 0.00 | 1.00  | 1.00 |
| 155 | 0.00 | 1.00  | 1.00 | 0.01 | 0.99  | 1.00 |
| 156 | 0.00 | 1.00  | 1.00 | 0.01 | 0.99  | 1.00 |
| 157 | 0.00 | 1.00  | 1.00 | 0.01 | 0.99  | 1.00 |
| 158 | 0.00 | 1.00  | 1.00 | 0.00 | 1.00  | 1.00 |
| 159 | 0.00 | 1.00  | 1.00 | 0.00 | 1.00  | 1.00 |
| 160 | 0.00 | 1.00  | 1.00 | 0.00 | 1.00  | 1.00 |
| 161 | 0.00 | 1.00  | 1.00 | 0.01 | 0.99  | 1.00 |



|     |      |       |      |      |       |      |
|-----|------|-------|------|------|-------|------|
| 162 | 0.00 | 1.00  | 1.00 | 0.01 | 0.99  | 1.00 |
| 163 | 0.02 | -0.98 | 1.00 | 0.00 | 1.00  | 1.00 |
| 164 | 0.02 | 0.98  | 1.00 | 0.01 | -0.99 | 1.00 |
| 165 | 0.02 | 0.98  | 1.00 | 0.00 | 1.00  | 1.00 |
| 166 | 0.01 | 0.99  | 1.00 | 0.01 | 0.99  | 1.00 |
| 167 | 0.01 | 0.99  | 1.00 | 0.00 | 1.00  | 1.00 |
| 168 | 0.01 | 0.99  | 1.00 | 0.00 | 1.00  | 1.00 |
| 169 | 0.02 | 0.98  | 1.00 | 0.00 | 1.00  | 1.00 |
| 170 | 0.05 | 0.95  | 1.00 | 0.00 | 1.00  | 1.00 |
| 171 | 0.09 | 0.91  | 1.00 | 0.00 | 1.00  | 1.00 |
| 172 | 0.11 | 0.89  | 1.00 | 0.00 | 1.00  | 1.00 |
| 173 | 0.02 | 0.98  | 1.00 | 0.00 | 1.00  | 1.00 |
| 174 | 0.01 | -0.99 | 1.00 | 0.00 | 1.00  | 1.00 |
| 175 | 0.49 | -0.51 | 1.00 | 0.00 | 1.00  | 1.00 |
| 176 | 0.52 | 0.48  | 1.00 | 0.00 | 1.00  | 1.00 |
| 177 | 0.83 | 0.17  | 1.00 | 0.00 | 1.00  | 1.00 |
| 178 | 0.88 | 0.12  | 1.00 | 0.02 | -0.98 | 1.00 |
| 179 | 0.62 | 0.38  | 1.00 | 0.05 | 0.95  | 1.00 |
| 180 | 0.46 | -0.54 | 1.00 | 0.00 | 1.00  | 1.00 |
| 181 | 0.03 | 0.97  | 1.00 | 0.03 | 0.97  | 1.00 |
| 182 | 0.01 | 0.99  | 1.00 | 0.01 | 0.99  | 1.00 |
| 183 | 0.01 | 0.99  | 1.00 | 0.01 | 0.99  | 1.00 |
| 184 | 0.02 | 0.98  | 1.00 | 0.01 | 0.99  | 1.00 |
| 185 | 0.00 | -1.00 | 1.00 | 0.02 | 0.98  | 1.00 |
| 186 | 0.00 | 1.00  | 1.00 | 0.06 | 0.94  | 1.00 |
| 187 | 0.00 | 1.00  | 1.00 | 0.01 | -0.99 | 1.00 |
| 188 | 0.00 | 1.00  | 1.00 | 0.06 | 0.94  | 1.00 |
| 189 | 0.00 | 1.00  | 1.00 | 0.04 | -0.96 | 1.00 |
| 190 | 0.00 | 1.00  | 1.00 | 0.06 | -0.94 | 1.00 |
| 191 | 0.00 | 1.00  | 1.00 | 0.15 | 0.85  | 1.00 |
| 192 | 0.01 | 0.99  | 1.00 | 0.29 | -0.71 | 1.00 |
| 193 | 0.00 | -1.00 | 1.00 | 0.33 | -0.67 | 1.00 |
| 194 | 0.00 | -1.00 | 1.00 | 0.06 | 0.94  | 1.00 |
| 195 | 0.00 | 1.00  | 1.00 | 0.02 | 0.98  | 1.00 |
| 196 | 0.00 | 1.00  | 1.00 | 0.09 | 0.91  | 1.00 |
| 197 | 0.00 | -1.00 | 1.00 | 0.17 | 0.83  | 1.00 |
| 198 | 0.00 | -1.00 | 1.00 | 0.22 | -0.78 | 1.00 |
| 199 | 0.00 | 1.00  | 1.00 | 0.07 | 0.93  | 1.00 |
| 200 | 0.00 | -1.00 | 1.00 | 0.09 | 0.91  | 1.00 |
| 201 | 0.00 | 1.00  | 1.00 | 0.06 | 0.94  | 1.00 |
| 202 | 0.00 | 1.00  | 1.00 | 0.09 | 0.91  | 1.00 |
| 203 | 0.00 | -1.00 | 1.00 | 0.05 | 0.95  | 1.00 |
| 204 | 0.00 | 1.00  | 1.00 | 0.01 | 0.99  | 1.00 |
| 205 | 0.00 | 1.00  | 1.00 | 0.05 | 0.95  | 1.00 |
| 206 | 0.00 | 1.00  | 1.00 | 0.05 | 0.95  | 1.00 |
| 207 | 0.00 | 1.00  | 1.00 | 0.00 | 1.00  | 1.00 |
| 208 | 0.00 | -1.00 | 1.00 | 0.02 | 0.98  | 1.00 |

|     |      |      |      |      |       |      |
|-----|------|------|------|------|-------|------|
| 209 | 0.00 | 1.00 | 1.00 | 0.04 | 0.96  | 1.00 |
| 210 | 0.00 | 1.00 | 1.00 | 0.64 | -0.36 | 1.00 |
| 211 | 0.00 | 1.00 | 1.00 | 0.62 | 0.38  | 1.00 |
| 212 | 0.00 | 1.00 | 1.00 | 0.01 | 0.99  | 1.00 |
| 213 | 0.01 | 0.99 | 1.00 | 0.03 | 0.97  | 1.00 |
| 214 | 0.00 | 1.00 | 1.00 | 0.00 | 1.00  | 1.00 |
| 215 | 0.00 | 1.00 | 1.00 | 0.02 | 0.98  | 1.00 |
| 216 | 0.00 | 1.00 | 1.00 | 0.01 | 0.99  | 1.00 |
| 217 | 0.00 | 1.00 | 1.00 | 0.01 | 0.99  | 1.00 |
| 218 | 0.00 | 1.00 | 1.00 | 0.00 | 1.00  | 1.00 |

S3: Charge Density Difference (CDD) Plots ( $|\varphi_i^{nr}|^2 - |\varphi_i^{DKH}|^2$ ) for relevant MOs for all Complexes based on the DKH approximation

|         | MO | CDD |         | MO |
|---------|----|-----|---------|----|
| C1<br>O | 57 |     | C1<br>P | 27 |
|         | 58 |     |         | 28 |
|         |    |     |         | 37 |
|         |    |     |         | 38 |
|         |    |     |         | 39 |
|         |    |     |         | 40 |
|         |    |     |         | 63 |
|         |    |     |         | 64 |

|         | MO | CDD                                                                                 |         | MO  |                                                                                      |
|---------|----|-------------------------------------------------------------------------------------|---------|-----|--------------------------------------------------------------------------------------|
| C2<br>O | 52 | 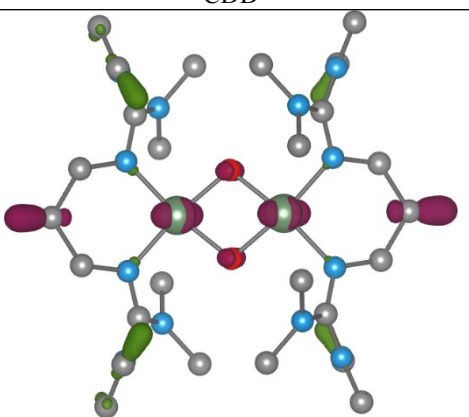   | C2<br>P | 137 |    |
|         | 53 |   |         | 138 |   |
|         | 61 |  |         | 151 |  |
|         | 62 |  |         | 152 |  |

|           |    |                                                                                     |  |           |     |                                                                                      |
|-----------|----|-------------------------------------------------------------------------------------|--|-----------|-----|--------------------------------------------------------------------------------------|
|           |    |                                                                                     |  |           | 180 | 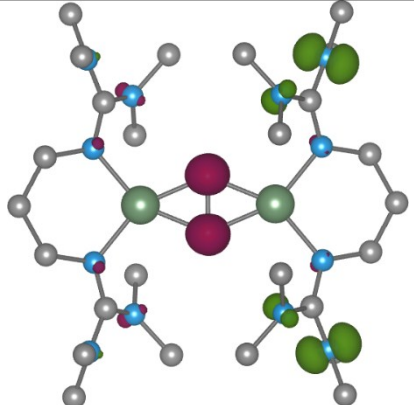   |
|           |    |                                                                                     |  |           | 181 |   |
| <b>C3</b> | MO | <b>CDD</b>                                                                          |  | <b>C3</b> | MO  |                                                                                      |
| <b>O</b>  | 56 |  |  | <b>P</b>  | 144 |  |
|           | 57 |  |  |           | 145 |  |

|     |                                                                                     |     |                                                                                       |
|-----|-------------------------------------------------------------------------------------|-----|---------------------------------------------------------------------------------------|
| 170 | 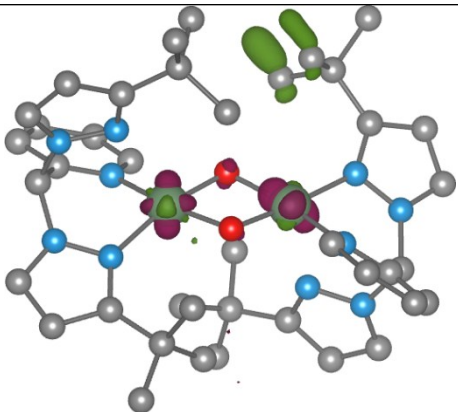   | 179 |    |
| 171 |   | 186 |   |
| 172 |  | 188 |  |
| 175 |  | 188 |  |

|     |                                                                                                                                                                                                                                                                                                                                                                                                                                                  |     |                                                                                                                                                                                                                                                                                                                                                                               |
|-----|--------------------------------------------------------------------------------------------------------------------------------------------------------------------------------------------------------------------------------------------------------------------------------------------------------------------------------------------------------------------------------------------------------------------------------------------------|-----|-------------------------------------------------------------------------------------------------------------------------------------------------------------------------------------------------------------------------------------------------------------------------------------------------------------------------------------------------------------------------------|
| 176 | 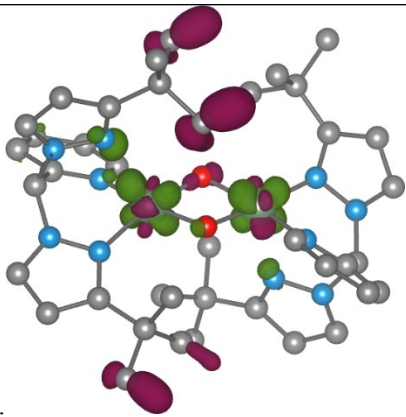 <p>A ball-and-stick model of a complex organic molecule, possibly a porphyrin derivative, with a central metal atom (grey). The structure is surrounded by large purple and green isosurfaces, likely representing electron density or electrostatic potential. The atoms are colored: carbon (grey), oxygen (red), nitrogen (blue), and hydrogen (white).</p> | 189 |  <p>A ball-and-stick model of a complex organic molecule, similar to the one in 176, with a central metal atom (grey). The structure is surrounded by large purple and green isosurfaces. The atoms are colored: carbon (grey), oxygen (red), nitrogen (blue), and hydrogen (white).</p>   |
| 177 |  <p>A ball-and-stick model of a complex organic molecule, similar to the one in 176, with a central metal atom (grey). The structure is surrounded by large purple and green isosurfaces. The atoms are colored: carbon (grey), oxygen (red), nitrogen (blue), and hydrogen (white).</p>                                                                       | 190 |  <p>A ball-and-stick model of a complex organic molecule, similar to the one in 176, with a central metal atom (grey). The structure is surrounded by large purple and green isosurfaces. The atoms are colored: carbon (grey), oxygen (red), nitrogen (blue), and hydrogen (white).</p>  |
| 178 |  <p>A ball-and-stick model of a complex organic molecule, similar to the one in 176, with a central metal atom (grey). The structure is surrounded by large purple and green isosurfaces. The atoms are colored: carbon (grey), oxygen (red), nitrogen (blue), and hydrogen (white).</p>                                                                      | 191 |  <p>A ball-and-stick model of a complex organic molecule, similar to the one in 176, with a central metal atom (grey). The structure is surrounded by large purple and green isosurfaces. The atoms are colored: carbon (grey), oxygen (red), nitrogen (blue), and hydrogen (white).</p> |
| 179 |  <p>A ball-and-stick model of a complex organic molecule, similar to the one in 176, with a central metal atom (grey). The structure is surrounded by large purple and green isosurfaces. The atoms are colored: carbon (grey), oxygen (red), nitrogen (blue), and hydrogen (white).</p>                                                                      | 192 |  <p>A ball-and-stick model of a complex organic molecule, similar to the one in 176, with a central metal atom (grey). The structure is surrounded by large purple and green isosurfaces. The atoms are colored: carbon (grey), oxygen (red), nitrogen (blue), and hydrogen (white).</p> |

|  |     |                                                                                   |  |     |                                                                                       |
|--|-----|-----------------------------------------------------------------------------------|--|-----|---------------------------------------------------------------------------------------|
|  | 180 | 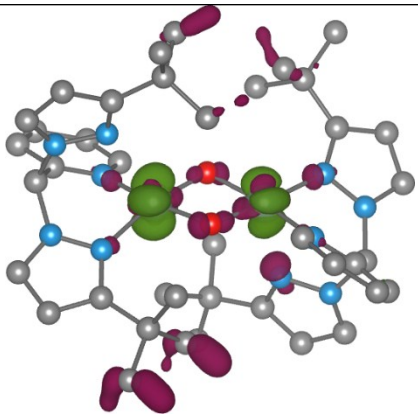 |  | 193 |    |
|  |     |                                                                                   |  | 194 |   |
|  |     |                                                                                   |  | 196 |  |
|  |     |                                                                                   |  | 197 |  |



|  |  |  |     |                                                                                       |
|--|--|--|-----|---------------------------------------------------------------------------------------|
|  |  |  | 198 | 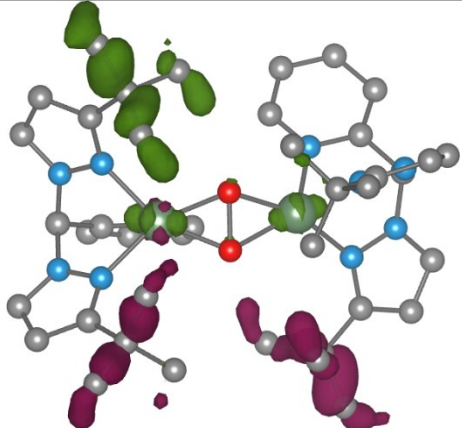   |
|  |  |  | 199 |   |
|  |  |  | 200 |  |
|  |  |  | 201 |  |

|  |  |  |     |                                                                                       |
|--|--|--|-----|---------------------------------------------------------------------------------------|
|  |  |  | 202 | 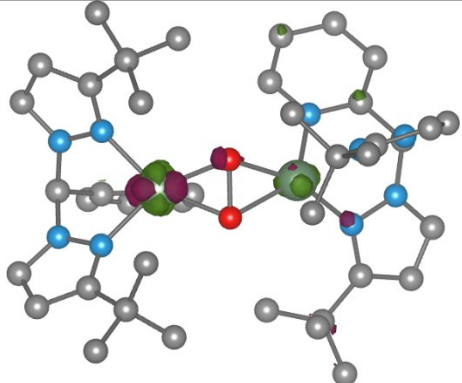   |
|  |  |  | 203 |    |
|  |  |  | 205 |   |
|  |  |  | 206 |  |

|  |  |  |     |                                                                                                                                                                                                                                                                                                                                                                                                                   |
|--|--|--|-----|-------------------------------------------------------------------------------------------------------------------------------------------------------------------------------------------------------------------------------------------------------------------------------------------------------------------------------------------------------------------------------------------------------------------|
|  |  |  | 209 | 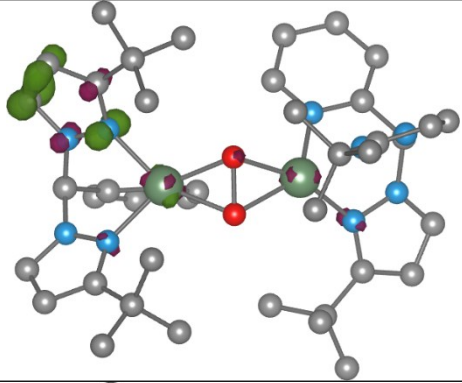 A ball-and-stick model of a complex organic molecule. The structure features a central core with several fused and branched rings. Atoms are color-coded: carbon is grey, oxygen is red, nitrogen is blue, and sulfur is green. The molecule has a complex, multi-ring architecture.                                          |
|  |  |  | 210 |  A ball-and-stick model of a complex organic molecule, similar in structure to 209. It features a central core with fused and branched rings. Atoms are color-coded: carbon is grey, oxygen is red, nitrogen is blue, sulfur is green, and phosphorus is purple. The molecule has a complex, multi-ring architecture.          |
|  |  |  | 211 |  A ball-and-stick model of a complex organic molecule, similar in structure to 209 and 210. It features a central core with fused and branched rings. Atoms are color-coded: carbon is grey, oxygen is red, nitrogen is blue, sulfur is green, and phosphorus is purple. The molecule has a complex, multi-ring architecture. |

## S4: Total Overlap Population for Cu (Fr. 1) and O (Fr. 2) and N ligand (Fr. 3) fragments for all Complexes

### C1 O non-relativistic

Alpha MO: 1 2 3 4 5 6 7 8 9 10  
 HOMO-69 HOMO-68 HOMO-67 HOMO-66 HOMO-65 HOMO-64 HOMO-63 HOMO-62 HOMO-61 HOMO-60  
 Energy(eV): -8792.9 -8792.9 -1062.0 -1062.0 -930.85 -930.85 -930.84 -930.84 -930.27 -930.27  
 Symmetry: A A A A A A A A A A

FRAG# 1: 100.00 100.00 100.05 100.03 100.00 100.00 100.00 100.00 100.00 100.00  
 Net pop.(%) 100.00 100.00 100.10 100.05 100.00 100.00 100.00 100.00 100.00 100.00

FRAG# 2: 0.00 0.00 -0.02 0.00 0.00 0.00 0.00 0.00 0.00 0.00

FRAG# 3: 0.00 0.00 -0.03 -0.02 0.00 0.00 0.00 0.00 0.00 0.00

OP(1 & 2) 0.000 0.000 0.000 0.000 0.000 0.000 0.000 0.000 0.000 0.000  
 OP(1 & 3) 0.000 0.000 -0.001 -0.001 0.000 0.000 0.000 0.000 0.000 0.000  
 OP(2 & 3) 0.000 0.000 0.000 0.000 0.000 0.000 0.000 0.000 0.000 0.000

Alpha MO: 11 12 13 14 15 16 17 18 19 20  
 HOMO-59 HOMO-58 HOMO-57 HOMO-56 HOMO-55 HOMO-54 HOMO-53 HOMO-52 HOMO-51 HOMO-50  
 Energy(eV): -525.73 -525.73 -396.70 -396.70 -396.70 -396.70 -283.65 -283.65 -283.65 -283.65  
 Symmetry: A A A A A A A A A A

FRAG# 1: 0.01 0.01 0.00 0.00 0.01 0.01 0.02 0.01 0.00 0.00

FRAG# 2: 99.99 99.99 0.00 0.00 0.00 0.00 0.00 0.00 0.00 0.00  
 Net pop.(%) 99.99 99.98 0.00 0.00 0.00 0.00 0.00 0.00 0.00 0.00

FRAG# 3: 0.00 0.00 100.00 100.00 99.99 100.00 99.98 99.99 100.00 100.00  
 Net pop.(%) 0.00 0.00 99.99 100.00 99.98 99.99 99.97 99.98 100.00 100.00

OP(1 & 2) 0.000 0.000 0.000 0.000 0.000 0.000 0.000 0.000 0.000 0.000  
 OP(1 & 3) 0.000 0.000 0.000 0.000 0.000 0.000 0.000 0.000 0.000 0.000  
 OP(2 & 3) 0.000 0.000 0.000 0.000 0.000 0.000 0.000 0.000 0.000 0.000

Alpha MO: 21 22 23 24 25 26 27 28 29 30  
 HOMO-49 HOMO-48 HOMO-47 HOMO-46 HOMO-45 HOMO-44 HOMO-43 HOMO-42 HOMO-41 HOMO-40  
 Energy(eV): -126.12 -126.12 -85.29 -85.27 -85.23 -85.22 -84.36 -84.36 -32.72 -32.66  
 Symmetry: A A A A A A A A A A

FRAG# 1: 100.38 100.30 100.04 99.97 100.01 99.98 100.00 100.00 3.68 1.49  
 Net pop.(%) 100.78 100.61 100.08 99.95 100.02 99.97 100.00 100.00 0.84 0.33

FRAG# 2: -0.13 -0.07 0.01 0.03 0.01 0.09 0.01 0.00 7.58 -0.03  
 Net pop.(%) 0.00 0.00 0.00 0.00 0.00 0.00 0.00 0.00 6.51 0.01

FRAG# 3: -0.26 -0.23 -0.05 0.00 -0.02 -0.07 0.00 0.00 88.73 98.54  
 Net pop.(%) 0.01 0.01 0.00 0.00 0.00 0.00 0.00 0.00 86.44 97.41

OP(1 & 2) -0.003 -0.002 0.000 0.001 0.000 0.002 0.000 0.000 0.016 0.000  
 OP(1 & 3) -0.005 -0.005 -0.001 0.000 0.000 -0.002 0.000 0.000 0.041 0.023  
 OP(2 & 3) 0.000 0.000 0.000 0.000 0.000 0.000 0.000 0.000 0.005 -0.001

Alpha MO: 31 32 33 34 35 36 37 38 39 40  
HOMO-39 HOMO-38 HOMO-37 HOMO-36 HOMO-35 HOMO-34 HOMO-33 HOMO-32 HOMO-31 HOMO-30  
Energy(eV): -31.90 -31.74 -31.74 -30.93 -27.05 -27.04 -23.90 -23.90 -21.67 -21.67  
Symmetry: A A A A A A A A A A

FRAG# 1: 5.74 1.41 1.56 4.69 0.71 0.44 0.77 0.91 1.94 2.08  
Net pop.(%) 2.30 0.30 0.33 2.25 0.28 0.18 0.30 0.40 0.83 1.01

FRAG# 2: 84.84 0.76 0.12 94.60 0.03 0.16 0.08 0.03 0.13 0.06  
Net pop.(%) 81.08 0.74 0.02 92.10 0.02 0.27 0.02 0.02 0.06 0.03

FRAG# 3: 9.41 97.83 98.33 0.71 99.27 99.40 99.15 99.06 97.93 97.86  
Net pop.(%) 10.88 96.46 96.98 0.61 98.85 99.17 98.62 98.55 96.75 96.77

OP( 1 & 2 ) 0.087 -0.003 0.000 0.048 0.000 -0.001 0.000 0.000 0.000 0.000  
OP( 1 & 3 ) -0.018 0.025 0.025 0.000 0.008 0.006 0.010 0.010 0.022 0.021  
OP( 2 & 3 ) -0.012 0.003 0.002 0.001 0.000 -0.001 0.001 0.000 0.002 0.000

Alpha MO: 41 42 43 44 45 46 47 48 49 50  
HOMO-29 HOMO-28 HOMO-27 HOMO-26 HOMO-25 HOMO-24 HOMO-23 HOMO-22 HOMO-21 HOMO-20  
Energy(eV): -21.43 -21.41 -21.13 -21.12 -19.37 -19.35 -19.08 -18.99 -18.91 -18.79  
Symmetry: A A A A A A A A A A

FRAG# 1: 4.70 3.54 4.52 4.02 28.04 33.99 3.76 8.30 17.71 29.30  
Net pop.(%) 2.90 1.93 2.87 2.18 20.25 28.83 3.22 7.02 15.41 25.36

FRAG# 2: 0.52 0.01 0.50 0.10 16.94 11.51 0.33 1.14 2.40 8.87  
Net pop.(%) 0.46 0.00 0.50 0.06 11.91 8.98 0.55 1.00 2.57 7.05

FRAG# 3: 94.78 96.45 94.98 95.88 55.02 54.51 95.91 90.55 79.89 61.84  
Net pop.(%) 92.91 94.85 93.29 94.06 49.86 51.95 95.32 89.79 77.24 59.72

OP( 1 & 2 ) 0.000 0.000 0.000 0.001 0.077 0.051 -0.003 0.007 -0.005 0.036  
OP( 1 & 3 ) 0.036 0.032 0.033 0.036 0.079 0.052 0.014 0.019 0.051 0.042  
OP( 2 & 3 ) 0.001 0.000 0.000 0.000 0.024 -0.001 -0.002 -0.004 0.002 0.000

Alpha MO: 51 52 53 54 55 56 57 58 59 60  
HOMO-19 HOMO-18 HOMO-17 HOMO-16 HOMO-15 HOMO-14 HOMO-13 HOMO-12 HOMO-11 HOMO-10  
Energy(eV): -18.45 -18.07 -17.68 -17.61 -17.46 -17.20 -17.03 -16.96 -16.79 -16.72  
Symmetry: A A A A A A A A A A

FRAG# 1: 40.07 21.09 31.81 71.15 28.57 60.29 71.89 25.50 33.01 39.11  
Net pop.(%) 38.88 19.54 29.64 66.22 27.71 57.62 72.43 24.41 32.54 38.55

FRAG# 2: 25.54 16.52 9.20 24.88 15.45 11.13 0.26 0.44 3.61 1.98  
Net pop.(%) 24.27 14.10 8.12 19.43 13.86 8.72 0.21 0.42 3.31 1.95

FRAG# 3: 34.38 62.38 58.99 3.97 55.98 28.58 27.84 74.06 63.38 58.90  
Net pop.(%) 35.87 63.79 57.22 4.23 59.93 28.22 28.33 73.03 63.37 58.43

OP( 1 & 2 ) 0.040 0.054 0.015 0.106 0.064 0.047 0.000 0.001 0.008 0.001  
OP( 1 & 3 ) -0.016 -0.023 0.029 -0.008 -0.047 0.006 -0.011 0.021 0.002 0.010  
OP( 2 & 3 ) -0.014 -0.005 0.007 0.003 -0.032 0.001 0.001 0.000 -0.002 -0.001

Alpha MO: 61 62 63 64 65 66 67 68 69 70  
 HOMO-9 HOMO-8 HOMO-7 HOMO-6 HOMO-5 HOMO-4 HOMO-3 HOMO-2 HOMO-1 HOMO  
 Energy(eV): -16.54 -16.52 -16.48 -15.90 -15.76 -15.04 -15.00 -14.70 -14.31 -13.60  
 Symmetry: A A A A A A A A A A

FRAG# 1: 10.72 93.51 79.55 49.49 58.74 31.20 48.15 13.62 35.31 17.40  
 Net pop.(%) 6.72 93.92 80.36 48.62 58.36 30.56 52.12 13.04 35.32 20.69

FRAG# 2: 26.60 1.27 0.12 3.72 -0.05 51.08 51.31 40.62 63.03 82.29  
 Net pop.(%) 22.34 1.00 0.01 4.22 0.40 52.08 52.69 39.48 62.63 85.40

FRAG# 3: 62.67 5.22 20.34 46.79 41.31 17.72 0.54 45.76 1.66 0.32  
 Net pop.(%) 57.95 5.67 21.25 45.74 40.85 23.78 2.30 47.48 2.38 0.19

OP( 1 & 2 ) 0.035 0.003 0.002 -0.007 -0.005 0.057 -0.036 0.034 0.011 -0.065  
 OP( 1 & 3 ) 0.045 -0.011 -0.018 0.024 0.013 -0.044 -0.043 -0.023 -0.011 -0.001  
 OP( 2 & 3 ) 0.050 0.002 0.000 -0.003 -0.004 -0.077 0.008 -0.011 -0.003 0.003

## C1 O DKH

Alpha MO: 1 2 3 4 5 6 7 8 9 10  
 HOMO-69 HOMO-68 HOMO-67 HOMO-66 HOMO-65 HOMO-64 HOMO-63 HOMO-62 HOMO-61 HOMO-60  
 Energy(eV): -8888.9 -8888.9 -1083.9 -1083.9 -935.64 -935.64 -935.64 -935.64 -935.07 -935.07  
 Symmetry: A A A A A A A A A A

FRAG# 1: 100.00 100.00 100.04 100.02 100.00 100.00 100.00 100.00 100.00 100.00  
 Net pop.(%) 100.00 100.00 100.09 100.05 100.00 100.01 100.00 100.00 100.00 100.00

FRAG# 2: 0.00 0.00 -0.02 0.00 0.00 0.00 0.00 0.00 0.00 0.00

FRAG# 3: 0.00 0.00 -0.03 -0.02 0.00 0.00 0.00 0.00 0.00 0.00

OP( 1 & 2 ) 0.000 0.000 0.000 0.000 0.000 0.000 0.000 0.000 0.000 0.000  
 OP( 1 & 3 ) 0.000 0.000 -0.001 -0.001 0.000 0.000 0.000 0.000 0.000 0.000  
 OP( 2 & 3 ) 0.000 0.000 0.000 0.000 0.000 0.000 0.000 0.000 0.000 0.000

Alpha MO: 11 12 13 14 15 16 17 18 19 20  
 HOMO-59 HOMO-58 HOMO-57 HOMO-56 HOMO-55 HOMO-54 HOMO-53 HOMO-52 HOMO-51 HOMO-50  
 Energy(eV): -526.07 -526.07 -396.92 -396.92 -396.92 -396.92 -283.75 -283.75 -283.75 -283.75  
 Symmetry: A A A A A A A A A A

FRAG# 1: 0.01 0.01 0.00 0.00 0.01 0.01 0.02 0.01 0.00 0.00

FRAG# 2: 99.99 99.99 0.00 0.00 0.00 0.00 0.00 0.00 0.00 0.00  
 Net pop.(%) 99.99 99.98 0.00 0.00 0.00 0.00 0.00 0.00 0.00 0.00

FRAG# 3: 0.00 0.00 100.00 100.00 99.99 99.99 99.98 99.99 100.00 100.00  
 Net pop.(%) 0.00 0.00 99.99 100.00 99.98 99.99 99.97 99.98 100.00 100.00

OP( 1 & 2 ) 0.000 0.000 0.000 0.000 0.000 0.000 0.000 0.000 0.000 0.000  
 OP( 1 & 3 ) 0.000 0.000 0.000 0.000 0.000 0.000 0.000 0.000 0.000 0.000  
 OP( 2 & 3 ) 0.000 0.000 0.000 0.000 0.000 0.000 0.000 0.000 0.000 0.000

Alpha MO: 21 22 23 24 25 26 27 28 29 30  
HOMO-49 HOMO-48 HOMO-47 HOMO-46 HOMO-45 HOMO-44 HOMO-43 HOMO-42 HOMO-41 HOMO-40  
Energy(eV): -129.90 -129.90 -86.39 -86.37 -86.33 -86.32 -85.43 -85.43 -32.76 -32.69  
Symmetry: A A A A A A A A A A

=====

|             |        |        |        |       |        |       |        |        |      |      |
|-------------|--------|--------|--------|-------|--------|-------|--------|--------|------|------|
| FRAG# 1:    | 100.31 | 100.25 | 100.04 | 99.98 | 100.01 | 99.99 | 100.00 | 100.00 | 3.90 | 1.58 |
| Net pop.(%) | 100.64 | 100.51 | 100.09 | 99.96 | 100.02 | 99.98 | 100.00 | 100.01 | 0.90 | 0.34 |

-----

|             |       |       |      |      |      |      |      |      |      |       |
|-------------|-------|-------|------|------|------|------|------|------|------|-------|
| FRAG# 2:    | -0.10 | -0.06 | 0.00 | 0.03 | 0.00 | 0.09 | 0.01 | 0.00 | 8.19 | -0.03 |
| Net pop.(%) | 0.00  | 0.00  | 0.00 | 0.00 | 0.00 | 0.00 | 0.00 | 0.00 | 7.03 | 0.01  |

-----

|             |       |       |       |      |       |       |      |      |       |       |
|-------------|-------|-------|-------|------|-------|-------|------|------|-------|-------|
| FRAG# 3:    | -0.21 | -0.19 | -0.05 | 0.00 | -0.01 | -0.07 | 0.00 | 0.00 | 87.91 | 98.45 |
| Net pop.(%) | 0.01  | 0.01  | 0.00  | 0.00 | 0.00  | 0.00  | 0.00 | 0.00 | 85.53 | 97.25 |

-----

|             |        |        |        |       |       |        |       |       |       |        |
|-------------|--------|--------|--------|-------|-------|--------|-------|-------|-------|--------|
| OP( 1 & 2 ) | -0.002 | -0.001 | 0.000  | 0.001 | 0.000 | 0.002  | 0.000 | 0.000 | 0.018 | 0.000  |
| OP( 1 & 3 ) | -0.004 | -0.004 | -0.001 | 0.000 | 0.000 | -0.001 | 0.000 | 0.000 | 0.042 | 0.025  |
| OP( 2 & 3 ) | 0.000  | 0.000  | 0.000  | 0.000 | 0.000 | 0.000  | 0.000 | 0.000 | 0.005 | -0.001 |

Alpha MO: 31 32 33 34 35 36 37 38 39 40  
HOMO-39 HOMO-38 HOMO-37 HOMO-36 HOMO-35 HOMO-34 HOMO-33 HOMO-32 HOMO-31 HOMO-30  
Energy(eV): -31.95 -31.78 -31.77 -30.96 -27.08 -27.06 -23.91 -23.91 -21.68 -21.67  
Symmetry: A A A A A A A A A A

=====

|             |      |      |      |      |      |      |      |      |      |      |
|-------------|------|------|------|------|------|------|------|------|------|------|
| FRAG# 1:    | 5.82 | 1.39 | 1.56 | 4.61 | 0.72 | 0.45 | 0.77 | 0.90 | 1.91 | 2.04 |
| Net pop.(%) | 2.29 | 0.30 | 0.33 | 2.20 | 0.29 | 0.18 | 0.29 | 0.39 | 0.80 | 0.97 |

-----

|             |       |      |      |       |      |      |      |      |      |      |
|-------------|-------|------|------|-------|------|------|------|------|------|------|
| FRAG# 2:    | 84.01 | 0.80 | 0.12 | 94.64 | 0.03 | 0.16 | 0.08 | 0.03 | 0.14 | 0.06 |
| Net pop.(%) | 80.13 | 0.78 | 0.02 | 92.19 | 0.02 | 0.28 | 0.02 | 0.02 | 0.06 | 0.03 |

-----

|             |       |       |       |      |       |       |       |       |       |       |
|-------------|-------|-------|-------|------|-------|-------|-------|-------|-------|-------|
| FRAG# 3:    | 10.16 | 97.81 | 98.32 | 0.75 | 99.24 | 99.39 | 99.15 | 99.07 | 97.95 | 97.90 |
| Net pop.(%) | 11.71 | 96.45 | 96.96 | 0.66 | 98.82 | 99.15 | 98.62 | 98.56 | 96.76 | 96.81 |

-----

|             |        |        |       |       |       |        |       |       |       |       |
|-------------|--------|--------|-------|-------|-------|--------|-------|-------|-------|-------|
| OP( 1 & 2 ) | 0.090  | -0.002 | 0.000 | 0.048 | 0.000 | -0.001 | 0.000 | 0.000 | 0.000 | 0.000 |
| OP( 1 & 3 ) | -0.019 | 0.024  | 0.025 | 0.000 | 0.008 | 0.006  | 0.010 | 0.010 | 0.022 | 0.021 |
| OP( 2 & 3 ) | -0.012 | 0.003  | 0.002 | 0.001 | 0.000 | -0.001 | 0.001 | 0.000 | 0.002 | 0.000 |

Alpha MO: 41 42 43 44 45 46 47 48 49 50  
HOMO-29 HOMO-28 HOMO-27 HOMO-26 HOMO-25 HOMO-24 HOMO-23 HOMO-22 HOMO-21 HOMO-20  
Energy(eV): -21.44 -21.42 -21.14 -21.13 -19.41 -19.33 -19.09 -18.99 -18.91 -18.78  
Symmetry: A A A A A A A A A A

=====

|             |      |      |      |      |       |       |      |      |       |       |
|-------------|------|------|------|------|-------|-------|------|------|-------|-------|
| FRAG# 1:    | 4.71 | 3.63 | 4.38 | 4.01 | 27.56 | 30.64 | 3.25 | 9.19 | 16.66 | 23.77 |
| Net pop.(%) | 2.87 | 1.93 | 2.73 | 2.12 | 19.57 | 25.82 | 2.74 | 7.74 | 14.37 | 19.77 |

-----

|             |      |      |      |      |       |       |      |      |      |      |
|-------------|------|------|------|------|-------|-------|------|------|------|------|
| FRAG# 2:    | 0.52 | 0.02 | 0.48 | 0.13 | 17.16 | 10.61 | 0.26 | 1.38 | 2.21 | 6.11 |
| Net pop.(%) | 0.48 | 0.01 | 0.50 | 0.08 | 11.99 | 8.27  | 0.46 | 1.20 | 2.37 | 5.01 |

-----

|             |       |       |       |       |       |       |       |       |       |       |
|-------------|-------|-------|-------|-------|-------|-------|-------|-------|-------|-------|
| FRAG# 3:    | 94.76 | 96.35 | 95.14 | 95.87 | 55.28 | 58.75 | 96.49 | 89.43 | 81.13 | 70.12 |
| Net pop.(%) | 92.83 | 94.66 | 93.44 | 94.00 | 50.11 | 56.29 | 95.94 | 88.58 | 78.52 | 67.41 |

-----

|             |       |       |        |       |       |       |        |        |        |        |
|-------------|-------|-------|--------|-------|-------|-------|--------|--------|--------|--------|
| OP( 1 & 2 ) | 0.000 | 0.000 | -0.001 | 0.001 | 0.080 | 0.047 | -0.002 | 0.008  | -0.005 | 0.024  |
| OP( 1 & 3 ) | 0.037 | 0.034 | 0.034  | 0.037 | 0.080 | 0.050 | 0.013  | 0.021  | 0.051  | 0.056  |
| OP( 2 & 3 ) | 0.001 | 0.000 | 0.000  | 0.000 | 0.024 | 0.000 | -0.002 | -0.004 | 0.002  | -0.002 |

Alpha MO: 51 52 53 54 55 56 57 58 59 60  
 HOMO-19 HOMO-18 HOMO-17 HOMO-16 HOMO-15 HOMO-14 HOMO-13 HOMO-12 HOMO-11 HOMO-10  
 Energy(eV): -18.43 -18.05 -17.64 -17.53 -17.44 -17.14 -16.97 -16.93 -16.75 -16.68  
 Symmetry: A A A A A A A A A A

FRAG# 1: 44.18 22.64 30.94 71.14 24.86 50.60 47.66 43.48 35.76 37.80  
 Net pop.(%) 42.93 20.79 28.67 65.91 23.90 48.03 47.52 43.04 35.00 37.13

FRAG# 2: 29.69 17.88 8.73 26.55 16.55 9.80 0.08 0.42 5.66 1.96  
 Net pop.(%) 27.69 15.24 7.77 20.78 14.75 7.70 0.04 0.39 4.91 2.01

FRAG# 3: 26.14 59.48 60.33 2.31 58.59 39.59 52.25 56.10 58.58 60.24  
 Net pop.(%) 28.10 60.87 58.34 2.57 62.72 38.99 52.23 55.64 58.79 59.57

OP( 1 & 2 ) 0.052 0.059 0.012 0.113 0.069 0.041 0.002 0.000 0.017 0.000  
 OP( 1 & 3 ) -0.027 -0.022 0.033 -0.008 -0.050 0.011 0.001 0.009 -0.002 0.014  
 OP( 2 & 3 ) -0.012 -0.006 0.007 0.003 -0.033 0.001 -0.001 0.001 -0.002 -0.001

Alpha MO: 61 62 63 64 65 66 67 68 69 70  
 HOMO-9 HOMO-8 HOMO-7 HOMO-6 HOMO-5 HOMO-4 HOMO-3 HOMO-2 HOMO-1 HOMO  
 Energy(eV): -16.57 -16.39 -16.38 -15.87 -15.73 -15.03 -14.98 -14.69 -14.26 -13.55  
 Symmetry: A A A A A A A A A A

FRAG# 1: 7.16 97.34 85.70 57.91 61.36 34.39 49.84 13.99 36.65 18.31  
 Net pop.(%) 2.82 97.95 86.51 57.29 61.11 33.82 53.95 13.31 36.80 21.74

FRAG# 2: 27.43 0.12 0.13 3.94 0.37 48.57 49.49 41.88 61.65 81.36  
 Net pop.(%) 22.96 0.03 0.02 4.45 1.08 49.28 50.84 40.65 61.38 84.61

FRAG# 3: 65.40 2.54 14.17 38.16 38.27 17.03 0.67 44.13 1.70 0.33  
 Net pop.(%) 60.39 3.23 15.09 37.30 37.90 23.17 2.59 45.82 2.45 0.20

OP( 1 & 2 ) 0.038 0.002 0.002 -0.008 -0.008 0.060 -0.036 0.036 0.009 -0.068  
 OP( 1 & 3 ) 0.049 -0.014 -0.018 0.020 0.013 -0.048 -0.047 -0.022 -0.012 -0.001  
 OP( 2 & 3 ) 0.051 0.000 0.000 -0.003 -0.006 -0.074 0.008 -0.011 -0.003 0.003

## C1 P non-relativistic

Alpha MO: 1 2 3 4 5 6 7 8 9 10  
 HOMO-69 HOMO-68 HOMO-67 HOMO-66 HOMO-65 HOMO-64 HOMO-63 HOMO-62 HOMO-61 HOMO-60  
 Energy(eV): -8791.2 -8791.2 -1060.0 -1060.0 -928.77 -928.77 -928.77 -928.77 -928.49 -928.49  
 Symmetry: A A A A A A A A A A

FRAG# 1: 100.00 100.00 100.03 100.02 100.00 100.00 100.00 100.00 100.00 100.00  
 Net pop.(%) 100.00 100.00 100.05 100.04 100.00 100.00 100.00 100.00 100.00 100.00

FRAG# 2: 0.00 0.00 -0.01 0.00 0.00 0.00 0.00 0.00 0.00 0.00  
 FRAG# 3: 0.00 0.00 -0.02 -0.02 0.00 0.00 0.00 0.00 0.00 0.00

OP( 1 & 2 ) 0.000 0.000 0.000 0.000 0.000 0.000 0.000 0.000 0.000 0.000  
 OP( 1 & 3 ) 0.000 0.000 0.000 0.000 0.000 0.000 0.000 0.000 0.000 0.000  
 OP( 2 & 3 ) 0.000 0.000 0.000 0.000 0.000 0.000 0.000 0.000 0.000 0.000



Alpha MO: 11 12 13 14 15 16 17 18 19 20  
HOMO-59 HOMO-58 HOMO-57 HOMO-56 HOMO-55 HOMO-54 HOMO-53 HOMO-52 HOMO-51 HOMO-50  
Energy(eV): -527.34 -527.34 -396.03 -396.03 -396.03 -396.03 -283.18 -283.18 -283.18 -283.18  
Symmetry: A A A A A A A A A A

=====

FRAG# 1: 0.00 0.00 0.01 0.00 0.00 0.00 0.02 0.01 0.00 0.00

-----

FRAG# 2: 100.00 100.00 0.00 0.00 0.00 0.00 0.00 0.00 0.00 0.00  
Net pop.(%) 100.01 100.00 0.00 0.00 0.00 0.00 0.00 0.00 0.00 0.00

-----

FRAG# 3: 0.00 0.00 99.99 100.00 100.00 100.00 99.98 99.99 100.00 100.00  
Net pop.(%) 0.00 0.00 99.99 99.99 100.00 100.00 99.97 99.98 100.00 100.00

-----

OP( 1 & 2 ) 0.000 0.000 0.000 0.000 0.000 0.000 0.000 0.000 0.000 0.000  
OP( 1 & 3 ) 0.000 0.000 0.000 0.000 0.000 0.000 0.000 0.000 0.000 0.000  
OP( 2 & 3 ) 0.000 0.000 0.000 0.000 0.000 0.000 0.000 0.000 0.000 0.000

Alpha MO: 21 22 23 24 25 26 27 28 29 30  
HOMO-49 HOMO-48 HOMO-47 HOMO-46 HOMO-45 HOMO-44 HOMO-43 HOMO-42 HOMO-41 HOMO-40  
Energy(eV): -124.37 -124.37 -83.47 -83.47 -83.37 -83.37 -82.94 -82.94 -36.30 -32.02  
Symmetry: A A A A A A A A A A

=====

FRAG# 1: 100.36 100.23 100.00 100.01 100.03 100.02 100.00 100.00 1.32 1.37  
Net pop.(%) 100.74 100.46 100.00 100.03 100.05 100.04 99.99 99.99 1.03 0.27

-----

FRAG# 2: -0.15 -0.05 0.03 -0.01 0.02 0.05 0.01 0.00 98.77 -0.03  
Net pop.(%) 0.00 0.00 0.00 0.00 0.00 0.00 0.00 0.00 98.49 0.01

-----

FRAG# 3: -0.22 -0.18 -0.02 -0.01 -0.04 -0.07 0.00 0.00 -0.09 98.66  
Net pop.(%) 0.01 0.01 0.00 0.00 0.00 0.00 0.00 0.00 0.04 97.57

-----

OP( 1 & 2 ) -0.003 -0.001 0.000 0.000 0.000 0.001 0.000 0.000 0.007 0.000  
OP( 1 & 3 ) -0.005 -0.004 -0.001 0.000 -0.001 -0.001 0.000 0.000 -0.001 0.022  
OP( 2 & 3 ) 0.000 0.000 0.000 0.000 0.000 0.000 0.000 0.000 -0.001 0.000

Alpha MO: 31 32 33 34 35 36 37 38 39 40  
HOMO-39 HOMO-38 HOMO-37 HOMO-36 HOMO-35 HOMO-34 HOMO-33 HOMO-32 HOMO-31 HOMO-30  
Energy(eV): -32.02 -31.18 -31.18 -29.04 -26.53 -26.53 -23.36 -23.36 -21.07 -21.06  
Symmetry: A A A A A A A A A A

=====

FRAG# 1: 1.28 1.39 0.96 2.58 0.25 0.45 0.59 0.57 1.41 1.38  
Net pop.(%) 0.25 0.25 0.21 0.87 0.11 0.11 0.19 0.18 0.53 0.50

-----

FRAG# 2: 0.06 0.04 0.00 97.39 0.02 0.01 0.00 0.01 0.01 0.01  
Net pop.(%) 0.14 0.01 0.00 95.65 0.01 0.00 0.00 0.00 0.00 0.00

-----

FRAG# 3: 98.66 98.57 99.03 0.03 99.73 99.55 99.41 99.42 98.58 98.61  
Net pop.(%) 97.59 97.37 98.26 0.01 99.58 99.21 99.01 99.02 97.69 97.72

-----

OP( 1 & 2 ) -0.001 0.000 0.000 0.034 0.000 0.000 0.000 0.000 0.000 0.000  
OP( 1 & 3 ) 0.022 0.023 0.015 0.000 0.003 0.007 0.008 0.008 0.018 0.018  
OP( 2 & 3 ) 0.000 0.001 0.000 0.001 0.000 0.000 0.000 0.000 0.000 0.000

Alpha MO: 41 42 43 44 45 46 47 48 49 50  
HOMO-29 HOMO-28 HOMO-27 HOMO-26 HOMO-25 HOMO-24 HOMO-23 HOMO-22 HOMO-21 HOMO-20  
Energy(eV): -20.87 -20.81 -20.63 -20.53 -19.98 -18.89 -18.61 -18.57 -18.34 -18.26  
Symmetry: A A A A A A A A A A

FRAG# 1: 7.63 2.21 6.66 3.00 13.01 10.53 7.54 2.37 12.87 7.85  
Net pop.(%) 4.16 1.16 3.75 1.64 8.50 7.41 5.94 1.82 10.34 6.24

FRAG# 2: 6.22 0.10 8.32 0.13 58.37 82.89 1.87 0.51 2.57 0.44  
Net pop.(%) 5.00 0.19 6.91 0.33 52.30 80.15 1.41 0.51 2.02 0.53

FRAG# 3: 86.16 97.69 85.02 96.87 28.62 6.58 90.59 97.12 84.56 91.72  
Net pop.(%) 83.81 96.54 83.34 95.34 30.23 5.87 89.41 96.61 82.76 89.99

OP( 1 & 2 ) 0.023 -0.002 0.026 -0.004 0.122 0.052 0.009 0.000 0.013 -0.002  
OP( 1 & 3 ) 0.046 0.023 0.032 0.031 -0.032 0.011 0.023 0.011 0.038 0.034  
OP( 2 & 3 ) 0.001 0.000 0.002 0.000 0.000 0.003 0.000 0.000 -0.002 0.000

Alpha MO: 51 52 53 54 55 56 57 58 59 60  
HOMO-19 HOMO-18 HOMO-17 HOMO-16 HOMO-15 HOMO-14 HOMO-13 HOMO-12 HOMO-11 HOMO-10  
Energy(eV): -18.20 -17.99 -17.95 -17.19 -16.48 -16.44 -16.43 -15.99 -15.89 -15.59  
Symmetry: A A A A A A A A A A

FRAG# 1: 19.29 5.77 8.44 35.66 32.72 3.33 3.27 21.15 27.28 5.98  
Net pop.(%) 13.71 3.43 6.05 31.79 29.37 2.57 2.40 19.27 25.35 2.30

FRAG# 2: 79.12 7.91 3.51 25.73 0.65 0.20 0.02 0.25 0.99 29.48  
Net pop.(%) 73.40 8.38 4.30 21.91 0.93 0.17 0.02 0.75 1.58 26.28

FRAG# 3: 1.59 86.32 88.05 38.61 66.63 96.46 96.71 78.60 71.73 64.54  
Net pop.(%) 1.62 84.10 86.17 39.00 62.76 95.72 95.84 76.31 69.58 61.06

OP( 1 & 2 ) 0.113 -0.004 -0.003 0.081 -0.008 0.001 0.000 -0.009 -0.008 0.034  
OP( 1 & 3 ) -0.002 0.050 0.050 -0.003 0.075 0.015 0.017 0.047 0.047 0.040  
OP( 2 & 3 ) 0.001 -0.006 -0.013 -0.004 0.002 0.000 0.000 -0.001 -0.004 0.030

Alpha MO: 61 62 63 64 65 66 67 68 69 70  
HOMO-9 HOMO-8 HOMO-7 HOMO-6 HOMO-5 HOMO-4 HOMO-3 HOMO-2 HOMO-1 HOMO  
Energy(eV): -15.34 -15.26 -15.12 -15.06 -15.03 -14.71 -14.63 -14.55 -13.22 -12.99  
Symmetry: A A A A A A A A A A

FRAG# 1: 84.82 98.17 96.77 73.51 89.32 85.75 91.55 82.44 12.31 59.23  
Net pop.(%) 83.72 98.46 97.33 75.25 93.86 85.85 91.71 86.95 13.86 67.19

FRAG# 2: 11.54 0.25 0.09 6.89 6.80 0.81 3.00 16.03 87.51 2.22  
Net pop.(%) 9.81 0.04 0.04 7.93 10.26 0.89 2.54 20.05 89.05 5.57

FRAG# 3: 3.64 1.58 3.14 19.61 3.88 13.44 5.45 1.53 0.18 38.56  
Net pop.(%) 4.32 2.07 3.75 21.30 4.92 13.46 5.95 2.11 0.13 43.92

OP( 1 & 2 ) 0.035 0.004 0.001 -0.011 -0.070 -0.002 0.008 -0.079 -0.031 -0.059  
OP( 1 & 3 ) -0.013 -0.010 -0.012 -0.024 -0.021 0.000 -0.011 -0.011 0.000 -0.100  
OP( 2 & 3 ) 0.000 0.000 0.000 -0.010 0.000 0.000 0.001 -0.001 0.001 -0.008

## C1 P DKH

Alpha MO: 1 2 3 4 5 6 7 8 9 10  
HOMO-69 HOMO-68 HOMO-67 HOMO-66 HOMO-65 HOMO-64 HOMO-63 HOMO-62 HOMO-61 HOMO-60  
Energy(eV): -8887.1 -8887.1 -1081.9 -1081.9 -933.54 -933.54 -933.54 -933.27 -933.27  
Symmetry: A A A A A A A A A A

FRAG# 1: 100.00 100.00 100.02 100.02 100.00 100.00 100.00 100.00 100.00 100.00  
Net pop.(%) 100.00 100.00 100.05 100.04 100.00 100.00 100.00 100.00 100.00 100.00

FRAG# 2: 0.00 0.00 -0.01 0.00 0.00 0.00 0.00 0.00 0.00 0.00  
FRAG# 3: 0.00 0.00 -0.02 -0.02 0.00 0.00 0.00 0.00 0.00 0.00  
OP( 1 & 2 ) 0.000 0.000 0.000 0.000 0.000 0.000 0.000 0.000 0.000 0.000  
OP( 1 & 3 ) 0.000 0.000 0.000 0.000 0.000 0.000 0.000 0.000 0.000 0.000  
OP( 2 & 3 ) 0.000 0.000 0.000 0.000 0.000 0.000 0.000 0.000 0.000 0.000

Alpha MO: 11 12 13 14 15 16 17 18 19 20  
HOMO-59 HOMO-58 HOMO-57 HOMO-56 HOMO-55 HOMO-54 HOMO-53 HOMO-52 HOMO-51 HOMO-50  
Energy(eV): -527.68 -527.67 -396.26 -396.26 -396.26 -396.26 -283.29 -283.29 -283.28 -283.28  
Symmetry: A A A A A A A A A A

FRAG# 1: 0.00 0.00 0.01 0.01 0.00 0.00 0.02 0.01 0.00 0.00

FRAG# 2: 100.00 100.00 0.00 0.00 0.00 0.00 0.00 0.00 0.00 0.00  
Net pop.(%) 100.00 100.00 0.00 0.00 0.00 0.00 0.00 0.00 0.00 0.00

FRAG# 3: 0.00 0.00 99.99 99.99 100.00 100.00 99.98 99.99 100.00 100.00  
Net pop.(%) 0.00 0.00 99.99 99.99 100.00 100.00 99.97 99.99 100.00 100.00

OP( 1 & 2 ) 0.000 0.000 0.000 0.000 0.000 0.000 0.000 0.000 0.000 0.000  
OP( 1 & 3 ) 0.000 0.000 0.000 0.000 0.000 0.000 0.000 0.000 0.000 0.000  
OP( 2 & 3 ) 0.000 0.000 0.000 0.000 0.000 0.000 0.000 0.000 0.000 0.000

Alpha MO: 21 22 23 24 25 26 27 28 29 30  
HOMO-49 HOMO-48 HOMO-47 HOMO-46 HOMO-45 HOMO-44 HOMO-43 HOMO-42 HOMO-41 HOMO-40  
Energy(eV): -128.12 -128.12 -84.54 -84.54 -84.44 -84.43 -84.00 -84.00 -36.33 -32.06  
Symmetry: A A A A A A A A A A

FRAG# 1: 100.30 100.18 100.00 100.02 100.03 100.02 100.00 99.99 1.36 1.43  
Net pop.(%) 100.61 100.37 100.01 100.04 100.05 100.04 100.00 99.99 1.01 0.28

FRAG# 2: -0.12 -0.04 0.02 -0.01 0.02 0.05 0.00 0.01 98.73 -0.03  
Net pop.(%) 0.00 0.00 0.00 0.00 0.00 0.00 0.00 0.00 98.39 0.01

FRAG# 3: -0.18 -0.14 -0.02 -0.01 -0.04 -0.07 0.00 0.00 -0.09 98.60  
Net pop.(%) 0.01 0.00 0.00 0.00 0.00 0.00 0.00 0.00 0.04 97.46

OP( 1 & 2 ) -0.002 -0.001 0.000 0.000 0.000 0.001 0.000 0.000 0.008 0.000  
OP( 1 & 3 ) -0.004 -0.003 -0.001 0.000 -0.001 -0.001 0.000 0.000 -0.001 0.023  
OP( 2 & 3 ) 0.000 0.000 0.000 0.000 0.000 0.000 0.000 0.000 -0.001 0.000

Alpha MO: 31 32 33 34 35 36 37 38 39 40  
HOMO-39 HOMO-38 HOMO-37 HOMO-36 HOMO-35 HOMO-34 HOMO-33 HOMO-32 HOMO-31 HOMO-30  
Energy(eV): -32.06 -31.22 -31.22 -29.07 -26.55 -26.55 -23.38 -23.38 -21.08 -21.08  
Symmetry: A A A A A A A A A A

FRAG# 1: 1.32 1.40 0.95 2.54 0.26 0.45 0.57 0.58 1.36 1.40  
Net pop.(%) 0.26 0.25 0.20 0.85 0.12 0.11 0.18 0.19 0.49 0.52

FRAG# 2: 0.06 0.04 0.01 97.43 0.03 0.01 0.01 0.00 0.01 0.01  
Net pop.(%) 0.14 0.01 0.00 95.71 0.01 0.00 0.00 0.00 0.00 0.00

FRAG# 3: 98.62 98.56 99.04 0.03 99.71 99.54 99.42 99.41 98.62 98.59  
Net pop.(%) 97.52 97.35 98.29 0.01 99.55 99.20 99.02 99.01 97.73 97.70

OP( 1 & 2 ) -0.001 0.000 0.000 0.034 0.000 0.000 0.000 0.000 0.000 0.000  
OP( 1 & 3 ) 0.023 0.023 0.015 0.000 0.003 0.007 0.008 0.008 0.018 0.018  
OP( 2 & 3 ) 0.000 0.001 0.000 0.001 0.000 0.000 0.000 0.000 0.000 0.000

Alpha MO: 41 42 43 44 45 46 47 48 49 50  
HOMO-29 HOMO-28 HOMO-27 HOMO-26 HOMO-25 HOMO-24 HOMO-23 HOMO-22 HOMO-21 HOMO-20  
Energy(eV): -20.89 -20.83 -20.65 -20.55 -20.01 -18.87 -18.62 -18.58 -18.34 -18.26  
Symmetry: A A A A A A A A A A

FRAG# 1: 8.47 2.26 6.45 3.00 12.61 10.44 6.46 2.14 12.18 7.22  
Net pop.(%) 4.58 1.16 3.59 1.61 8.05 7.28 5.03 1.62 9.69 5.67

FRAG# 2: 7.30 0.09 8.37 0.12 56.77 82.31 1.58 0.34 2.36 0.15  
Net pop.(%) 5.84 0.20 6.93 0.32 50.60 79.59 1.19 0.36 1.85 0.25

FRAG# 3: 84.23 97.65 85.17 96.88 30.63 7.25 91.96 97.52 85.46 92.63  
Net pop.(%) 81.67 96.45 83.58 95.32 32.28 6.45 90.88 97.02 83.65 90.93

OP( 1 & 2 ) 0.028 -0.002 0.027 -0.004 0.124 0.051 0.007 0.000 0.012 -0.002  
OP( 1 & 3 ) 0.050 0.024 0.030 0.032 -0.033 0.012 0.021 0.010 0.038 0.033  
OP( 2 & 3 ) 0.001 0.000 0.002 0.000 0.000 0.004 0.000 0.000 -0.002 0.000

Alpha MO: 51 52 53 54 55 56 57 58 59 60  
HOMO-19 HOMO-18 HOMO-17 HOMO-16 HOMO-15 HOMO-14 HOMO-13 HOMO-12 HOMO-11 HOMO-10  
Energy(eV): -18.16 -18.02 -17.97 -17.15 -16.45 -16.44 -16.44 -16.00 -15.89 -15.61  
Symmetry: A A A A A A A A A A

FRAG# 1: 18.98 5.77 8.21 36.30 31.40 2.92 2.94 17.83 22.29 6.15  
Net pop.(%) 13.34 3.33 5.77 32.13 27.88 2.17 2.07 15.96 20.29 2.33

FRAG# 2: 80.16 8.76 3.90 26.63 0.60 0.17 0.02 0.24 1.27 29.67  
Net pop.(%) 74.40 9.25 4.74 22.72 0.86 0.15 0.03 0.80 2.02 26.40

FRAG# 3: 0.86 85.47 87.89 37.07 68.00 96.91 97.04 81.92 76.44 64.18  
Net pop.(%) 0.89 83.16 85.98 37.31 64.00 96.17 96.17 79.59 74.13 60.66

OP( 1 & 2 ) 0.114 -0.004 -0.003 0.083 -0.007 0.000 0.000 -0.010 -0.011 0.036  
OP( 1 & 3 ) -0.001 0.052 0.052 0.000 0.078 0.015 0.017 0.048 0.051 0.041  
OP( 2 & 3 ) 0.001 -0.006 -0.014 -0.005 0.002 0.000 0.000 -0.001 -0.004 0.030

Alpha MO: 61 62 63 64 65 66 67 68 69 70  
 HOMO-9 HOMO-8 HOMO-7 HOMO-6 HOMO-5 HOMO-4 HOMO-3 HOMO-2 HOMO-1 HOMO  
 Energy(eV): -15.22 -15.13 -14.98 -14.97 -14.91 -14.62 -14.54 -14.43 -13.17 -12.90  
 Symmetry: A A A A A A A A A A

FRAG# 1: 83.99 98.25 93.12 81.84 89.81 89.50 93.60 83.11 13.63 61.15  
 Net pop.(%) 82.76 98.54 93.88 83.41 94.35 89.69 93.80 87.63 15.30 69.28

FRAG# 2: 12.89 0.25 1.30 5.02 6.57 0.80 2.74 15.36 86.17 2.31  
 Net pop.(%) 11.04 0.03 1.44 5.69 10.01 0.86 2.27 19.39 87.84 5.80

FRAG# 3: 3.11 1.50 5.58 13.13 3.63 9.70 3.66 1.53 0.20 36.54  
 Net pop.(%) 3.77 2.00 6.36 14.74 4.69 9.82 4.28 2.12 0.15 41.95

OP( 1 & 2 ) 0.038 0.004 -0.001 -0.006 -0.069 -0.001 0.009 -0.080 -0.034 -0.062  
 OP( 1 & 3 ) -0.013 -0.010 -0.014 -0.025 -0.022 -0.002 -0.013 -0.011 0.000 -0.101  
 OP( 2 & 3 ) 0.000 0.000 -0.002 -0.007 0.000 0.000 0.001 -0.001 0.001 -0.008

## C2 O non-relativistic

Alpha MO: 1 2 3 4 5 6 7 8 9 10  
 Energy(eV): -8790.0 -8790.0 -1059.1 -1059.1 -927.95 -927.95 -927.95 -927.95 -927.39 -927.39  
 Symmetry: A A A A A A A A A A

FRAG# 1: 100.00 100.00 99.98 99.98 100.00 100.00 100.00 100.00 100.00 100.00  
 Net pop.(%) 100.00 100.00 99.98 99.96 100.01 100.00 100.00 100.00 100.00 100.00

FRAG# 2: 0.00 0.00 0.01 0.01 0.00 0.00 0.00 0.00 0.00 0.00

FRAG# 3: 0.00 0.00 0.02 0.01 0.00 0.00 0.00 0.00 0.00 0.00  
 Net pop.(%) 0.00 0.00 0.03 0.01 0.00 0.00 0.00 0.00 0.00 0.00

OP( 1 & 2 ) 0.000 0.000 0.000 0.000 0.000 0.000 0.000 0.000 0.000 0.000  
 OP( 1 & 3 ) 0.000 0.000 0.000 0.000 0.000 0.000 0.000 0.000 0.000 0.000  
 OP( 2 & 3 ) 0.000 0.000 0.000 0.000 0.000 0.000 0.000 0.000 0.000 0.000

Alpha MO: 11 12 13 14 15 16 17 18 19 20  
 Energy(eV): -522.92 -522.92 -393.63 -393.63 -393.63 -393.63 -393.60 -393.60 -393.60 -393.60  
 Symmetry: A A A A A A A A A A

FRAG# 1: 0.02 0.02 0.00 0.00 0.00 0.00 0.00 0.00 0.00 0.00

FRAG# 2: 99.98 99.98 0.00 0.00 0.00 0.00 0.00 0.00 0.00 0.00  
 Net pop.(%) 99.97 99.97 0.00 0.00 0.00 0.00 0.00 0.00 0.00 0.00

FRAG# 3: 0.00 0.00 100.00 100.00 100.00 100.00 100.00 100.00 100.00 100.00  
 Net pop.(%) 0.00 0.00 100.00 100.00 100.00 100.00 99.99 99.99 99.99 99.99

OP( 1 & 2 ) 0.000 0.000 0.000 0.000 0.000 0.000 0.000 0.000 0.000 0.000  
 OP( 1 & 3 ) 0.000 0.000 0.000 0.000 0.000 0.000 0.000 0.000 0.000 0.000  
 OP( 2 & 3 ) 0.000 0.000 0.000 0.000 0.000 0.000 0.000 0.000 0.000 0.000

Alpha MO: 21 22 23 24 25 26 27 28 29 30  
 Energy(eV): -392.82 -392.82 -392.82 -392.82 -283.14 -283.14 -283.14 -283.14 -280.92 -280.92  
 Symmetry: A A A A A A A A A A

FRAG# 1: 0.01 0.01 0.01 0.01 -0.02 -0.02 -0.02 -0.02 0.00 0.00

FRAG# 2: 0.00 0.00 0.00 0.00 0.00 0.00 0.00 0.00 0.00 0.00

FRAG# 3: 99.99 99.99 99.99 99.99 100.02 100.02 100.02 100.02 100.00 100.00  
 Net pop.(%) 99.98 99.98 99.98 99.98 100.03 100.03 100.03 100.03 100.00 100.00

OP( 1 & 2 ) 0.000 0.000 0.000 0.000 0.000 0.000 0.000 0.000 0.000 0.000  
 OP( 1 & 3 ) 0.000 0.000 0.000 0.000 0.000 0.000 0.000 0.000 0.000 0.000  
 OP( 2 & 3 ) 0.000 0.000 0.000 0.000 0.000 0.000 0.000 0.000 0.000 0.000

Alpha MO: 31 32 33 34 35 36 37 38 39 40  
Energy(eV): -280.92 -280.92 -280.91 -280.91 -280.91 -280.91 -280.84 -280.84 -280.84 -280.84  
Symmetry: A A A A A A A A A A

FRAG# 1: 0.00 0.00 0.00 -0.01 -0.01 -0.01 0.01 0.00 0.01 0.00

FRAG# 2: 0.00 0.00 0.00 0.00 0.00 0.00 0.00 0.00 0.00 0.00

FRAG# 3: 100.00 100.00 100.00 100.01 100.00 100.01 99.99 100.00 99.99 100.00  
Net pop.(%) 100.00 100.00 100.01 100.02 100.01 100.02 99.99 100.00 99.98 100.01

OP( 1 & 2 ) 0.000 0.000 0.000 0.000 0.000 0.000 0.000 0.000 0.000 0.000

OP( 1 & 3 ) 0.000 0.000 0.000 0.000 0.000 0.000 0.000 0.000 0.000 0.000

OP( 2 & 3 ) 0.000 0.000 0.000 0.000 0.000 0.000 0.000 0.000 0.000 0.000

Alpha MO: 41 42 43 44 45 46 47 48 49 50  
Energy(eV): -280.81 -280.81 -280.81 -280.81 -280.80 -280.80 -280.80 -280.80 -279.88 -279.88  
Symmetry: A A A A A A A A A A

FRAG# 1: 0.00 0.00 0.00 0.00 0.00 0.00 0.00 0.00 0.01 0.01

FRAG# 2: 0.00 0.00 0.00 0.00 0.00 0.00 0.00 0.00 0.00 0.00

FRAG# 3: 100.00 100.00 100.00 100.00 100.00 100.00 100.00 100.00 100.00 100.00  
Net pop.(%) 100.00 100.00 100.00 100.00 100.01 100.01 100.00 100.00 99.99 99.99

OP( 1 & 2 ) 0.000 0.000 0.000 0.000 0.000 0.000 0.000 0.000 0.000 0.000

OP( 1 & 3 ) 0.000 0.000 0.000 0.000 0.000 0.000 0.000 0.000 0.000 0.000

OP( 2 & 3 ) 0.000 0.000 0.000 0.000 0.000 0.000 0.000 0.000 0.000 0.000

Alpha MO: 51 52 53 54 55 56 57 58 59 60  
Energy(eV): -123.20 -123.20 -82.35 -82.33 -82.31 -82.31 -81.47 -81.46 -31.80 -31.78  
Symmetry: A A A A A A A A A A

FRAG# 1: 100.40 100.37 100.01 99.94 99.91 99.93 100.03 99.98 -0.22 0.02  
Net pop.(%) 100.83 100.75 100.04 99.90 99.84 99.87 100.08 99.97 0.06 0.04

FRAG# 2: -0.10 -0.08 0.01 0.02 0.07 0.10 0.00 0.00 0.40 -0.03

Net pop.(%) 0.00 0.00 0.00 0.00 0.01 0.00 0.00 0.00 0.27 0.00

FRAG# 3: -0.30 -0.29 -0.03 0.04 0.02 -0.02 -0.03 0.02 99.82 100.01

Net pop.(%) 0.02 0.01 0.01 0.01 0.01 0.01 0.03 0.01 100.06 100.05

OP( 1 & 2 ) -0.002 -0.002 0.000 0.000 0.001 0.002 0.000 0.000 0.001 0.000

OP( 1 & 3 ) -0.006 -0.006 -0.001 0.000 0.000 -0.001 -0.001 0.000 -0.007 0.000

OP( 2 & 3 ) 0.000 0.000 0.000 0.000 0.000 0.000 0.000 0.000 0.002 -0.001

Alpha MO: 61 62 63 64 65 66 67 68 69 70  
Energy(eV): -31.77 -31.76 -29.59 -29.58 -29.57 -29.57 -29.26 -28.89 -28.79 -28.55  
Symmetry: A A A A A A A A A A

FRAG# 1: -0.38 -0.16 0.48 0.37 0.06 0.13 7.52 0.52 -0.03 -0.07

Net pop.(%) 0.02 0.03 0.13 0.02 0.01 0.02 2.41 0.17 0.50 0.13

FRAG# 2: 0.16 0.06 4.66 0.00 0.01 0.42 69.36 -0.03 18.27 2.33

Net pop.(%) 0.10 0.01 4.27 0.00 0.00 0.36 65.17 0.01 18.26 2.19

FRAG# 3: 100.22 100.11 94.87 99.64 99.93 99.45 23.13 99.51 81.76 97.75

Net pop.(%) 100.55 100.24 94.62 99.29 99.88 99.33 22.54 99.19 83.69 97.61

OP( 1 & 2 ) 0.000 0.000 0.005 0.000 0.000 0.000 0.087 0.000 0.014 -0.002

OP( 1 & 3 ) -0.008 -0.004 0.002 0.007 0.001 0.002 0.015 0.007 -0.025 -0.002

OP( 2 & 3 ) 0.001 0.001 0.003 0.000 0.000 0.001 -0.003 -0.001 -0.014 0.005

Alpha MO: 71 72 73 74 75 76 77 78 79 80  
Energy(eV): -28.54 -28.12 -25.68 -25.67 -24.51 -24.48 -24.38 -24.36 -24.16 -24.14  
Symmetry: A A A A A A A A A A

FRAG# 1: 0.10 4.41 -0.24 -0.11 0.13 0.12 -0.02 0.10 0.08 0.10  
Net pop.(%) 0.17 2.00 0.07 0.04 0.02 0.02 0.01 0.01 0.03 0.03

FRAG# 2: 0.06 92.45 0.00 0.09 0.01 0.00 0.01 0.03 0.00 0.02  
Net pop.(%) 0.01 90.06 0.01 0.12 0.01 0.00 0.00 0.04 0.00 0.04

FRAG# 3: 99.84 3.13 100.24 100.03 99.87 99.88 100.01 99.87 99.91 99.88  
Net pop.(%) 99.84 3.23 100.55 100.21 99.75 99.78 100.04 99.80 99.87 99.80

OP( 1 & 2 ) 0.000 0.049 0.000 0.000 0.000 0.000 0.000 0.000 0.000 0.000  
OP( 1 & 3 ) -0.001 -0.001 -0.006 -0.003 0.002 0.002 -0.001 0.002 0.001 0.002  
OP( 2 & 3 ) 0.001 -0.001 0.000 -0.001 0.000 0.000 0.000 0.000 0.000 0.000

Alpha MO: 81 82 83 84 85 86 87 88 89 90  
Energy(eV): -24.04 -23.95 -23.93 -23.88 -23.64 -23.63 -22.48 -22.46 -22.40 -22.35  
Symmetry: A A A A A A A A A A

FRAG# 1: -0.05 0.00 0.03 0.08 0.17 0.05 0.41 0.28 0.02 0.18  
Net pop.(%) 0.01 0.01 0.02 0.02 0.12 0.09 0.23 0.17 0.06 0.04

FRAG# 2: 0.01 0.00 0.01 0.00 0.01 0.06 0.05 0.09 0.02 0.02  
Net pop.(%) 0.00 0.00 0.01 0.00 0.01 0.11 0.07 0.03 0.01 0.03

FRAG# 3: 100.04 100.00 99.96 99.92 99.83 99.89 99.55 99.62 99.96 99.80  
Net pop.(%) 100.08 100.01 99.93 99.87 99.79 99.95 99.41 99.42 100.00 99.65

OP( 1 & 2 ) 0.000 0.000 0.000 0.000 0.000 0.000 0.000 0.000 0.000 0.000  
OP( 1 & 3 ) -0.001 0.000 0.000 0.001 0.001 0.000 0.003 0.002 -0.001 0.003  
OP( 2 & 3 ) 0.000 0.000 0.000 0.000 0.000 -0.001 -0.001 0.002 0.000 0.000

Alpha MO: 91 92 93 94 95 96 97 98 99 100  
Energy(eV): -22.22 -22.19 -20.61 -20.60 -19.54 -19.52 -19.38 -19.32 -19.00 -18.97  
Symmetry: A A A A A A A A A A

FRAG# 1: 0.01 -0.02 0.52 0.61 1.13 1.82 0.28 0.46 1.52 2.21  
Net pop.(%) 0.03 0.02 0.27 0.27 0.50 0.73 0.37 0.51 0.90 1.04

FRAG# 2: -0.01 0.01 0.07 0.10 0.06 0.18 0.03 0.02 0.13 0.40  
Net pop.(%) 0.00 0.01 0.10 0.05 0.15 0.10 0.04 0.01 0.35 0.23

FRAG# 3: 100.00 100.01 99.40 99.29 98.81 98.01 99.69 99.52 98.35 97.39  
Net pop.(%) 100.04 100.06 99.19 98.94 98.13 96.94 99.76 99.58 97.73 96.21

OP( 1 & 2 ) 0.000 0.000 0.000 0.000 -0.001 0.001 0.000 0.000 -0.002 0.002  
OP( 1 & 3 ) 0.000 -0.001 0.005 0.006 0.014 0.021 -0.001 -0.001 0.015 0.022  
OP( 2 & 3 ) 0.000 0.000 -0.001 0.001 0.000 0.001 0.000 0.000 -0.002 0.002

Alpha MO: 101 102 103 104 105 106 107 108 109 110  
Energy(eV): -18.68 -18.65 -18.53 -18.47 -18.29 -18.20 -18.12 -18.06 -17.81 -17.78  
Symmetry: A A A A A A A A A A

FRAG# 1: 0.72 0.37 0.38 1.15 3.89 2.84 2.68 1.53 -0.02 0.26  
Net pop.(%) 0.42 0.17 0.30 0.78 2.82 2.07 1.75 1.04 0.18 0.19

FRAG# 2: 0.05 0.09 0.15 0.31 0.25 0.16 2.04 0.78 0.42 1.09  
Net pop.(%) 0.03 0.04 0.07 0.19 0.16 0.23 1.21 0.83 0.47 0.62

FRAG# 3: 99.23 99.54 99.47 98.54 95.86 97.00 95.28 97.69 99.60 98.65  
Net pop.(%) 98.94 99.31 99.30 98.16 94.88 96.11 94.12 97.24 99.82 98.24

OP( 1 & 2 ) 0.000 0.000 0.000 0.001 0.002 -0.002 0.006 0.000 0.000 0.001  
OP( 1 & 3 ) 0.006 0.004 0.002 0.006 0.020 0.017 0.012 0.010 -0.004 0.000  
OP( 2 & 3 ) 0.000 0.001 0.002 0.001 0.000 0.000 0.011 -0.001 -0.001 0.008

Alpha MO: 111 112 113 114 115 116 117 118 119 120  
HOMO-75 HOMO-74 HOMO-73 HOMO-72 HOMO-71 HOMO-70 HOMO-69 HOMO-68 HOMO-67 HOMO-66  
Energy(eV): -17.27 -17.26 -17.10 -17.03 -16.98 -16.96 -16.87 -16.87 -16.70 -16.69  
Symmetry: A A A A A A A A A A

FRAG# 1: 1.29 0.98 2.65 0.19 0.90 0.40 1.05 0.74 1.41 4.60  
Net pop.(%) 0.78 0.60 1.62 0.13 0.71 0.35 0.82 0.56 1.07 3.72

FRAG# 2: 0.78 0.29 1.68 0.32 0.24 0.20 0.20 0.01 0.18 0.68  
Net pop.(%) 0.45 0.20 1.11 0.17 0.33 0.15 0.13 0.03 0.13 0.56

FRAG# 3: 97.93 98.73 95.67 99.48 98.87 99.40 98.75 99.24 98.41 94.72  
Net pop.(%) 97.29 98.26 94.68 99.29 98.77 99.36 98.55 99.07 98.03 94.09

OP( 1 & 2 ) 0.002 0.000 0.006 0.000 0.000 0.001 0.001 0.000 0.000 0.004  
OP( 1 & 3 ) 0.008 0.007 0.014 0.001 0.004 0.000 0.004 0.004 0.007 0.014  
OP( 2 & 3 ) 0.005 0.002 0.005 0.003 -0.002 0.000 0.000 0.000 0.001 -0.001

Alpha MO: 121 122 123 124 125 126 127 128 129 130  
HOMO-65 HOMO-64 HOMO-63 HOMO-62 HOMO-61 HOMO-60 HOMO-59 HOMO-58 HOMO-57 HOMO-56  
Energy(eV): -16.60 -16.58 -16.46 -16.45 -16.29 -16.27 -16.14 -15.95 -15.90 -15.80  
Symmetry: A A A A A A A A A A

FRAG# 1: 0.89 1.31 1.89 0.37 3.01 0.98 9.48 7.90 40.52 2.65  
Net pop.(%) 0.63 1.05 1.41 0.23 2.44 0.69 7.20 6.64 35.91 2.33

FRAG# 2: 0.37 0.08 1.13 0.29 0.37 0.60 7.34 2.42 16.14 0.41  
Net pop.(%) 0.32 0.12 0.76 0.17 0.28 0.34 5.47 1.99 13.52 0.42

FRAG# 3: 98.74 98.62 96.99 99.34 96.63 98.42 83.18 89.68 43.33 96.94  
Net pop.(%) 98.43 98.33 96.61 99.14 96.06 97.86 82.08 88.95 42.40 96.61

OP( 1 & 2 ) 0.000 -0.001 0.005 0.001 0.001 0.000 0.031 0.010 0.063 0.000  
OP( 1 & 3 ) 0.005 0.006 0.005 0.002 0.011 0.006 0.015 0.016 0.029 0.007  
OP( 2 & 3 ) 0.001 0.000 0.003 0.002 0.001 0.005 0.007 -0.001 -0.011 0.000

Alpha MO: 131 132 133 134 135 136 137 138 139 140  
HOMO-55 HOMO-54 HOMO-53 HOMO-52 HOMO-51 HOMO-50 HOMO-49 HOMO-48 HOMO-47 HOMO-46  
Energy(eV): -15.78 -15.72 -15.68 -15.62 -15.59 -15.56 -15.52 -15.49 -15.41 -15.36  
Symmetry: A A A A A A A A A A

FRAG# 1: 40.32 2.20 9.56 7.64 11.69 4.83 6.21 1.60 0.35 3.35  
Net pop.(%) 37.28 1.71 8.13 7.15 9.80 4.04 5.40 1.47 0.26 2.93

FRAG# 2: 27.67 0.29 1.16 3.09 7.30 4.43 6.53 0.81 0.01 1.86  
Net pop.(%) 24.02 0.20 1.01 2.75 5.79 3.47 5.36 0.84 0.00 1.48

FRAG# 3: 32.00 97.51 89.28 89.26 81.02 90.74 87.26 97.60 99.65 94.79  
Net pop.(%) 32.69 97.04 87.99 89.53 80.73 90.53 87.18 97.52 99.55 94.78

OP( 1 & 2 ) 0.074 0.001 0.003 0.011 0.031 0.015 0.019 0.000 0.000 0.008  
OP( 1 & 3 ) -0.013 0.009 0.026 -0.001 0.007 0.000 -0.003 0.002 0.002 0.001  
OP( 2 & 3 ) -0.001 0.001 0.000 -0.004 -0.001 0.004 0.004 -0.001 0.000 0.000



Alpha MO: 141 142 143 144 145 146 147 148 149 150  
HOMO-45 HOMO-44 HOMO-43 HOMO-42 HOMO-41 HOMO-40 HOMO-39 HOMO-38 HOMO-37 HOMO-36  
Energy(eV): -15.34 -15.26 -15.26 -15.24 -15.15 -15.09 -15.06 -14.99 -14.93 -14.91  
Symmetry: A A A A A A A A A A

FRAG# 1: 2.08 1.41 0.97 11.53 1.93 0.09 2.50 9.52 2.11 9.89  
Net pop.(%) 1.74 1.05 0.71 10.52 1.39 0.07 2.34 8.69 1.69 8.86

FRAG# 2: 0.27 1.56 0.65 2.56 0.05 0.00 2.70 1.92 5.65 3.05  
Net pop.(%) 0.41 1.29 0.45 2.48 0.14 0.00 2.45 1.52 4.64 2.55

FRAG# 3: 97.65 97.02 98.38 85.91 98.02 99.91 94.80 88.57 92.24 87.06  
Net pop.(%) 97.33 96.94 98.09 84.84 97.43 99.90 94.93 88.27 91.94 86.67

OP( 1 & 2 ) -0.001 0.006 0.002 0.000 -0.001 0.000 0.005 0.009 0.011 0.012  
OP( 1 & 3 ) 0.008 0.002 0.003 0.020 0.012 0.000 -0.002 0.007 -0.003 0.009  
OP( 2 & 3 ) -0.001 0.000 0.002 0.001 0.000 0.000 0.000 -0.001 0.009 -0.001

Alpha MO: 151 152 153 154 155 156 157 158 159 160  
HOMO-35 HOMO-34 HOMO-33 HOMO-32 HOMO-31 HOMO-30 HOMO-29 HOMO-28 HOMO-27 HOMO-26  
Energy(eV): -14.90 -14.83 -14.80 -14.79 -14.76 -14.68 -14.61 -14.61 -14.39 -14.33  
Symmetry: A A A A A A A A A A

FRAG# 1: 4.68 26.86 7.07 0.98 2.18 0.92 4.35 39.86 22.24 25.21  
Net pop.(%) 4.20 24.99 6.30 0.85 1.36 0.86 4.02 37.92 20.58 23.71

FRAG# 2: 0.03 7.71 0.25 0.01 8.53 0.12 1.84 8.47 1.67 7.08  
Net pop.(%) 0.15 6.13 0.69 0.01 6.95 0.14 1.45 6.93 2.30 6.07

FRAG# 3: 95.28 65.44 92.68 99.02 89.29 98.96 93.81 51.67 76.09 67.71  
Net pop.(%) 94.73 65.37 91.67 98.88 88.38 98.92 93.47 51.74 74.27 67.41

OP( 1 & 2 ) -0.002 0.034 -0.007 0.000 0.015 0.000 0.004 0.035 -0.008 0.022  
OP( 1 & 3 ) 0.012 0.004 0.022 0.003 0.001 0.001 0.003 0.003 0.041 0.008  
OP( 2 & 3 ) -0.001 -0.002 -0.002 0.000 0.017 0.000 0.004 -0.005 -0.005 -0.002

Alpha MO: 161 162 163 164 165 166 167 168 169 170  
HOMO-25 HOMO-24 HOMO-23 HOMO-22 HOMO-21 HOMO-20 HOMO-19 HOMO-18 HOMO-17 HOMO-16  
Energy(eV): -14.26 -14.22 -13.97 -13.91 -13.81 -13.65 -13.46 -13.37 -13.31 -13.16  
Symmetry: A A A A A A A A A A

FRAG# 1: 68.73 6.69 50.61 42.44 61.14 80.26 5.41 23.94 48.94 13.33  
Net pop.(%) 66.21 6.33 51.63 41.83 60.97 80.62 5.08 24.11 50.63 14.16

FRAG# 2: 12.62 1.67 0.11 3.87 3.88 0.37 3.48 5.62 3.86 1.00  
Net pop.(%) 10.21 1.72 0.08 3.53 4.01 0.35 2.86 6.50 3.98 1.70

FRAG# 3: 18.65 91.64 49.28 53.69 34.98 19.36 91.12 70.44 47.20 85.67  
Net pop.(%) 19.11 91.78 50.49 53.36 35.49 19.82 90.55 72.69 47.90 86.90

OP( 1 & 2 ) 0.054 0.005 0.002 0.006 0.005 0.001 0.004 0.012 -0.011 -0.003  
OP( 1 & 3 ) -0.004 0.003 -0.023 0.006 -0.002 -0.008 0.003 -0.015 -0.023 -0.014  
OP( 2 & 3 ) -0.006 -0.006 -0.002 0.001 -0.008 -0.001 0.009 -0.030 0.009 -0.011

Alpha MO: 171 172 173 174 175 176 177 178 179 180  
HOMO-15 HOMO-14 HOMO-13 HOMO-12 HOMO-11 HOMO-10 HOMO-9 HOMO-8 HOMO-7 HOMO-6  
Energy(eV): -12.86 -12.85 -12.60 -12.45 -12.34 -11.82 -11.78 -11.14 -11.10 -11.05  
Symmetry: A A A A A A A A A A

=====

|             |       |       |      |       |       |      |       |      |      |      |
|-------------|-------|-------|------|-------|-------|------|-------|------|------|------|
| FRAG# 1:    | 26.67 | 35.05 | 4.01 | 46.32 | 41.39 | 6.97 | 25.51 | 3.16 | 4.17 | 0.30 |
| Net pop.(%) | 25.36 | 34.13 | 2.51 | 45.49 | 42.38 | 6.36 | 25.24 | 4.18 | 4.08 | 0.37 |

-----

|             |      |       |       |       |       |       |       |       |      |      |
|-------------|------|-------|-------|-------|-------|-------|-------|-------|------|------|
| FRAG# 2:    | 3.80 | -0.14 | 13.80 | 43.52 | 44.75 | 38.31 | 48.05 | 26.40 | 0.26 | 1.28 |
| Net pop.(%) | 4.34 | 0.14  | 13.26 | 42.97 | 46.26 | 36.53 | 48.85 | 27.35 | 0.59 | 1.53 |

-----

|             |       |       |       |       |       |       |       |       |       |       |
|-------------|-------|-------|-------|-------|-------|-------|-------|-------|-------|-------|
| FRAG# 3:    | 69.52 | 65.09 | 82.19 | 10.16 | 13.86 | 54.73 | 26.44 | 70.44 | 95.58 | 98.42 |
| Net pop.(%) | 68.01 | 64.07 | 82.12 | 15.36 | 13.88 | 54.22 | 28.17 | 70.74 | 95.30 | 99.02 |

-----

|           |        |        |        |        |        |        |        |        |        |        |
|-----------|--------|--------|--------|--------|--------|--------|--------|--------|--------|--------|
| OP(1 & 2) | -0.007 | -0.004 | 0.020  | 0.066  | -0.025 | 0.019  | 0.012  | -0.017 | -0.005 | 0.003  |
| OP(1 & 3) | 0.034  | 0.022  | 0.010  | -0.049 | 0.005  | -0.007 | -0.007 | -0.004 | 0.007  | -0.004 |
| OP(2 & 3) | -0.003 | -0.002 | -0.009 | -0.055 | -0.005 | 0.017  | -0.028 | -0.002 | -0.001 | -0.008 |

Alpha MO: 181 182 183 184 185 186 187 188 189 190  
HOMO-5 HOMO-4 HOMO-3 HOMO-2 HOMO-1 HOMO LUMO LUMO+1 LUMO+2 LUMO+3  
Energy(eV): -10.98 -10.96 -10.93 -10.90 -10.87 -10.76 -8.45 -8.01 -5.18 -5.18  
Symmetry: A A A A A A A A A A

=====

|             |      |      |      |      |       |       |       |       |      |       |
|-------------|------|------|------|------|-------|-------|-------|-------|------|-------|
| FRAG# 1:    | 4.31 | 2.58 | 5.52 | 1.96 | 11.74 | 11.50 | 36.07 | 38.05 | 7.05 | 10.17 |
| Net pop.(%) | 5.23 | 2.93 | 6.49 | 2.32 | 15.77 | 13.33 | 48.10 | 49.70 | 9.54 | 12.18 |

-----

|             |      |      |       |      |       |       |       |       |      |      |
|-------------|------|------|-------|------|-------|-------|-------|-------|------|------|
| FRAG# 2:    | 2.86 | 2.51 | 37.34 | 1.08 | 17.75 | 14.98 | 44.35 | 34.05 | 0.24 | 1.57 |
| Net pop.(%) | 3.45 | 2.87 | 39.05 | 1.14 | 18.39 | 16.89 | 53.85 | 43.31 | 0.46 | 4.15 |

-----

|             |       |       |       |       |       |       |       |       |       |       |
|-------------|-------|-------|-------|-------|-------|-------|-------|-------|-------|-------|
| FRAG# 3:    | 92.83 | 94.91 | 57.14 | 96.96 | 70.51 | 73.52 | 19.58 | 27.90 | 92.71 | 88.26 |
| Net pop.(%) | 93.84 | 95.40 | 57.31 | 97.49 | 72.18 | 75.74 | 23.33 | 40.30 | 95.54 | 88.16 |

-----

|           |        |        |        |        |        |        |        |        |        |        |
|-----------|--------|--------|--------|--------|--------|--------|--------|--------|--------|--------|
| OP(1 & 2) | -0.005 | -0.002 | -0.025 | 0.001  | -0.030 | -0.015 | -0.178 | -0.085 | 0.001  | -0.047 |
| OP(1 & 3) | -0.013 | -0.005 | 0.006  | -0.008 | -0.051 | -0.021 | -0.063 | -0.148 | -0.051 | 0.007  |
| OP(2 & 3) | -0.007 | -0.005 | -0.009 | -0.002 | 0.017  | -0.023 | -0.012 | -0.100 | -0.006 | -0.005 |



Alpha MO: 41 42 43 44 45 46 47 48 49 50  
Energy(eV): -280.90 -280.90 -280.90 -280.90 -280.88 -280.88 -280.88 -280.88 -279.97 -279.97  
Symmetry: A A A A A A A A A A

FRAG# 1: 0.00 0.00 0.00 0.00 0.00 0.00 0.00 0.00 0.01 0.01  
FRAG# 2: 0.00 0.00 0.00 0.00 0.00 0.00 0.00 0.00 0.00 0.00

FRAG# 3: 100.00 100.00 100.00 100.00 100.00 100.00 100.00 100.00 99.99 99.99  
Net pop.(%) 100.00 100.00 100.00 100.00 100.01 100.01 100.00 100.00 99.99 99.99

OP( 1 & 2 ) 0.000 0.000 0.000 0.000 0.000 0.000 0.000 0.000 0.000 0.000  
OP( 1 & 3 ) 0.000 0.000 0.000 0.000 0.000 0.000 0.000 0.000 0.000 0.000  
OP( 2 & 3 ) 0.000 0.000 0.000 0.000 0.000 0.000 0.000 0.000 0.000 0.000

Alpha MO: 51 52 53 54 55 56 57 58 59 60  
Energy(eV): -127.00 -127.00 -83.46 -83.45 -83.42 -83.42 -82.55 -82.55 -31.82 -31.80  
Symmetry: A A A A A A A A A A

FRAG# 1: 100.30 100.27 100.02 99.94 99.91 99.93 100.03 99.98 -0.19 0.04  
Net pop.(%) 100.61 100.54 100.05 99.90 99.84 99.87 100.09 99.96 0.07 0.04

FRAG# 2: -0.07 -0.05 0.01 0.02 0.06 0.09 0.00 0.00 0.42 -0.03  
Net pop.(%) 0.00 0.00 0.00 0.00 0.01 0.00 0.00 0.00 0.28 0.00

FRAG# 3: -0.22 -0.22 -0.03 0.04 0.02 -0.02 -0.03 0.02 99.77 99.99  
Net pop.(%) 0.01 0.01 0.01 0.01 0.01 0.01 0.04 0.01 99.97 100.02

OP( 1 & 2 ) -0.002 -0.001 0.000 0.000 0.001 0.002 0.000 0.000 0.001 0.000  
OP( 1 & 3 ) -0.005 -0.005 -0.001 0.000 0.000 -0.001 -0.001 0.000 -0.006 0.000  
OP( 2 & 3 ) 0.000 0.000 0.000 0.000 0.000 0.000 0.000 0.000 0.002 -0.001

Alpha MO: 61 62 63 64 65 66 67 68 69 70  
Energy(eV): -31.78 -31.77 -29.61 -29.60 -29.59 -29.58 -29.32 -28.91 -28.82 -28.58  
Symmetry: A A A A A A A A A A

FRAG# 1: -0.38 -0.16 0.64 0.37 0.06 0.13 7.63 0.58 -0.08 -0.09  
Net pop.(%) 0.02 0.03 0.17 0.02 0.01 0.02 2.47 0.17 0.45 0.13

FRAG# 2: 0.16 0.06 6.00 0.00 0.01 0.44 69.64 -0.03 16.48 2.63  
Net pop.(%) 0.10 0.01 5.51 0.00 0.00 0.37 65.38 0.01 16.50 2.48

FRAG# 3: 100.23 100.10 93.37 99.62 99.93 99.44 22.73 99.44 83.60 97.46  
Net pop.(%) 100.57 100.23 93.08 99.27 99.88 99.31 22.35 99.07 85.43 97.34

OP( 1 & 2 ) 0.000 0.000 0.007 0.000 0.000 0.000 0.090 0.000 0.013 -0.002  
OP( 1 & 3 ) -0.008 -0.004 0.003 0.007 0.001 0.002 0.013 0.008 -0.023 -0.002  
OP( 2 & 3 ) 0.001 0.001 0.003 0.000 0.000 0.001 -0.005 -0.001 -0.013 0.005

Alpha MO: 71 72 73 74 75 76 77 78 79 80  
Energy(eV): -28.56 -28.16 -25.69 -25.69 -24.52 -24.49 -24.39 -24.37 -24.16 -24.15  
Symmetry: A A A A A A A A A A

FRAG# 1: 0.09 4.33 -0.25 -0.11 0.13 0.12 -0.02 0.10 0.08 0.10  
Net pop.(%) 0.17 1.95 0.07 0.04 0.02 0.02 0.01 0.01 0.03 0.03

FRAG# 2: 0.06 92.22 0.00 0.09 0.01 0.00 0.01 0.03 0.00 0.02  
Net pop.(%) 0.01 89.89 0.01 0.12 0.01 0.00 0.00 0.04 0.00 0.04

FRAG# 3: 99.85 3.45 100.24 100.03 99.86 99.88 100.01 99.86 99.92 99.88  
Net pop.(%) 99.85 3.58 100.57 100.21 99.75 99.77 100.04 99.79 99.87 99.80

OP( 1 & 2 ) 0.000 0.048 0.000 0.000 0.000 0.000 0.000 0.000 0.000 0.000  
OP( 1 & 3 ) -0.001 -0.001 -0.006 -0.003 0.002 0.002 -0.001 0.002 0.001 0.002  
OP( 2 & 3 ) 0.001 -0.002 0.000 -0.001 0.000 0.000 0.000 0.000 0.000 0.000

Alpha MO: 81 82 83 84 85 86 87 88 89 90  
Energy(eV): -24.05 -23.96 -23.94 -23.89 -23.65 -23.64 -22.49 -22.47 -22.40 -22.36  
Symmetry: A A A A A A A A A A

=====

|             |       |      |      |      |      |      |      |      |      |      |
|-------------|-------|------|------|------|------|------|------|------|------|------|
| FRAG# 1:    | -0.04 | 0.00 | 0.03 | 0.08 | 0.18 | 0.06 | 0.40 | 0.28 | 0.02 | 0.18 |
| Net pop.(%) | 0.01  | 0.01 | 0.02 | 0.02 | 0.13 | 0.09 | 0.23 | 0.17 | 0.06 | 0.04 |

-----

|             |      |      |      |      |      |      |      |      |      |      |
|-------------|------|------|------|------|------|------|------|------|------|------|
| FRAG# 2:    | 0.01 | 0.00 | 0.01 | 0.00 | 0.01 | 0.06 | 0.05 | 0.10 | 0.02 | 0.02 |
| Net pop.(%) | 0.00 | 0.00 | 0.01 | 0.00 | 0.01 | 0.12 | 0.07 | 0.03 | 0.01 | 0.03 |

-----

|             |        |        |       |       |       |       |       |       |        |       |
|-------------|--------|--------|-------|-------|-------|-------|-------|-------|--------|-------|
| FRAG# 3:    | 100.03 | 99.99  | 99.95 | 99.92 | 99.81 | 99.87 | 99.55 | 99.62 | 99.96  | 99.80 |
| Net pop.(%) | 100.08 | 100.00 | 99.93 | 99.86 | 99.76 | 99.91 | 99.43 | 99.42 | 100.00 | 99.65 |

-----

|             |        |       |       |       |       |        |        |       |        |       |
|-------------|--------|-------|-------|-------|-------|--------|--------|-------|--------|-------|
| OP( 1 & 2 ) | 0.000  | 0.000 | 0.000 | 0.000 | 0.000 | 0.000  | 0.000  | 0.000 | 0.000  | 0.000 |
| OP( 1 & 3 ) | -0.001 | 0.000 | 0.000 | 0.001 | 0.001 | 0.000  | 0.003  | 0.002 | -0.001 | 0.003 |
| OP( 2 & 3 ) | 0.000  | 0.000 | 0.000 | 0.000 | 0.000 | -0.001 | -0.001 | 0.002 | 0.000  | 0.000 |

Alpha MO: 91 92 93 94 95 96 97 98 99 100  
Energy(eV): -22.23 -22.20 -20.62 -20.60 -19.54 -19.53 -19.39 -19.32 -19.01 -18.98  
Symmetry: A A A A A A A A A A

=====

|             |      |       |      |      |      |      |      |      |      |      |
|-------------|------|-------|------|------|------|------|------|------|------|------|
| FRAG# 1:    | 0.01 | -0.02 | 0.52 | 0.61 | 1.20 | 2.00 | 0.27 | 0.44 | 1.62 | 2.37 |
| Net pop.(%) | 0.03 | 0.02  | 0.26 | 0.27 | 0.53 | 0.80 | 0.36 | 0.50 | 0.93 | 1.11 |

-----

|             |       |      |      |      |      |      |      |      |      |      |
|-------------|-------|------|------|------|------|------|------|------|------|------|
| FRAG# 2:    | -0.01 | 0.00 | 0.07 | 0.10 | 0.07 | 0.21 | 0.03 | 0.02 | 0.14 | 0.44 |
| Net pop.(%) | 0.00  | 0.01 | 0.10 | 0.05 | 0.17 | 0.12 | 0.04 | 0.01 | 0.37 | 0.25 |

-----

|             |        |        |       |       |       |       |       |       |       |       |
|-------------|--------|--------|-------|-------|-------|-------|-------|-------|-------|-------|
| FRAG# 3:    | 100.01 | 100.01 | 99.41 | 99.29 | 98.73 | 97.79 | 99.70 | 99.54 | 98.24 | 97.19 |
| Net pop.(%) | 100.04 | 100.06 | 99.20 | 98.93 | 98.00 | 96.61 | 99.78 | 99.61 | 97.55 | 95.93 |

-----

|             |       |        |        |       |        |       |        |        |        |       |
|-------------|-------|--------|--------|-------|--------|-------|--------|--------|--------|-------|
| OP( 1 & 2 ) | 0.000 | 0.000  | 0.000  | 0.000 | -0.002 | 0.001 | 0.000  | 0.000  | -0.002 | 0.002 |
| OP( 1 & 3 ) | 0.000 | -0.001 | 0.005  | 0.006 | 0.015  | 0.023 | -0.002 | -0.001 | 0.016  | 0.023 |
| OP( 2 & 3 ) | 0.000 | 0.000  | -0.001 | 0.001 | 0.000  | 0.001 | 0.000  | 0.000  | -0.002 | 0.002 |

Alpha MO: 101 102 103 104 105 106 107 108 109 110  
Energy(eV): -18.68 -18.65 -18.53 -18.47 -18.29 -18.20 -18.12 -18.05 -17.80 -17.78  
Symmetry: A A A A A A A A A A

=====

|             |      |      |      |      |      |      |      |      |       |      |
|-------------|------|------|------|------|------|------|------|------|-------|------|
| FRAG# 1:    | 0.71 | 0.37 | 0.37 | 1.10 | 3.71 | 2.74 | 2.78 | 1.52 | -0.02 | 0.26 |
| Net pop.(%) | 0.41 | 0.17 | 0.29 | 0.75 | 2.67 | 1.98 | 1.80 | 1.01 | 0.18  | 0.18 |

-----

|             |      |      |      |      |      |      |      |      |      |      |
|-------------|------|------|------|------|------|------|------|------|------|------|
| FRAG# 2:    | 0.05 | 0.09 | 0.15 | 0.31 | 0.23 | 0.15 | 2.13 | 0.77 | 0.42 | 1.09 |
| Net pop.(%) | 0.03 | 0.04 | 0.08 | 0.19 | 0.15 | 0.22 | 1.26 | 0.83 | 0.47 | 0.61 |

-----

|             |       |       |       |       |       |       |       |       |       |       |
|-------------|-------|-------|-------|-------|-------|-------|-------|-------|-------|-------|
| FRAG# 3:    | 99.25 | 99.54 | 99.48 | 98.59 | 96.06 | 97.11 | 95.09 | 97.72 | 99.60 | 98.65 |
| Net pop.(%) | 98.95 | 99.31 | 99.31 | 98.22 | 95.10 | 96.25 | 93.91 | 97.25 | 99.83 | 98.24 |

-----

|             |       |       |       |       |       |        |       |        |        |       |
|-------------|-------|-------|-------|-------|-------|--------|-------|--------|--------|-------|
| OP( 1 & 2 ) | 0.000 | 0.000 | 0.000 | 0.001 | 0.002 | -0.002 | 0.007 | 0.000  | 0.000  | 0.001 |
| OP( 1 & 3 ) | 0.006 | 0.004 | 0.002 | 0.006 | 0.019 | 0.017  | 0.013 | 0.010  | -0.004 | 0.000 |
| OP( 2 & 3 ) | 0.000 | 0.001 | 0.002 | 0.001 | 0.000 | 0.000  | 0.011 | -0.001 | -0.001 | 0.008 |

Alpha MO: 111 112 113 114 115 116 117 118 119 120  
HOMO-75 HOMO-74 HOMO-73 HOMO-72 HOMO-71 HOMO-70 HOMO-69 HOMO-68 HOMO-67 HOMO-66  
Energy(eV): -17.27 -17.26 -17.10 -17.03 -16.98 -16.95 -16.87 -16.87 -16.70 -16.68  
Symmetry: A A A A A A A A A A

FRAG# 1: 1.37 0.99 2.74 0.18 0.85 0.38 0.99 0.71 1.35 4.13  
Net pop.(%) 0.83 0.61 1.67 0.12 0.66 0.33 0.77 0.52 1.01 3.31

FRAG# 2: 0.79 0.31 1.80 0.32 0.22 0.20 0.20 0.01 0.17 0.58  
Net pop.(%) 0.46 0.21 1.18 0.17 0.33 0.15 0.13 0.03 0.12 0.48

FRAG# 3: 97.83 98.71 95.47 99.49 98.92 99.42 98.81 99.28 98.48 95.29  
Net pop.(%) 97.17 98.23 94.47 99.30 98.81 99.38 98.61 99.11 98.10 94.68

OP( 1 & 2 ) 0.002 0.000 0.007 0.000 0.000 0.001 0.001 0.000 0.000 0.003  
OP( 1 & 3 ) 0.009 0.008 0.015 0.001 0.004 0.000 0.004 0.004 0.007 0.013  
OP( 2 & 3 ) 0.004 0.002 0.005 0.003 -0.002 0.000 0.000 0.000 0.001 -0.001

Alpha MO: 121 122 123 124 125 126 127 128 129 130  
HOMO-65 HOMO-64 HOMO-63 HOMO-62 HOMO-61 HOMO-60 HOMO-59 HOMO-58 HOMO-57 HOMO-56  
Energy(eV): -16.60 -16.58 -16.46 -16.44 -16.29 -16.27 -16.15 -15.95 -15.86 -15.79  
Symmetry: A A A A A A A A A A

FRAG# 1: 0.89 1.22 2.03 0.35 2.83 0.90 9.42 5.59 38.52 2.32  
Net pop.(%) 0.63 0.97 1.52 0.21 2.27 0.60 7.08 4.48 33.96 2.02

FRAG# 2: 0.38 0.07 1.24 0.28 0.34 0.67 7.65 1.35 15.29 0.35  
Net pop.(%) 0.33 0.11 0.85 0.17 0.26 0.38 5.68 1.13 12.84 0.36

FRAG# 3: 98.72 98.71 96.73 99.36 96.83 98.43 82.94 93.06 46.19 97.32  
Net pop.(%) 98.41 98.43 96.35 99.16 96.28 97.85 81.93 92.27 45.20 97.01

OP( 1 & 2 ) 0.000 -0.001 0.005 0.001 0.001 0.000 0.033 0.005 0.060 0.000  
OP( 1 & 3 ) 0.005 0.006 0.005 0.002 0.010 0.006 0.014 0.017 0.031 0.006  
OP( 2 & 3 ) 0.001 0.000 0.003 0.002 0.001 0.006 0.006 -0.001 -0.011 0.000

Alpha MO: 131 132 133 134 135 136 137 138 139 140  
HOMO-55 HOMO-54 HOMO-53 HOMO-52 HOMO-51 HOMO-50 HOMO-49 HOMO-48 HOMO-47 HOMO-46  
Energy(eV): -15.76 -15.72 -15.68 -15.61 -15.59 -15.56 -15.51 -15.49 -15.41 -15.35  
Symmetry: A A A A A A A A A A

FRAG# 1: 38.84 2.21 9.08 9.88 12.05 3.04 7.46 1.73 0.37 2.90  
Net pop.(%) 35.67 1.70 7.65 9.24 10.06 2.45 6.48 1.59 0.28 2.50

FRAG# 2: 28.32 0.27 1.09 4.68 8.32 3.30 7.47 0.96 0.01 1.76  
Net pop.(%) 24.58 0.19 0.94 4.14 6.62 2.53 6.16 0.98 0.00 1.40

FRAG# 3: 32.84 97.52 89.82 85.44 79.64 93.66 85.07 97.31 99.62 95.34  
Net pop.(%) 33.37 97.04 88.52 85.84 79.57 93.40 85.00 97.24 99.52 95.35

OP( 1 & 2 ) 0.075 0.001 0.003 0.016 0.036 0.011 0.022 0.000 0.000 0.008  
OP( 1 & 3 ) -0.011 0.009 0.026 -0.003 0.004 0.001 -0.003 0.002 0.002 0.000  
OP( 2 & 3 ) 0.000 0.001 0.000 -0.005 -0.002 0.004 0.004 -0.001 0.000 0.000

Alpha MO: 141 142 143 144 145 146 147 148 149 150  
HOMO-45 HOMO-44 HOMO-43 HOMO-42 HOMO-41 HOMO-40 HOMO-39 HOMO-38 HOMO-37 HOMO-36  
Energy(eV): -15.33 -15.26 -15.25 -15.23 -15.15 -15.09 -15.06 -14.98 -14.92 -14.90  
Symmetry: A A A A A A A A A A

FRAG# 1: 2.02 1.15 0.89 11.24 2.02 0.10 2.71 5.73 2.22 7.17  
Net pop.(%) 1.69 0.81 0.62 10.17 1.45 0.08 2.52 5.18 1.75 6.30

FRAG# 2: 0.31 1.38 0.67 2.50 0.04 0.00 2.96 1.13 6.13 2.48  
Net pop.(%) 0.45 1.13 0.46 2.40 0.13 0.00 2.68 0.91 5.05 2.09

FRAG# 3: 97.67 97.47 98.45 86.26 97.94 99.90 94.34 93.14 91.65 90.34  
Net pop.(%) 97.34 97.38 98.16 85.14 97.31 99.89 94.48 92.91 91.34 89.98

OP( 1 & 2 ) -0.001 0.005 0.002 0.000 -0.001 0.000 0.006 0.005 0.012 0.009  
OP( 1 & 3 ) 0.008 0.002 0.003 0.021 0.013 0.000 -0.002 0.005 -0.003 0.008  
OP( 2 & 3 ) -0.002 0.000 0.002 0.002 0.000 0.000 0.000 -0.001 0.009 -0.001

Alpha MO: 151 152 153 154 155 156 157 158 159 160  
HOMO-35 HOMO-34 HOMO-33 HOMO-32 HOMO-31 HOMO-30 HOMO-29 HOMO-28 HOMO-27 HOMO-26  
Energy(eV): -14.90 -14.81 -14.81 -14.78 -14.76 -14.67 -14.61 -14.57 -14.38 -14.31  
Symmetry: A A A A A A A A A A

FRAG# 1: 4.39 6.42 25.43 0.84 2.26 0.88 3.02 42.53 18.56 22.33  
Net pop.(%) 3.91 5.67 23.51 0.72 1.40 0.82 2.76 40.09 16.91 20.69

FRAG# 2: 0.03 0.31 7.42 0.01 8.73 0.12 1.57 10.71 1.72 7.99  
Net pop.(%) 0.17 0.73 5.92 0.01 7.11 0.13 1.24 8.78 2.40 6.80

FRAG# 3: 95.59 93.27 67.15 99.15 89.01 99.00 95.41 46.77 79.72 69.69  
Net pop.(%) 95.03 92.29 66.93 99.02 88.10 98.95 95.11 46.79 77.90 69.46

OP( 1 & 2 ) -0.002 -0.006 0.032 0.000 0.016 0.000 0.003 0.044 -0.009 0.026  
OP( 1 & 3 ) 0.012 0.021 0.006 0.003 0.002 0.001 0.002 0.005 0.042 0.007  
OP( 2 & 3 ) -0.001 -0.002 -0.002 0.000 0.017 0.000 0.004 -0.005 -0.005 -0.002

Alpha MO: 161 162 163 164 165 166 167 168 169 170  
HOMO-25 HOMO-24 HOMO-23 HOMO-22 HOMO-21 HOMO-20 HOMO-19 HOMO-18 HOMO-17 HOMO-16  
Energy(eV): -14.21 -14.18 -13.92 -13.88 -13.73 -13.55 -13.46 -13.34 -13.25 -13.14  
Symmetry: A A A A A A A A A A

FRAG# 1: 6.27 68.64 55.71 27.33 73.60 80.09 6.26 21.21 48.43 16.04  
Net pop.(%) 5.86 65.91 56.60 26.78 73.15 80.29 5.89 21.29 50.16 16.89

FRAG# 2: 1.73 13.41 0.27 5.59 2.25 0.35 3.68 6.86 4.03 1.06  
Net pop.(%) 1.76 10.87 0.22 5.20 2.41 0.34 3.04 7.73 4.12 1.74

FRAG# 3: 91.99 17.95 44.03 67.08 24.14 19.56 90.06 71.93 47.54 82.90  
Net pop.(%) 92.09 18.30 45.25 66.99 24.23 19.87 89.53 74.38 48.21 84.16

OP( 1 & 2 ) 0.005 0.056 0.004 0.009 0.004 0.001 0.005 0.015 -0.011 -0.003  
OP( 1 & 3 ) 0.004 -0.002 -0.022 0.003 0.005 -0.005 0.003 -0.017 -0.023 -0.014  
OP( 2 & 3 ) -0.005 -0.005 -0.003 -0.001 -0.007 -0.001 0.008 -0.033 0.010 -0.011

Alpha MO: 171 172 173 174 175 176 177 178 179 180  
HOMO-15 HOMO-14 HOMO-13 HOMO-12 HOMO-11 HOMO-10 HOMO-9 HOMO-8 HOMO-7 HOMO-6  
Energy(eV): -12.86 -12.84 -12.61 -12.44 -12.32 -11.83 -11.76 -11.13 -11.10 -11.05  
Symmetry: A A A A A A A A A A

=====

|             |       |       |      |       |       |      |       |      |      |      |
|-------------|-------|-------|------|-------|-------|------|-------|------|------|------|
| FRAG# 1:    | 28.86 | 41.26 | 4.07 | 51.36 | 43.13 | 7.27 | 25.83 | 2.61 | 4.33 | 0.31 |
| Net pop.(%) | 27.68 | 40.53 | 2.57 | 50.68 | 44.17 | 6.57 | 25.51 | 3.43 | 4.30 | 0.39 |

-----

|             |      |       |       |       |       |       |       |       |      |      |
|-------------|------|-------|-------|-------|-------|-------|-------|-------|------|------|
| FRAG# 2:    | 4.95 | -0.08 | 13.35 | 39.49 | 42.61 | 39.30 | 45.85 | 22.18 | 0.29 | 1.25 |
| Net pop.(%) | 5.69 | 0.31  | 12.81 | 38.69 | 44.04 | 37.46 | 46.67 | 22.99 | 0.63 | 1.49 |

-----

|             |       |       |       |       |       |       |       |       |       |       |
|-------------|-------|-------|-------|-------|-------|-------|-------|-------|-------|-------|
| FRAG# 3:    | 66.19 | 58.81 | 82.58 | 9.15  | 14.26 | 53.43 | 28.33 | 75.21 | 95.38 | 98.44 |
| Net pop.(%) | 64.79 | 58.01 | 82.54 | 14.31 | 14.32 | 52.91 | 29.85 | 75.49 | 95.12 | 99.04 |

-----

|           |        |        |        |        |        |        |        |        |        |        |
|-----------|--------|--------|--------|--------|--------|--------|--------|--------|--------|--------|
| OP(1 & 2) | -0.010 | -0.005 | 0.020  | 0.066  | -0.024 | 0.020  | 0.010  | -0.013 | -0.006 | 0.003  |
| OP(1 & 3) | 0.033  | 0.019  | 0.010  | -0.053 | 0.003  | -0.006 | -0.004 | -0.003 | 0.006  | -0.004 |
| OP(2 & 3) | -0.005 | -0.003 | -0.009 | -0.050 | -0.005 | 0.017  | -0.027 | -0.003 | -0.001 | -0.008 |

Alpha MO: 181 182 183 184 185 186 187 188 189 190  
HOMO-5 HOMO-4 HOMO-3 HOMO-2 HOMO-1 HOMO LUMO LUMO+1 LUMO+2 LUMO+3  
Energy(eV): -10.97 -10.96 -10.92 -10.89 -10.85 -10.74 -8.38 -7.94 -5.19 -5.19  
Symmetry: A A A A A A A A A A

=====

|             |      |      |      |      |       |       |       |       |      |       |
|-------------|------|------|------|------|-------|-------|-------|-------|------|-------|
| FRAG# 1:    | 4.73 | 2.74 | 2.28 | 2.13 | 16.58 | 12.70 | 37.12 | 38.86 | 7.42 | 10.29 |
| Net pop.(%) | 5.71 | 3.11 | 2.68 | 2.52 | 21.55 | 14.71 | 49.45 | 50.79 | 9.94 | 12.37 |

-----

|             |      |      |       |      |       |       |       |       |      |      |
|-------------|------|------|-------|------|-------|-------|-------|-------|------|------|
| FRAG# 2:    | 2.95 | 2.55 | 25.24 | 1.08 | 33.16 | 15.77 | 43.31 | 33.56 | 0.26 | 1.64 |
| Net pop.(%) | 3.55 | 2.91 | 26.49 | 1.14 | 34.53 | 17.72 | 53.00 | 42.84 | 0.51 | 4.27 |

-----

|             |       |       |       |       |       |       |       |       |       |       |
|-------------|-------|-------|-------|-------|-------|-------|-------|-------|-------|-------|
| FRAG# 3:    | 92.32 | 94.70 | 72.48 | 96.79 | 50.26 | 71.53 | 19.57 | 27.58 | 92.32 | 88.07 |
| Net pop.(%) | 93.38 | 95.21 | 72.82 | 97.36 | 51.82 | 73.85 | 23.44 | 40.27 | 95.14 | 87.95 |

-----

|           |        |        |        |        |        |        |        |        |        |        |
|-----------|--------|--------|--------|--------|--------|--------|--------|--------|--------|--------|
| OP(1 & 2) | -0.005 | -0.002 | -0.013 | 0.001  | -0.048 | -0.016 | -0.181 | -0.085 | 0.000  | -0.048 |
| OP(1 & 3) | -0.014 | -0.005 | 0.005  | -0.009 | -0.051 | -0.024 | -0.065 | -0.153 | -0.051 | 0.007  |
| OP(2 & 3) | -0.007 | -0.005 | -0.012 | -0.002 | 0.020  | -0.023 | -0.012 | -0.100 | -0.005 | -0.004 |





Alpha MO: 41 42 43 44 45 46 47 48 49 50  
Energy(eV): -280.71 -280.71 -280.71 -280.71 -280.68 -280.68 -280.68 -280.68 -279.76 -279.76  
Symmetry: A A A A A A A A A A

FRAG# 1: 0.00 0.00 0.00 0.00 0.01 0.00 0.01 0.00 0.01 0.01  
FRAG# 2: 0.00 0.00 0.00 0.00 0.00 0.00 0.00 0.00 0.00 0.00

FRAG# 3: 100.00 100.00 100.00 100.00 99.99 100.00 99.99 100.00 99.99 99.99  
Net pop.(%) 100.00 100.00 100.00 100.00 99.97 100.00 99.97 100.00 99.98 99.98

OP( 1 & 2 ) 0.000 0.000 0.000 0.000 0.000 0.000 0.000 0.000 0.000 0.000  
OP( 1 & 3 ) 0.000 0.000 0.000 0.000 0.000 0.000 0.000 0.000 0.000 0.000  
OP( 2 & 3 ) 0.000 0.000 0.000 0.000 0.000 0.000 0.000 0.000 0.000 0.000

Alpha MO: 51 52 53 54 55 56 57 58 59 60  
Energy(eV): -122.31 -121.67 -81.51 -81.45 -80.63 -80.63 -80.57 -80.43 -33.40 -31.63  
Symmetry: A A A A A A A A A A

FRAG# 1: 100.29 100.29 99.99 99.98 99.99 99.98 99.96 100.00 0.89 -0.19  
Net pop.(%) 100.60 100.58 99.99 99.97 99.99 99.97 99.93 100.00 0.95 0.03

FRAG# 2: -0.04 -0.04 0.03 0.04 0.00 0.03 0.05 0.00 99.17 0.06  
Net pop.(%) 0.00 0.00 0.00 0.00 0.00 0.00 0.00 0.00 99.28 0.08

FRAG# 3: -0.26 -0.25 -0.02 -0.02 0.00 -0.01 -0.01 0.00 -0.06 100.13  
Net pop.(%) 0.01 0.01 0.01 0.00 0.01 0.01 0.01 0.01 0.14 100.38

OP( 1 & 2 ) -0.001 -0.001 0.000 0.001 0.000 0.001 0.001 0.000 0.000 0.000  
OP( 1 & 3 ) -0.005 -0.005 -0.001 -0.001 0.000 0.000 0.000 0.000 -0.001 -0.004  
OP( 2 & 3 ) 0.000 0.000 0.000 0.000 0.000 0.000 0.000 0.000 -0.003 0.000

Alpha MO: 61 62 63 64 65 66 67 68 69 70  
Energy(eV): -31.62 -31.61 -31.60 -29.46 -29.45 -29.45 -29.45 -28.68 -28.64 -28.39  
Symmetry: A A A A A A A A A A

FRAG# 1: -0.16 -0.21 -0.23 0.12 0.09 0.09 0.08 0.21 0.23 0.04  
Net pop.(%) 0.03 0.02 0.02 0.01 0.01 0.01 0.01 0.15 0.15 0.16

FRAG# 2: 0.05 0.01 0.00 0.00 0.00 0.02 0.01 0.01 0.01 0.01  
Net pop.(%) 0.07 0.01 0.00 0.00 0.01 0.02 0.01 0.03 0.03 0.00

FRAG# 3: 100.12 100.20 100.22 99.88 99.91 99.89 99.90 99.78 99.76 99.95  
Net pop.(%) 100.33 100.43 100.47 99.76 99.84 99.82 99.84 99.73 99.69 100.05

OP( 1 & 2 ) 0.000 0.000 0.000 0.000 0.000 0.000 0.000 0.000 0.000 0.000  
OP( 1 & 3 ) -0.004 -0.005 -0.005 0.002 0.002 0.001 0.001 0.001 0.002 -0.002  
OP( 2 & 3 ) 0.000 0.000 0.000 0.000 0.000 0.000 0.000 0.000 0.000 0.000

Alpha MO: 71 72 73 74 75 76 77 78 79 80  
Energy(eV): -28.35 -26.53 -25.49 -25.48 -24.36 -24.35 -24.27 -24.26 -24.13 -24.09  
Symmetry: A A A A A A A A A A

FRAG# 1: 0.04 2.63 -0.01 -0.18 0.10 0.15 0.13 -0.01 0.12 0.12  
Net pop.(%) 0.14 0.82 0.05 0.05 0.02 0.02 0.01 0.01 0.03 0.03

FRAG# 2: 0.01 97.10 0.00 0.01 0.00 0.00 0.01 0.03 0.04 -0.01  
Net pop.(%) 0.00 95.16 0.00 0.00 0.00 0.00 0.01 0.01 0.06 0.00

FRAG# 3: 99.94 0.28 100.01 100.18 99.90 99.85 99.87 99.98 99.84 99.88  
Net pop.(%) 100.02 0.22 100.06 100.40 99.82 99.72 99.76 99.98 99.76 99.80

OP( 1 & 2 ) 0.000 0.037 0.000 0.000 0.000 0.000 0.000 0.000 0.000 0.000  
OP( 1 & 3 ) -0.002 -0.001 -0.001 -0.005 0.002 0.003 0.002 0.000 0.002 0.002  
OP( 2 & 3 ) 0.000 0.002 0.000 0.000 0.000 0.000 0.000 0.000 0.000 0.000

Alpha MO: 81 82 83 84 85 86 87 88 89 90  
Energy(eV): -23.94 -23.89 -23.83 -23.82 -23.51 -23.50 -22.35 -22.33 -22.27 -22.26  
Symmetry: A A A A A A A A A A

=====

|             |       |       |      |      |      |       |      |      |      |      |
|-------------|-------|-------|------|------|------|-------|------|------|------|------|
| FRAG# 1:    | -0.01 | -0.01 | 0.04 | 0.07 | 0.04 | -0.01 | 0.24 | 0.19 | 0.01 | 0.07 |
| Net pop.(%) | 0.00  | 0.00  | 0.02 | 0.02 | 0.09 | 0.09  | 0.13 | 0.10 | 0.04 | 0.03 |

-----

|             |      |      |      |      |      |      |      |      |      |      |
|-------------|------|------|------|------|------|------|------|------|------|------|
| FRAG# 2:    | 0.00 | 0.01 | 0.00 | 0.00 | 0.01 | 0.03 | 0.00 | 0.01 | 0.01 | 0.00 |
| Net pop.(%) | 0.00 | 0.00 | 0.00 | 0.00 | 0.02 | 0.01 | 0.01 | 0.01 | 0.01 | 0.00 |

-----

|             |        |        |       |       |        |        |       |       |        |       |
|-------------|--------|--------|-------|-------|--------|--------|-------|-------|--------|-------|
| FRAG# 3:    | 100.01 | 100.01 | 99.96 | 99.93 | 99.95  | 99.98  | 99.76 | 99.81 | 99.98  | 99.93 |
| Net pop.(%) | 100.03 | 100.02 | 99.94 | 99.88 | 100.00 | 100.08 | 99.66 | 99.72 | 100.01 | 99.90 |

-----

|             |       |       |       |       |        |        |       |       |        |       |
|-------------|-------|-------|-------|-------|--------|--------|-------|-------|--------|-------|
| OP( 1 & 2 ) | 0.000 | 0.000 | 0.000 | 0.000 | 0.000  | 0.000  | 0.000 | 0.000 | 0.000  | 0.000 |
| OP( 1 & 3 ) | 0.000 | 0.000 | 0.000 | 0.001 | -0.001 | -0.002 | 0.002 | 0.002 | -0.001 | 0.001 |
| OP( 2 & 3 ) | 0.000 | 0.000 | 0.000 | 0.000 | 0.000  | 0.000  | 0.000 | 0.000 | 0.000  | 0.000 |

Alpha MO: 91 92 93 94 95 96 97 98 99 100  
Energy(eV): -22.11 -22.09 -20.47 -20.44 -19.37 -19.35 -19.29 -19.24 -18.84 -18.81  
Symmetry: A A A A A A A A A A

=====

|             |      |      |      |      |      |      |      |      |      |      |
|-------------|------|------|------|------|------|------|------|------|------|------|
| FRAG# 1:    | 0.01 | 0.02 | 0.61 | 0.28 | 0.88 | 1.33 | 0.24 | 0.30 | 2.87 | 2.08 |
| Net pop.(%) | 0.02 | 0.02 | 0.19 | 0.16 | 0.40 | 0.55 | 0.28 | 0.32 | 1.40 | 1.00 |

-----

|             |      |      |      |      |      |      |      |      |      |      |
|-------------|------|------|------|------|------|------|------|------|------|------|
| FRAG# 2:    | 0.01 | 0.00 | 0.05 | 0.06 | 0.11 | 0.40 | 0.01 | 0.01 | 1.89 | 0.90 |
| Net pop.(%) | 0.01 | 0.00 | 0.03 | 0.04 | 0.10 | 0.29 | 0.01 | 0.01 | 1.47 | 0.79 |

-----

|             |        |       |       |       |       |       |       |       |       |       |
|-------------|--------|-------|-------|-------|-------|-------|-------|-------|-------|-------|
| FRAG# 3:    | 99.98  | 99.98 | 99.34 | 99.66 | 99.01 | 98.27 | 99.75 | 99.69 | 95.24 | 97.02 |
| Net pop.(%) | 100.00 | 99.99 | 98.91 | 99.52 | 98.52 | 97.54 | 99.77 | 99.70 | 93.88 | 95.98 |

-----

|             |       |       |       |       |       |       |        |       |       |       |
|-------------|-------|-------|-------|-------|-------|-------|--------|-------|-------|-------|
| OP( 1 & 2 ) | 0.000 | 0.000 | 0.000 | 0.000 | 0.000 | 0.002 | 0.000  | 0.000 | 0.005 | 0.001 |
| OP( 1 & 3 ) | 0.000 | 0.000 | 0.008 | 0.002 | 0.010 | 0.014 | -0.001 | 0.000 | 0.024 | 0.020 |
| OP( 2 & 3 ) | 0.000 | 0.000 | 0.000 | 0.001 | 0.000 | 0.001 | 0.000  | 0.000 | 0.003 | 0.001 |

Alpha MO: 101 102 103 104 105 106 107 108 109 110  
Energy(eV): -18.61 -18.55 -18.36 -18.35 -18.13 -18.05 -17.97 -17.94 -17.70 -17.68  
Symmetry: A A A A A A A A A A

=====

|             |      |      |      |      |      |      |      |      |      |      |
|-------------|------|------|------|------|------|------|------|------|------|------|
| FRAG# 1:    | 0.59 | 0.43 | 0.84 | 0.78 | 3.55 | 1.89 | 2.23 | 1.60 | 0.00 | 0.24 |
| Net pop.(%) | 0.30 | 0.19 | 0.42 | 0.41 | 2.50 | 1.22 | 1.40 | 0.82 | 0.02 | 0.12 |

-----

|             |      |      |      |      |      |      |      |      |      |      |
|-------------|------|------|------|------|------|------|------|------|------|------|
| FRAG# 2:    | 0.00 | 0.01 | 0.24 | 0.16 | 0.11 | 0.03 | 8.05 | 2.00 | 0.08 | 0.24 |
| Net pop.(%) | 0.00 | 0.01 | 0.19 | 0.13 | 0.09 | 0.05 | 6.60 | 1.75 | 0.17 | 0.13 |

-----

|             |       |       |       |       |       |       |       |       |        |       |
|-------------|-------|-------|-------|-------|-------|-------|-------|-------|--------|-------|
| FRAG# 3:    | 99.40 | 99.56 | 98.92 | 99.05 | 96.34 | 98.08 | 89.71 | 96.40 | 99.92  | 99.52 |
| Net pop.(%) | 99.11 | 99.32 | 98.46 | 98.68 | 95.30 | 97.39 | 88.80 | 95.46 | 100.00 | 99.35 |

-----

|             |       |       |       |       |       |        |       |       |        |       |
|-------------|-------|-------|-------|-------|-------|--------|-------|-------|--------|-------|
| OP( 1 & 2 ) | 0.000 | 0.000 | 0.000 | 0.000 | 0.000 | -0.001 | 0.014 | 0.001 | 0.000  | 0.001 |
| OP( 1 & 3 ) | 0.006 | 0.005 | 0.008 | 0.007 | 0.021 | 0.014  | 0.003 | 0.015 | 0.000  | 0.002 |
| OP( 2 & 3 ) | 0.000 | 0.000 | 0.001 | 0.000 | 0.000 | 0.000  | 0.015 | 0.004 | -0.002 | 0.002 |

Alpha MO: 111 112 113 114 115 116 117 118 119 120  
HOMO-75 HOMO-74 HOMO-73 HOMO-72 HOMO-71 HOMO-70 HOMO-69 HOMO-68 HOMO-67 HOMO-66  
Energy(eV): -17.35 -17.14 -17.12 -16.92 -16.91 -16.90 -16.81 -16.78 -16.75 -16.61  
Symmetry: A A A A A A A A A A

FRAG# 1: 13.62 1.02 0.44 0.06 1.67 0.06 3.50 0.61 0.74 1.86  
Net pop.(%) 9.54 0.45 0.27 0.04 0.98 0.06 2.62 0.42 0.54 1.38

FRAG# 2: 49.67 2.09 1.07 0.18 4.06 0.03 14.54 0.03 0.10 0.06  
Net pop.(%) 45.02 1.60 0.98 0.09 3.84 0.06 13.92 0.04 0.09 0.05

FRAG# 3: 36.71 96.89 98.49 99.76 94.27 99.91 81.96 99.36 99.16 98.08  
Net pop.(%) 37.32 96.10 98.16 99.65 93.43 99.94 82.78 99.17 98.99 97.61

OP( 1 & 2 ) 0.093 0.003 -0.001 0.000 0.001 0.000 0.023 0.000 0.000 0.000  
OP( 1 & 3 ) -0.012 0.009 0.004 0.000 0.013 0.000 -0.006 0.004 0.004 0.009  
OP( 2 & 3 ) 0.000 0.007 0.002 0.002 0.004 -0.001 -0.011 0.000 0.000 0.000

Alpha MO: 121 122 123 124 125 126 127 128 129 130  
HOMO-65 HOMO-64 HOMO-63 HOMO-62 HOMO-61 HOMO-60 HOMO-59 HOMO-58 HOMO-57 HOMO-56  
Energy(eV): -16.57 -16.45 -16.44 -16.41 -16.39 -16.18 -16.11 -16.08 -15.84 -15.80  
Symmetry: A A A A A A A A A A

FRAG# 1: 1.66 0.49 0.49 0.49 0.44 8.68 1.68 0.59 3.68 0.66  
Net pop.(%) 1.15 0.29 0.38 0.34 0.25 6.78 1.33 0.38 2.53 0.32

FRAG# 2: 0.07 2.48 0.03 0.14 1.66 70.64 0.03 0.04 9.64 6.19  
Net pop.(%) 0.05 2.35 0.04 0.09 1.45 69.20 0.03 0.03 8.82 6.20

FRAG# 3: 98.27 97.03 99.48 99.37 97.90 20.68 98.29 99.36 86.67 93.15  
Net pop.(%) 97.78 96.77 99.37 99.22 97.58 21.57 97.96 99.14 86.06 92.90

OP( 1 & 2 ) 0.000 0.001 0.000 0.000 0.001 0.042 0.000 0.000 0.014 0.001  
OP( 1 & 3 ) 0.010 0.003 0.002 0.002 0.003 -0.004 0.007 0.004 0.009 0.006  
OP( 2 & 3 ) 0.000 0.002 0.000 0.001 0.003 -0.014 0.000 0.000 0.003 -0.001

Alpha MO: 131 132 133 134 135 136 137 138 139 140  
HOMO-55 HOMO-54 HOMO-53 HOMO-52 HOMO-51 HOMO-50 HOMO-49 HOMO-48 HOMO-47 HOMO-46  
Energy(eV): -15.73 -15.72 -15.67 -15.61 -15.59 -15.49 -15.35 -15.35 -15.29 -15.27  
Symmetry: A A A A A A A A A A

FRAG# 1: 9.32 4.85 2.76 0.48 10.51 3.54 0.76 0.51 1.53 6.70  
Net pop.(%) 6.69 4.30 2.29 0.24 9.08 2.60 0.66 0.29 1.17 5.92

FRAG# 2: 33.52 0.75 0.84 0.97 1.10 0.26 0.18 0.35 3.39 3.13  
Net pop.(%) 30.56 0.62 0.64 1.07 0.94 0.25 0.18 0.38 3.32 2.44

FRAG# 3: 57.15 94.40 96.40 98.55 88.39 96.19 99.06 99.14 95.08 90.18  
Net pop.(%) 55.95 93.97 96.08 98.41 87.26 95.36 98.97 98.92 95.05 89.73

OP( 1 & 2 ) 0.044 0.003 0.004 0.000 0.005 0.001 0.000 0.000 0.004 0.010  
OP( 1 & 3 ) 0.009 0.009 0.006 0.005 0.024 0.018 0.002 0.005 0.003 0.005  
OP( 2 & 3 ) 0.015 0.000 0.001 -0.002 -0.001 -0.001 0.000 0.000 -0.003 0.004

Alpha MO: 141 142 143 144 145 146 147 148 149 150  
HOMO-45 HOMO-44 HOMO-43 HOMO-42 HOMO-41 HOMO-40 HOMO-39 HOMO-38 HOMO-37 HOMO-36  
Energy(eV): -15.25 -15.24 -15.23 -15.19 -15.04 -15.03 -14.97 -14.93 -14.86 -14.81  
Symmetry: A A A A A A A A A A

=====

|             |      |      |      |      |      |      |      |      |      |      |
|-------------|------|------|------|------|------|------|------|------|------|------|
| FRAG# 1:    | 1.94 | 9.20 | 1.15 | 7.54 | 1.30 | 2.15 | 3.20 | 2.40 | 4.66 | 0.23 |
| Net pop.(%) | 1.59 | 8.35 | 0.84 | 6.09 | 0.81 | 1.79 | 2.95 | 1.71 | 3.58 | 0.10 |

-----

|             |      |      |      |       |      |      |      |      |      |      |
|-------------|------|------|------|-------|------|------|------|------|------|------|
| FRAG# 2:    | 6.11 | 2.43 | 0.95 | 20.43 | 0.41 | 0.07 | 0.78 | 0.51 | 0.47 | 0.49 |
| Net pop.(%) | 6.11 | 2.05 | 1.01 | 20.14 | 0.44 | 0.09 | 0.69 | 0.59 | 0.43 | 0.49 |

-----

|             |       |       |       |       |       |       |       |       |       |       |
|-------------|-------|-------|-------|-------|-------|-------|-------|-------|-------|-------|
| FRAG# 3:    | 91.95 | 88.37 | 97.90 | 72.03 | 98.29 | 97.77 | 96.01 | 97.08 | 94.86 | 99.27 |
| Net pop.(%) | 92.06 | 88.02 | 97.67 | 73.02 | 97.79 | 97.37 | 95.93 | 96.47 | 93.89 | 99.20 |

-----

|             |        |        |        |        |        |       |        |        |        |        |
|-------------|--------|--------|--------|--------|--------|-------|--------|--------|--------|--------|
| OP( 1 & 2 ) | 0.005  | 0.009  | 0.000  | 0.027  | -0.001 | 0.000 | 0.003  | 0.000  | 0.002  | 0.001  |
| OP( 1 & 3 ) | 0.002  | 0.008  | 0.006  | 0.002  | 0.010  | 0.008 | 0.002  | 0.014  | 0.020  | 0.002  |
| OP( 2 & 3 ) | -0.005 | -0.001 | -0.001 | -0.022 | 0.000  | 0.000 | -0.001 | -0.002 | -0.001 | -0.001 |

Alpha MO: 151 152 153 154 155 156 157 158 159 160  
HOMO-35 HOMO-34 HOMO-33 HOMO-32 HOMO-31 HOMO-30 HOMO-29 HOMO-28 HOMO-27 HOMO-26  
Energy(eV): -14.79 -14.78 -14.72 -14.66 -14.63 -14.61 -14.59 -14.30 -14.26 -14.19  
Symmetry: A A A A A A A A A A

=====

|             |      |      |      |      |      |      |      |       |      |      |
|-------------|------|------|------|------|------|------|------|-------|------|------|
| FRAG# 1:    | 0.63 | 0.56 | 2.44 | 1.44 | 6.67 | 2.97 | 6.37 | 15.76 | 9.98 | 5.89 |
| Net pop.(%) | 0.52 | 0.42 | 2.26 | 1.28 | 5.60 | 2.37 | 5.46 | 14.59 | 8.86 | 5.15 |

-----

|             |      |      |      |      |      |      |      |       |      |      |
|-------------|------|------|------|------|------|------|------|-------|------|------|
| FRAG# 2:    | 0.01 | 0.00 | 1.31 | 0.69 | 1.03 | 0.41 | 1.02 | 21.03 | 0.60 | 1.96 |
| Net pop.(%) | 0.01 | 0.00 | 1.10 | 0.59 | 1.27 | 0.37 | 1.29 | 17.64 | 0.67 | 2.29 |

-----

|             |       |       |       |       |       |       |       |       |       |       |
|-------------|-------|-------|-------|-------|-------|-------|-------|-------|-------|-------|
| FRAG# 3:    | 99.37 | 99.44 | 96.25 | 97.86 | 92.30 | 96.63 | 92.60 | 63.22 | 89.43 | 92.15 |
| Net pop.(%) | 99.26 | 99.30 | 96.30 | 97.78 | 91.12 | 96.11 | 91.64 | 63.78 | 88.43 | 91.26 |

-----

|             |       |       |        |       |        |       |        |        |        |        |
|-------------|-------|-------|--------|-------|--------|-------|--------|--------|--------|--------|
| OP( 1 & 2 ) | 0.000 | 0.000 | 0.004  | 0.002 | -0.004 | 0.001 | -0.003 | 0.051  | 0.000  | -0.005 |
| OP( 1 & 3 ) | 0.002 | 0.003 | -0.001 | 0.001 | 0.025  | 0.011 | 0.021  | -0.028 | 0.022  | 0.020  |
| OP( 2 & 3 ) | 0.000 | 0.000 | 0.000  | 0.000 | -0.001 | 0.000 | -0.002 | 0.017  | -0.002 | -0.002 |

Alpha MO: 161 162 163 164 165 166 167 168 169 170  
HOMO-25 HOMO-24 HOMO-23 HOMO-22 HOMO-21 HOMO-20 HOMO-19 HOMO-18 HOMO-17 HOMO-16  
Energy(eV): -14.07 -13.98 -13.48 -13.41 -13.19 -13.06 -12.96 -12.95 -12.82 -12.70  
Symmetry: A A A A A A A A A A

=====

|             |       |       |       |       |       |       |       |       |       |       |
|-------------|-------|-------|-------|-------|-------|-------|-------|-------|-------|-------|
| FRAG# 1:    | 11.15 | 11.26 | 23.60 | 12.80 | 41.19 | 40.83 | 20.03 | 53.51 | 56.58 | 69.32 |
| Net pop.(%) | 9.47  | 9.59  | 22.27 | 11.78 | 39.62 | 39.98 | 19.61 | 53.02 | 57.20 | 69.17 |

-----

|             |      |      |      |      |      |      |      |      |      |      |
|-------------|------|------|------|------|------|------|------|------|------|------|
| FRAG# 2:    | 0.37 | 1.07 | 2.61 | 0.93 | 5.89 | 0.73 | 0.13 | 4.55 | 1.26 | 3.09 |
| Net pop.(%) | 0.55 | 1.41 | 2.11 | 0.82 | 5.82 | 0.84 | 0.15 | 3.92 | 1.41 | 2.77 |

-----

|             |       |       |       |       |       |       |       |       |       |       |
|-------------|-------|-------|-------|-------|-------|-------|-------|-------|-------|-------|
| FRAG# 3:    | 88.48 | 87.68 | 73.79 | 86.27 | 52.92 | 58.44 | 79.84 | 41.94 | 42.17 | 27.59 |
| Net pop.(%) | 86.69 | 85.91 | 72.58 | 85.39 | 51.46 | 57.50 | 79.33 | 42.24 | 42.51 | 27.74 |

-----

|             |        |        |       |       |       |        |        |        |        |        |
|-------------|--------|--------|-------|-------|-------|--------|--------|--------|--------|--------|
| OP( 1 & 2 ) | -0.003 | -0.004 | 0.006 | 0.002 | 0.002 | -0.002 | -0.001 | 0.014  | -0.004 | 0.006  |
| OP( 1 & 3 ) | 0.036  | 0.038  | 0.020 | 0.018 | 0.030 | 0.019  | 0.010  | -0.004 | -0.008 | -0.003 |
| OP( 2 & 3 ) | -0.001 | -0.002 | 0.004 | 0.000 | 0.000 | 0.000  | 0.001  | -0.002 | 0.001  | 0.000  |

Alpha MO: 171 172 173 174 175 176 177 178 179 180  
HOMO-15 HOMO-14 HOMO-13 HOMO-12 HOMO-11 HOMO-10 HOMO-9 HOMO-8 HOMO-7 HOMO-6  
Energy(eV): -12.66 -12.59 -12.38 -12.36 -12.14 -12.03 -10.99 -10.98 -10.96 -10.94  
Symmetry: A A A A A A A A A A

=====

|             |       |       |      |       |       |       |      |      |      |      |
|-------------|-------|-------|------|-------|-------|-------|------|------|------|------|
| FRAG# 1:    | 85.63 | 64.34 | 5.75 | 76.52 | 73.62 | 82.84 | 4.42 | 0.82 | 0.56 | 1.06 |
| Net pop.(%) | 89.20 | 65.08 | 4.21 | 76.65 | 77.21 | 83.16 | 5.02 | 1.02 | 0.50 | 1.15 |

-----

|             |      |      |       |      |       |      |      |      |      |       |
|-------------|------|------|-------|------|-------|------|------|------|------|-------|
| FRAG# 2:    | 6.59 | 8.49 | 18.53 | 0.72 | 14.16 | 0.78 | 1.10 | 0.06 | 0.16 | 22.66 |
| Net pop.(%) | 9.42 | 9.88 | 17.51 | 0.71 | 17.66 | 0.77 | 1.27 | 0.10 | 0.25 | 22.56 |

-----

|             |      |       |       |       |       |       |       |       |       |       |
|-------------|------|-------|-------|-------|-------|-------|-------|-------|-------|-------|
| FRAG# 3:    | 7.79 | 27.17 | 75.72 | 22.75 | 12.22 | 16.38 | 94.48 | 99.11 | 99.28 | 76.27 |
| Net pop.(%) | 8.52 | 27.62 | 74.52 | 22.86 | 13.17 | 16.64 | 94.84 | 99.27 | 99.27 | 75.88 |

-----

|           |        |        |       |        |        |        |        |        |        |        |
|-----------|--------|--------|-------|--------|--------|--------|--------|--------|--------|--------|
| OP(1 & 2) | -0.057 | -0.017 | 0.014 | 0.000  | -0.061 | -0.001 | -0.004 | -0.001 | 0.000  | -0.004 |
| OP(1 & 3) | -0.015 | 0.002  | 0.017 | -0.002 | -0.010 | -0.006 | -0.008 | -0.003 | 0.002  | 0.002  |
| OP(2 & 3) | 0.000  | -0.011 | 0.007 | 0.000  | -0.009 | 0.001  | 0.001  | 0.000  | -0.001 | 0.006  |

Alpha MO: 181 182 183 184 185 186 187 188 189 190  
HOMO-5 HOMO-4 HOMO-3 HOMO-2 HOMO-1 HOMO LUMO LUMO+1 LUMO+2 LUMO+3  
Energy(eV): -10.92 -10.85 -10.73 -10.72 -10.61 -10.44 -7.77 -5.31 -5.14 -5.08  
Symmetry: A A A A A A A A A A

=====

|             |      |      |      |       |       |       |       |       |       |       |
|-------------|------|------|------|-------|-------|-------|-------|-------|-------|-------|
| FRAG# 1:    | 0.70 | 9.45 | 7.64 | 12.70 | 14.64 | 38.95 | 50.52 | 11.45 | 14.07 | 17.20 |
| Net pop.(%) | 0.78 | 9.92 | 9.00 | 14.32 | 18.04 | 44.89 | 63.02 | 8.78  | 18.57 | 20.00 |

-----

|             |       |      |      |      |       |       |       |       |      |      |
|-------------|-------|------|------|------|-------|-------|-------|-------|------|------|
| FRAG# 2:    | 39.78 | 0.17 | 2.56 | 2.01 | 24.59 | 7.83  | 28.77 | 70.22 | 0.06 | 0.59 |
| Net pop.(%) | 40.08 | 0.64 | 2.74 | 2.97 | 25.43 | 10.75 | 37.88 | 66.05 | 0.64 | 3.12 |

-----

|             |       |       |       |       |       |       |       |       |       |       |
|-------------|-------|-------|-------|-------|-------|-------|-------|-------|-------|-------|
| FRAG# 3:    | 59.52 | 90.38 | 89.81 | 85.29 | 60.78 | 53.21 | 20.71 | 18.33 | 85.88 | 82.21 |
| Net pop.(%) | 59.73 | 90.69 | 91.02 | 86.36 | 62.88 | 57.06 | 27.60 | 16.94 | 89.54 | 82.79 |

-----

|           |        |        |        |        |        |        |        |        |        |        |
|-----------|--------|--------|--------|--------|--------|--------|--------|--------|--------|--------|
| OP(1 & 2) | -0.002 | -0.006 | -0.003 | -0.015 | -0.021 | -0.050 | -0.147 | 0.054  | -0.014 | -0.047 |
| OP(1 & 3) | 0.000  | -0.003 | -0.024 | -0.017 | -0.047 | -0.069 | -0.103 | -0.001 | -0.076 | -0.009 |
| OP(2 & 3) | -0.004 | -0.003 | 0.000  | -0.004 | 0.005  | -0.008 | -0.035 | 0.029  | 0.003  | -0.003 |



Alpha MO: 41 42 43 44 45 46 47 48 49 50  
Energy(eV): -280.80 -280.80 -280.80 -280.80 -280.77 -280.77 -280.77 -280.77 -279.85 -279.85  
Symmetry: A A A A A A A A A A

FRAG# 1: 0.00 0.00 0.00 0.00 0.01 0.00 0.01 0.00 0.01 0.01  
FRAG# 2: 0.00 0.00 0.00 0.00 0.00 0.00 0.00 0.00 0.00 0.00

FRAG# 3: 100.00 100.00 100.00 100.00 99.99 100.00 99.99 100.00 99.99 99.99  
Net pop.(%) 100.00 100.00 100.00 100.00 99.97 100.00 99.97 100.00 99.98 99.98

OP( 1 & 2 ) 0.000 0.000 0.000 0.000 0.000 0.000 0.000 0.000 0.000 0.000  
OP( 1 & 3 ) 0.000 0.000 0.000 0.000 0.000 0.000 0.000 0.000 0.000 0.000  
OP( 2 & 3 ) 0.000 0.000 0.000 0.000 0.000 0.000 0.000 0.000 0.000 0.000

Alpha MO: 51 52 53 54 55 56 57 58 59 60  
Energy(eV): -126.10 -125.42 -82.62 -82.56 -81.72 -81.70 -81.63 -81.50 -33.43 -31.65  
Symmetry: A A A A A A A A A A

FRAG# 1: 100.23 100.22 99.99 99.98 99.99 99.98 99.96 99.99 0.94 -0.18  
Net pop.(%) 100.46 100.45 100.00 99.97 99.99 99.97 99.92 100.00 0.94 0.03

FRAG# 2: -0.02 -0.02 0.02 0.04 0.00 0.03 0.05 0.00 99.14 0.06  
Net pop.(%) 0.00 0.00 0.00 0.00 0.00 0.00 0.00 0.00 99.22 0.08

FRAG# 3: -0.20 -0.19 -0.02 -0.02 0.00 -0.01 0.00 0.00 -0.08 100.12  
Net pop.(%) 0.01 0.01 0.01 0.01 0.01 0.01 0.01 0.01 0.14 100.34

OP( 1 & 2 ) -0.001 0.000 0.000 0.001 0.000 0.000 0.001 0.000 0.001 0.000  
OP( 1 & 3 ) -0.004 -0.004 -0.001 0.000 0.000 0.000 0.000 0.000 -0.001 -0.004  
OP( 2 & 3 ) 0.000 0.000 0.000 0.000 0.000 0.000 0.000 0.000 -0.003 0.000

Alpha MO: 61 62 63 64 65 66 67 68 69 70  
Energy(eV): -31.64 -31.63 -31.62 -29.47 -29.47 -29.47 -29.46 -28.71 -28.67 -28.42  
Symmetry: A A A A A A A A A A

FRAG# 1: -0.15 -0.22 -0.23 0.12 0.09 0.09 0.08 0.24 0.26 0.03  
Net pop.(%) 0.03 0.02 0.02 0.01 0.01 0.01 0.01 0.15 0.15 0.16

FRAG# 2: 0.05 0.01 0.00 0.00 0.00 0.02 0.01 0.01 0.01 0.01  
Net pop.(%) 0.07 0.01 0.00 0.00 0.01 0.02 0.01 0.03 0.03 0.00

FRAG# 3: 100.10 100.21 100.23 99.88 99.91 99.89 99.90 99.75 99.73 99.96  
Net pop.(%) 100.30 100.44 100.47 99.76 99.83 99.82 99.83 99.66 99.63 100.07

OP( 1 & 2 ) 0.000 0.000 0.000 0.000 0.000 0.000 0.000 0.000 0.000 0.000  
OP( 1 & 3 ) -0.004 -0.005 -0.005 0.002 0.002 0.001 0.001 0.002 0.002 -0.002  
OP( 2 & 3 ) 0.000 0.000 0.000 0.000 0.000 0.000 0.000 0.000 0.000 0.000

Alpha MO: 71 72 73 74 75 76 77 78 79 80  
Energy(eV): -28.37 -26.56 -25.50 -25.49 -24.37 -24.36 -24.27 -24.26 -24.14 -24.10  
Symmetry: A A A A A A A A A A

FRAG# 1: 0.03 2.61 -0.01 -0.18 0.10 0.15 0.13 0.00 0.12 0.12  
Net pop.(%) 0.14 0.81 0.05 0.05 0.02 0.02 0.01 0.01 0.03 0.03

FRAG# 2: 0.01 97.12 0.00 0.01 0.00 0.00 0.01 0.03 0.04 -0.01  
Net pop.(%) 0.01 95.20 0.00 0.00 0.00 0.00 0.01 0.01 0.05 0.00

FRAG# 3: 99.95 0.27 100.01 100.17 99.90 99.85 99.86 99.97 99.84 99.89  
Net pop.(%) 100.04 0.22 100.07 100.40 99.82 99.71 99.74 99.96 99.75 99.80

OP( 1 & 2 ) 0.000 0.037 0.000 0.000 0.000 0.000 0.000 0.000 0.000 0.000  
OP( 1 & 3 ) -0.002 -0.001 -0.001 -0.005 0.002 0.003 0.002 0.000 0.002 0.002  
OP( 2 & 3 ) 0.000 0.002 0.000 0.000 0.000 0.000 0.000 0.000 0.000 0.000



Alpha MO: 81 82 83 84 85 86 87 88 89 90  
Energy(eV): -23.95 -23.90 -23.84 -23.83 -23.53 -23.51 -22.36 -22.34 -22.27 -22.27  
Symmetry: A A A A A A A A A A

=====

|             |       |       |      |      |      |      |      |      |      |      |
|-------------|-------|-------|------|------|------|------|------|------|------|------|
| FRAG# 1:    | -0.01 | -0.01 | 0.04 | 0.07 | 0.05 | 0.01 | 0.24 | 0.18 | 0.01 | 0.06 |
| Net pop.(%) | 0.00  | 0.00  | 0.02 | 0.02 | 0.09 | 0.09 | 0.13 | 0.10 | 0.05 | 0.04 |

-----

|             |      |      |      |      |      |      |      |      |      |      |
|-------------|------|------|------|------|------|------|------|------|------|------|
| FRAG# 2:    | 0.00 | 0.01 | 0.00 | 0.00 | 0.01 | 0.03 | 0.00 | 0.01 | 0.01 | 0.00 |
| Net pop.(%) | 0.00 | 0.00 | 0.00 | 0.00 | 0.02 | 0.02 | 0.01 | 0.01 | 0.01 | 0.00 |

-----

|             |        |        |       |       |       |        |       |       |        |       |
|-------------|--------|--------|-------|-------|-------|--------|-------|-------|--------|-------|
| FRAG# 3:    | 100.01 | 100.00 | 99.96 | 99.93 | 99.93 | 99.96  | 99.76 | 99.81 | 99.98  | 99.93 |
| Net pop.(%) | 100.02 | 100.01 | 99.93 | 99.88 | 99.97 | 100.04 | 99.66 | 99.73 | 100.02 | 99.90 |

-----

|             |       |       |       |       |        |        |       |       |        |       |
|-------------|-------|-------|-------|-------|--------|--------|-------|-------|--------|-------|
| OP( 1 & 2 ) | 0.000 | 0.000 | 0.000 | 0.000 | 0.000  | 0.000  | 0.000 | 0.000 | 0.000  | 0.000 |
| OP( 1 & 3 ) | 0.000 | 0.000 | 0.000 | 0.001 | -0.001 | -0.002 | 0.002 | 0.002 | -0.001 | 0.001 |
| OP( 2 & 3 ) | 0.000 | 0.000 | 0.000 | 0.000 | 0.000  | 0.000  | 0.000 | 0.000 | 0.000  | 0.000 |

Alpha MO: 91 92 93 94 95 96 97 98 99 100  
Energy(eV): -22.11 -22.10 -20.48 -20.45 -19.38 -19.36 -19.29 -19.24 -18.85 -18.82  
Symmetry: A A A A A A A A A A

=====

|             |      |      |      |      |      |      |      |      |      |      |
|-------------|------|------|------|------|------|------|------|------|------|------|
| FRAG# 1:    | 0.01 | 0.01 | 0.62 | 0.28 | 1.03 | 1.43 | 0.24 | 0.29 | 3.28 | 2.09 |
| Net pop.(%) | 0.02 | 0.02 | 0.19 | 0.16 | 0.46 | 0.59 | 0.28 | 0.31 | 1.58 | 0.99 |

-----

|             |      |      |      |      |      |      |      |      |      |      |
|-------------|------|------|------|------|------|------|------|------|------|------|
| FRAG# 2:    | 0.01 | 0.00 | 0.05 | 0.07 | 0.16 | 0.45 | 0.01 | 0.01 | 2.31 | 0.77 |
| Net pop.(%) | 0.01 | 0.00 | 0.03 | 0.04 | 0.14 | 0.33 | 0.01 | 0.01 | 1.77 | 0.71 |

-----

|             |        |       |       |       |       |       |       |       |       |       |
|-------------|--------|-------|-------|-------|-------|-------|-------|-------|-------|-------|
| FRAG# 3:    | 99.98  | 99.98 | 99.33 | 99.65 | 98.81 | 98.11 | 99.75 | 99.70 | 94.41 | 97.13 |
| Net pop.(%) | 100.01 | 99.99 | 98.90 | 99.50 | 98.23 | 97.33 | 99.78 | 99.71 | 92.89 | 96.06 |

-----

|             |       |       |       |       |       |       |        |       |       |       |
|-------------|-------|-------|-------|-------|-------|-------|--------|-------|-------|-------|
| OP( 1 & 2 ) | 0.000 | 0.000 | 0.000 | 0.000 | 0.000 | 0.002 | 0.000  | 0.000 | 0.007 | 0.001 |
| OP( 1 & 3 ) | 0.000 | 0.000 | 0.008 | 0.002 | 0.011 | 0.015 | -0.001 | 0.000 | 0.027 | 0.021 |
| OP( 2 & 3 ) | 0.000 | 0.000 | 0.000 | 0.001 | 0.000 | 0.001 | 0.000  | 0.000 | 0.004 | 0.000 |

Alpha MO: 101 102 103 104 105 106 107 108 109 110  
Energy(eV): -18.61 -18.55 -18.36 -18.35 -18.13 -18.05 -17.98 -17.94 -17.70 -17.68  
Symmetry: A A A A A A A A A A

=====

|             |      |      |      |      |      |      |      |      |      |      |
|-------------|------|------|------|------|------|------|------|------|------|------|
| FRAG# 1:    | 0.59 | 0.42 | 0.83 | 0.76 | 3.45 | 1.82 | 2.53 | 1.62 | 0.00 | 0.24 |
| Net pop.(%) | 0.29 | 0.19 | 0.41 | 0.40 | 2.41 | 1.17 | 1.54 | 0.82 | 0.02 | 0.11 |

-----

|             |      |      |      |      |      |      |      |      |      |      |
|-------------|------|------|------|------|------|------|------|------|------|------|
| FRAG# 2:    | 0.00 | 0.01 | 0.24 | 0.15 | 0.11 | 0.03 | 8.95 | 1.93 | 0.08 | 0.23 |
| Net pop.(%) | 0.00 | 0.01 | 0.19 | 0.12 | 0.09 | 0.05 | 7.33 | 1.69 | 0.17 | 0.13 |

-----

|             |       |       |       |       |       |       |       |       |        |       |
|-------------|-------|-------|-------|-------|-------|-------|-------|-------|--------|-------|
| FRAG# 3:    | 99.41 | 99.56 | 98.94 | 99.09 | 96.44 | 98.15 | 88.52 | 96.45 | 99.92  | 99.53 |
| Net pop.(%) | 99.12 | 99.32 | 98.47 | 98.73 | 95.42 | 97.47 | 87.58 | 95.50 | 100.00 | 99.36 |

-----

|             |       |       |       |       |       |        |       |       |        |       |
|-------------|-------|-------|-------|-------|-------|--------|-------|-------|--------|-------|
| OP( 1 & 2 ) | 0.000 | 0.000 | 0.000 | 0.000 | 0.000 | -0.001 | 0.017 | 0.001 | 0.000  | 0.001 |
| OP( 1 & 3 ) | 0.006 | 0.005 | 0.008 | 0.007 | 0.020 | 0.014  | 0.003 | 0.015 | 0.000  | 0.002 |
| OP( 2 & 3 ) | 0.000 | 0.000 | 0.001 | 0.000 | 0.000 | 0.000  | 0.016 | 0.004 | -0.002 | 0.001 |

Alpha MO: 111 112 113 114 115 116 117 118 119 120  
HOMO-75 HOMO-74 HOMO-73 HOMO-72 HOMO-71 HOMO-70 HOMO-69 HOMO-68 HOMO-67 HOMO-66  
Energy(eV): -17.37 -17.13 -17.12 -16.92 -16.91 -16.89 -16.81 -16.78 -16.75 -16.60  
Symmetry: A A A A A A A A A A

=====

|             |       |      |      |      |      |      |      |      |      |      |
|-------------|-------|------|------|------|------|------|------|------|------|------|
| FRAG# 1:    | 13.43 | 0.92 | 0.45 | 0.06 | 1.68 | 0.05 | 3.28 | 0.57 | 0.71 | 1.81 |
| Net pop.(%) | 9.17  | 0.40 | 0.28 | 0.04 | 0.98 | 0.06 | 2.40 | 0.39 | 0.51 | 1.33 |

-----

|             |       |      |      |      |      |      |       |      |      |      |
|-------------|-------|------|------|------|------|------|-------|------|------|------|
| FRAG# 2:    | 48.64 | 1.97 | 1.01 | 0.18 | 3.86 | 0.03 | 13.91 | 0.02 | 0.10 | 0.06 |
| Net pop.(%) | 43.89 | 1.50 | 0.92 | 0.09 | 3.67 | 0.06 | 13.29 | 0.03 | 0.09 | 0.04 |

-----

|             |       |       |       |       |       |       |       |       |       |       |
|-------------|-------|-------|-------|-------|-------|-------|-------|-------|-------|-------|
| FRAG# 3:    | 37.93 | 97.11 | 98.55 | 99.76 | 94.46 | 99.91 | 82.81 | 99.40 | 99.18 | 98.13 |
| Net pop.(%) | 38.67 | 96.35 | 98.23 | 99.65 | 93.60 | 99.95 | 83.61 | 99.22 | 99.02 | 97.67 |

-----

|             |        |       |        |       |       |        |        |       |       |       |
|-------------|--------|-------|--------|-------|-------|--------|--------|-------|-------|-------|
| OP( 1 & 2 ) | 0.097  | 0.002 | -0.001 | 0.000 | 0.000 | 0.000  | 0.023  | 0.000 | 0.000 | 0.000 |
| OP( 1 & 3 ) | -0.012 | 0.008 | 0.004  | 0.000 | 0.014 | 0.000  | -0.005 | 0.004 | 0.004 | 0.009 |
| OP( 2 & 3 ) | -0.003 | 0.007 | 0.002  | 0.002 | 0.004 | -0.001 | -0.011 | 0.000 | 0.000 | 0.000 |

Alpha MO: 121 122 123 124 125 126 127 128 129 130  
HOMO-65 HOMO-64 HOMO-63 HOMO-62 HOMO-61 HOMO-60 HOMO-59 HOMO-58 HOMO-57 HOMO-56  
Energy(eV): -16.56 -16.45 -16.44 -16.41 -16.39 -16.16 -16.12 -16.09 -15.83 -15.80  
Symmetry: A A A A A A A A A A

=====

|             |      |      |      |      |      |      |      |      |      |      |
|-------------|------|------|------|------|------|------|------|------|------|------|
| FRAG# 1:    | 1.59 | 0.46 | 0.46 | 0.45 | 0.43 | 8.58 | 1.59 | 0.57 | 3.22 | 0.71 |
| Net pop.(%) | 1.08 | 0.26 | 0.35 | 0.31 | 0.24 | 6.66 | 1.25 | 0.36 | 2.17 | 0.35 |

-----

|             |      |      |      |      |      |       |      |      |      |      |
|-------------|------|------|------|------|------|-------|------|------|------|------|
| FRAG# 2:    | 0.06 | 2.22 | 0.02 | 0.14 | 1.61 | 70.48 | 0.03 | 0.05 | 7.55 | 6.96 |
| Net pop.(%) | 0.05 | 2.09 | 0.04 | 0.09 | 1.41 | 69.05 | 0.03 | 0.03 | 6.95 | 6.97 |

-----

|             |       |       |       |       |       |       |       |       |       |       |
|-------------|-------|-------|-------|-------|-------|-------|-------|-------|-------|-------|
| FRAG# 3:    | 98.35 | 97.31 | 99.52 | 99.41 | 97.96 | 20.94 | 98.37 | 99.38 | 89.23 | 92.33 |
| Net pop.(%) | 97.86 | 97.05 | 99.41 | 99.26 | 97.63 | 21.75 | 98.05 | 99.16 | 88.65 | 92.08 |

-----

|             |       |       |       |       |       |        |       |       |       |        |
|-------------|-------|-------|-------|-------|-------|--------|-------|-------|-------|--------|
| OP( 1 & 2 ) | 0.000 | 0.001 | 0.000 | 0.000 | 0.001 | 0.042  | 0.000 | 0.000 | 0.011 | 0.001  |
| OP( 1 & 3 ) | 0.010 | 0.003 | 0.002 | 0.002 | 0.003 | -0.003 | 0.007 | 0.004 | 0.010 | 0.006  |
| OP( 2 & 3 ) | 0.000 | 0.002 | 0.000 | 0.001 | 0.003 | -0.013 | 0.000 | 0.000 | 0.001 | -0.001 |

Alpha MO: 131 132 133 134 135 136 137 138 139 140  
HOMO-55 HOMO-54 HOMO-53 HOMO-52 HOMO-51 HOMO-50 HOMO-49 HOMO-48 HOMO-47 HOMO-46  
Energy(eV): -15.71 -15.71 -15.67 -15.60 -15.59 -15.49 -15.35 -15.35 -15.29 -15.26  
Symmetry: A A A A A A A A A A

=====

|             |      |      |      |      |       |      |      |      |      |      |
|-------------|------|------|------|------|-------|------|------|------|------|------|
| FRAG# 1:    | 9.03 | 4.14 | 2.50 | 0.48 | 10.09 | 3.30 | 0.52 | 0.61 | 1.13 | 4.88 |
| Net pop.(%) | 6.40 | 3.64 | 2.05 | 0.23 | 8.65  | 2.38 | 0.30 | 0.51 | 0.84 | 4.24 |

-----

|             |       |      |      |      |      |      |      |      |      |      |
|-------------|-------|------|------|------|------|------|------|------|------|------|
| FRAG# 2:    | 34.26 | 0.65 | 0.76 | 1.10 | 1.01 | 0.21 | 0.37 | 0.13 | 2.38 | 2.45 |
| Net pop.(%) | 31.15 | 0.55 | 0.57 | 1.20 | 0.86 | 0.20 | 0.39 | 0.14 | 2.33 | 1.88 |

-----

|             |       |       |       |       |       |       |       |       |       |       |
|-------------|-------|-------|-------|-------|-------|-------|-------|-------|-------|-------|
| FRAG# 3:    | 56.71 | 95.21 | 96.74 | 98.43 | 88.91 | 96.49 | 99.12 | 99.26 | 96.48 | 92.67 |
| Net pop.(%) | 55.43 | 94.82 | 96.43 | 98.29 | 87.75 | 95.66 | 98.89 | 99.18 | 96.41 | 92.25 |

-----

|             |       |       |       |        |        |        |       |       |        |       |
|-------------|-------|-------|-------|--------|--------|--------|-------|-------|--------|-------|
| OP( 1 & 2 ) | 0.045 | 0.002 | 0.003 | 0.000  | 0.004  | 0.001  | 0.000 | 0.000 | 0.003  | 0.008 |
| OP( 1 & 3 ) | 0.008 | 0.008 | 0.006 | 0.005  | 0.024  | 0.017  | 0.005 | 0.002 | 0.003  | 0.005 |
| OP( 2 & 3 ) | 0.018 | 0.000 | 0.001 | -0.002 | -0.001 | -0.001 | 0.000 | 0.000 | -0.002 | 0.004 |

Alpha MO: 141 142 143 144 145 146 147 148 149 150  
HOMO-45 HOMO-44 HOMO-43 HOMO-42 HOMO-41 HOMO-40 HOMO-39 HOMO-38 HOMO-37 HOMO-36  
Energy(eV): -15.24 -15.23 -15.23 -15.17 -15.04 -15.03 -14.96 -14.93 -14.86 -14.81  
Symmetry: A A A A A A A A A A

FRAG# 1: 1.73 11.09 1.07 8.27 1.39 1.99 3.34 2.45 4.35 0.23  
Net pop.(%) 1.43 10.04 0.77 6.59 0.86 1.63 3.06 1.72 3.28 0.10

FRAG# 2: 5.10 2.98 0.92 24.63 0.43 0.06 0.78 0.61 0.41 0.54  
Net pop.(%) 5.11 2.51 0.98 24.22 0.46 0.08 0.68 0.70 0.37 0.54

FRAG# 3: 93.16 85.93 98.01 67.11 98.18 97.95 95.88 96.93 95.24 99.23  
Net pop.(%) 93.19 85.48 97.77 68.24 97.64 97.57 95.77 96.29 94.27 99.16

OP( 1 & 2 ) 0.003 0.011 0.000 0.032 -0.001 0.000 0.003 0.000 0.001 0.001  
OP( 1 & 3 ) 0.003 0.010 0.006 0.001 0.011 0.007 0.003 0.015 0.020 0.002  
OP( 2 & 3 ) -0.003 -0.001 -0.001 -0.024 0.000 0.000 -0.001 -0.002 -0.001 -0.001

Alpha MO: 151 152 153 154 155 156 157 158 159 160  
HOMO-35 HOMO-34 HOMO-33 HOMO-32 HOMO-31 HOMO-30 HOMO-29 HOMO-28 HOMO-27 HOMO-26  
Energy(eV): -14.78 -14.78 -14.72 -14.66 -14.64 -14.61 -14.59 -14.29 -14.25 -14.19  
Symmetry: A A A A A A A A A A

FRAG# 1: 0.53 0.54 2.43 1.48 6.23 2.80 5.93 16.89 9.23 5.41  
Net pop.(%) 0.39 0.44 2.24 1.31 5.18 2.21 5.07 15.55 8.10 4.64

FRAG# 2: 0.00 0.01 1.23 0.68 1.03 0.40 1.10 22.12 0.61 1.88  
Net pop.(%) 0.01 0.01 1.04 0.58 1.28 0.36 1.40 18.57 0.70 2.20

FRAG# 3: 99.47 99.45 96.34 97.84 92.74 96.80 92.97 60.99 90.15 92.71  
Net pop.(%) 99.33 99.35 96.37 97.74 91.55 96.29 92.04 61.56 89.14 91.81

OP( 1 & 2 ) 0.000 0.000 0.004 0.002 -0.004 0.001 -0.004 0.055 0.000 -0.005  
OP( 1 & 3 ) 0.003 0.002 0.000 0.002 0.025 0.011 0.021 -0.028 0.022 0.020  
OP( 2 & 3 ) 0.000 0.000 0.000 0.000 -0.001 0.000 -0.002 0.016 -0.002 -0.002

Alpha MO: 161 162 163 164 165 166 167 168 169 170  
HOMO-25 HOMO-24 HOMO-23 HOMO-22 HOMO-21 HOMO-20 HOMO-19 HOMO-18 HOMO-17 HOMO-16  
Energy(eV): -14.07 -13.99 -13.46 -13.39 -13.14 -13.02 -12.95 -12.89 -12.74 -12.61  
Symmetry: A A A A A A A A A A

FRAG# 1: 9.84 10.28 18.27 10.37 36.91 27.76 15.35 58.85 67.42 71.14  
Net pop.(%) 8.18 8.61 17.01 9.39 35.21 26.81 14.64 58.12 67.97 70.69

FRAG# 2: 0.34 1.16 2.62 0.73 6.13 0.53 0.13 5.40 1.59 3.78  
Net pop.(%) 0.53 1.54 2.13 0.64 6.06 0.65 0.19 4.64 1.81 3.40

FRAG# 3: 89.82 88.55 79.11 88.90 56.96 71.71 84.52 35.75 30.99 25.08  
Net pop.(%) 88.03 86.76 77.92 88.04 55.40 70.66 83.70 35.94 31.22 24.96

OP( 1 & 2 ) -0.003 -0.005 0.006 0.002 0.002 -0.002 -0.002 0.017 -0.005 0.007  
OP( 1 & 3 ) 0.036 0.038 0.020 0.017 0.032 0.021 0.016 -0.002 -0.006 0.002  
OP( 2 & 3 ) -0.001 -0.003 0.004 0.000 -0.001 0.000 0.001 -0.002 0.001 0.000

Alpha MO: 171 172 173 174 175 176 177 178 179 180  
HOMO-15 HOMO-14 HOMO-13 HOMO-12 HOMO-11 HOMO-10 HOMO-9 HOMO-8 HOMO-7 HOMO-6  
Energy(eV): -12.56 -12.53 -12.39 -12.30 -12.04 -11.95 -10.98 -10.98 -10.96 -10.93  
Symmetry: A A A A A A A A A A

=====

|             |       |       |      |       |       |       |      |      |      |      |
|-------------|-------|-------|------|-------|-------|-------|------|------|------|------|
| FRAG# 1:    | 83.98 | 67.87 | 7.62 | 81.51 | 73.64 | 87.49 | 3.99 | 0.97 | 0.60 | 0.68 |
| Net pop.(%) | 87.16 | 68.98 | 6.12 | 81.80 | 77.21 | 87.88 | 4.53 | 1.17 | 0.55 | 0.77 |

-----

|             |      |      |       |      |       |      |      |      |      |      |
|-------------|------|------|-------|------|-------|------|------|------|------|------|
| FRAG# 2:    | 6.52 | 7.42 | 17.45 | 0.63 | 13.79 | 0.58 | 1.05 | 0.06 | 0.17 | 5.92 |
| Net pop.(%) | 9.02 | 8.92 | 16.45 | 0.62 | 17.34 | 0.48 | 1.19 | 0.10 | 0.27 | 5.82 |

-----

|             |       |       |       |       |       |       |       |       |       |       |
|-------------|-------|-------|-------|-------|-------|-------|-------|-------|-------|-------|
| FRAG# 3:    | 9.50  | 24.71 | 74.93 | 17.86 | 12.57 | 11.93 | 94.96 | 98.97 | 99.23 | 93.40 |
| Net pop.(%) | 10.35 | 25.18 | 73.84 | 18.15 | 13.44 | 12.35 | 95.29 | 99.13 | 99.22 | 93.20 |

-----

|           |        |        |       |        |        |        |        |        |        |        |
|-----------|--------|--------|-------|--------|--------|--------|--------|--------|--------|--------|
| OP(1 & 2) | -0.048 | -0.021 | 0.014 | 0.000  | -0.063 | 0.001  | -0.003 | -0.001 | 0.000  | -0.002 |
| OP(1 & 3) | -0.015 | -0.001 | 0.016 | -0.006 | -0.009 | -0.009 | -0.007 | -0.003 | 0.002  | 0.000  |
| OP(2 & 3) | -0.002 | -0.009 | 0.006 | 0.000  | -0.008 | 0.001  | 0.001  | 0.000  | -0.001 | 0.004  |

Alpha MO: 181 182 183 184 185 186 187 188 189 190  
HOMO-5 HOMO-4 HOMO-3 HOMO-2 HOMO-1 HOMO LUMO LUMO+1 LUMO+2 LUMO+3  
Energy(eV): -10.91 -10.85 -10.72 -10.70 -10.58 -10.41 -7.65 -5.29 -5.16 -5.09  
Symmetry: A A A A A A A A A A

=====

|             |      |       |      |       |       |       |       |       |       |       |
|-------------|------|-------|------|-------|-------|-------|-------|-------|-------|-------|
| FRAG# 1:    | 0.70 | 10.31 | 8.48 | 14.22 | 16.28 | 40.71 | 51.86 | 11.55 | 15.25 | 17.35 |
| Net pop.(%) | 0.71 | 10.92 | 9.93 | 16.05 | 19.91 | 46.88 | 64.67 | 8.84  | 20.39 | 20.23 |

-----

|             |       |      |      |      |       |       |       |       |      |      |
|-------------|-------|------|------|------|-------|-------|-------|-------|------|------|
| FRAG# 2:    | 51.29 | 0.20 | 2.67 | 2.21 | 28.99 | 8.48  | 28.00 | 69.52 | 0.05 | 0.64 |
| Net pop.(%) | 51.52 | 0.70 | 2.86 | 3.23 | 29.97 | 11.59 | 37.22 | 65.36 | 0.90 | 3.20 |

-----

|             |       |       |       |       |       |       |       |       |       |       |
|-------------|-------|-------|-------|-------|-------|-------|-------|-------|-------|-------|
| FRAG# 3:    | 48.01 | 89.49 | 88.85 | 83.57 | 54.73 | 50.82 | 20.14 | 18.93 | 84.70 | 82.01 |
| Net pop.(%) | 48.07 | 89.90 | 90.15 | 84.78 | 56.87 | 54.77 | 27.22 | 17.46 | 88.68 | 82.63 |

-----

|           |        |        |        |        |        |        |        |       |        |        |
|-----------|--------|--------|--------|--------|--------|--------|--------|-------|--------|--------|
| OP(1 & 2) | -0.002 | -0.007 | -0.003 | -0.016 | -0.025 | -0.053 | -0.149 | 0.054 | -0.020 | -0.048 |
| OP(1 & 3) | 0.002  | -0.005 | -0.026 | -0.020 | -0.048 | -0.070 | -0.107 | 0.000 | -0.083 | -0.009 |
| OP(2 & 3) | -0.003 | -0.003 | 0.000  | -0.004 | 0.005  | -0.009 | -0.035 | 0.029 | 0.003  | -0.003 |



Alpha MO: 31 32 33 34 35 36 37 38 39 40  
Energy(eV): -281.47 -281.46 -281.43 -281.35 -281.29 -281.20 -281.15 -281.11 -281.01 -281.00  
Symmetry: A A A A A A A A A A

FRAG# 1: -0.01 -0.01 0.00 -0.01 0.00 0.00 -0.01 0.00 0.00 0.00

FRAG# 2: 0.00 0.00 0.00 0.00 0.00 0.00 0.00 0.00 0.00 0.00

FRAG# 3: 100.01 100.01 100.00 100.00 100.00 100.00 100.01 100.00 100.01 100.00  
Net pop.(%) 100.02 100.03 100.01 100.02 100.01 100.01 100.02 100.01 100.01 100.01

OP( 1 & 2 ) 0.000 0.000 0.000 0.000 0.000 0.000 0.000 0.000 0.000 0.000  
OP( 1 & 3 ) 0.000 0.000 0.000 0.000 0.000 0.000 0.000 0.000 0.000 0.000  
OP( 2 & 3 ) 0.000 0.000 0.000 0.000 0.000 0.000 0.000 0.000 0.000 0.000

Alpha MO: 41 42 43 44 45 46 47 48 49 50  
Energy(eV): -280.73 -280.58 -280.44 -280.42 -280.22 -280.19 -280.17 -279.96 -279.77 -279.64  
Symmetry: A A A A A A A A A A

FRAG# 1: -0.01 -0.01 0.01 0.01 0.00 0.00 0.00 0.00 0.00 0.00  
p orbitals: 0.00 -0.01 0.00 0.00 0.00 0.00 0.00 0.00 0.00 0.00

FRAG# 2: 0.00 0.00 0.00 0.00 0.00 0.00 0.00 0.00 0.00 0.00

FRAG# 3: 100.01 100.01 100.00 99.99 100.00 100.00 100.00 100.00 100.00 100.00  
Net pop.(%) 100.01 100.02 99.99 99.99 100.00 99.99 100.00 100.00 100.00 100.00

OP( 1 & 2 ) 0.000 0.000 0.000 0.000 0.000 0.000 0.000 0.000 0.000 0.000  
OP( 1 & 3 ) 0.000 0.000 0.000 0.000 0.000 0.000 0.000 0.000 0.000 0.000  
OP( 2 & 3 ) 0.000 0.000 0.000 0.000 0.000 0.000 0.000 0.000 0.000 0.000

Alpha MO: 51 52 53 54 55 56 57 58 59 60  
Energy(eV): -279.34 -279.33 -279.30 -279.29 -279.28 -279.19 -279.19 -279.17 -279.10 -279.03  
Symmetry: A A A A A A A A A A

FRAG# 1: 0.00 0.00 0.01 0.01 0.00 0.00 0.00 0.00 0.01 0.00  
FRAG# 2: 0.00 0.00 0.00 0.00 0.00 0.00 0.00 0.00 0.00 0.00

FRAG# 3: 100.00 100.00 99.99 99.99 100.00 100.00 100.00 100.00 99.99 100.00  
Net pop.(%) 99.99 100.00 99.99 99.99 100.00 100.00 100.00 100.00 99.99 100.00

OP( 1 & 2 ) 0.000 0.000 0.000 0.000 0.000 0.000 0.000 0.000 0.000 0.000  
OP( 1 & 3 ) 0.000 0.000 0.000 0.000 0.000 0.000 0.000 0.000 0.000 0.000  
OP( 2 & 3 ) 0.000 0.000 0.000 0.000 0.000 0.000 0.000 0.000 0.000 0.000

Alpha MO: 61 62 63 64 65 66 67 68 69 70  
Energy(eV): -278.94 -278.83 -123.78 -123.68 -82.96 -82.93 -82.88 -82.81 -81.98 -81.86  
Symmetry: A A A A A A A A A A

FRAG# 1: 0.00 0.00 100.31 100.22 99.86 99.94 99.84 99.92 99.90 99.84  
Net pop.(%) 0.00 0.00 100.63 100.46 99.74 99.88 99.71 99.85 99.84 99.73

FRAG# 2: 0.00 0.00 -0.09 -0.07 0.05 0.08 0.07 0.05 0.01 0.02

FRAG# 3: 100.00 100.00 -0.22 -0.15 0.09 -0.02 0.08 0.03 0.09 0.14  
Net pop.(%) 100.00 100.00 0.01 0.01 0.02 0.01 0.02 0.01 0.02 0.04

OP( 1 & 2 ) 0.000 0.000 -0.002 -0.001 0.001 0.001 0.001 0.001 0.000 0.000  
OP( 1 & 3 ) 0.000 0.000 -0.005 -0.003 0.001 0.000 0.001 0.000 0.001 0.002  
OP( 2 & 3 ) 0.000 0.000 0.000 0.000 0.000 0.000 0.000 0.000 0.000 0.000

Alpha MO: 71 72 73 74 75 76 77 78 79 80  
Energy(eV): -33.92 -33.84 -32.92 -32.83 -31.69 -31.51 -30.28 -28.98 -28.90 -28.86  
Symmetry: A A A A A A A A A A

FRAG# 1: -0.84 -0.89 -0.26 -0.35 -0.91 -0.70 4.44 -0.16 3.11 -0.28  
Net pop.(%) 0.06 0.05 0.02 0.04 0.21 0.16 2.45 0.13 1.67 0.12

FRAG# 2: 0.01 0.01 0.00 0.00 0.73 0.67 92.13 2.23 90.48 3.05  
Net pop.(%) 0.01 0.01 0.00 0.00 0.58 0.54 88.81 2.21 88.33 3.04

FRAG# 3: 100.83 100.88 100.26 100.35 100.18 100.04 3.42 97.93 6.41 97.23  
Net pop.(%) 101.73 101.82 100.54 100.73 101.13 100.78 3.40 98.34 5.68 97.71

OP( 1 & 2 ) 0.000 0.000 0.000 0.000 0.000 0.000 0.053 0.001 0.029 0.001  
OP( 1 & 3 ) -0.018 -0.019 -0.006 -0.008 -0.022 -0.017 -0.013 -0.007 0.000 -0.009  
OP( 2 & 3 ) 0.000 0.000 0.000 0.000 0.003 0.002 0.013 -0.001 0.014 -0.001

Alpha MO: 81 82 83 84 85 86 87 88 89 90  
Energy(eV): -27.45 -27.33 -27.27 -27.13 -26.74 -26.60 -26.46 -26.44 -25.97 -25.90  
Symmetry: A A A A A A A A A A

FRAG# 1: 0.13 -0.08 0.30 0.22 0.01 0.11 0.11 0.05 -0.17 0.02  
Net pop.(%) 0.05 0.04 0.13 0.11 0.07 0.08 0.10 0.07 0.03 0.02

FRAG# 2: 0.07 0.15 0.14 0.12 0.13 0.11 0.05 0.10 0.07 0.01  
Net pop.(%) 0.07 0.17 0.18 0.15 0.15 0.12 0.08 0.13 0.09 0.01

FRAG# 3: 99.81 99.93 99.56 99.66 99.86 99.78 99.83 99.85 100.10 99.97  
Net pop.(%) 99.74 100.07 99.42 99.59 99.94 99.75 99.82 99.87 100.33 99.96

OP( 1 & 2 ) 0.000 0.000 0.000 0.000 0.000 0.000 0.000 0.000 0.000 0.000  
OP( 1 & 3 ) 0.002 -0.002 0.003 0.002 -0.001 0.001 0.000 0.000 -0.004 0.000  
OP( 2 & 3 ) 0.000 0.000 -0.001 -0.001 0.000 0.000 0.000 0.000 0.000 0.000

Alpha MO: 91 92 93 94 95 96 97 98 99 100  
Energy(eV): -25.83 -25.74 -25.38 -25.28 -23.82 -23.69 -22.91 -22.77 -22.73 -22.67  
Symmetry: A A A A A A A A A A

FRAG# 1: -0.02 0.07 0.04 0.04 -0.02 0.00 0.75 0.77 -0.19 0.11  
Net pop.(%) 0.03 0.01 0.02 0.02 0.04 0.03 0.29 0.26 0.02 0.02

FRAG# 2: 0.06 0.01 0.01 0.02 0.01 0.01 0.17 0.20 0.05 0.02  
Net pop.(%) 0.08 0.01 0.01 0.02 0.01 0.01 0.14 0.15 0.02 0.01

FRAG# 3: 99.96 99.92 99.95 99.93 100.01 100.00 99.08 99.03 100.15 99.87  
Net pop.(%) 100.02 99.86 99.93 99.90 100.07 100.04 98.60 98.49 100.34 99.77

OP( 1 & 2 ) 0.000 0.000 0.000 0.000 0.000 0.000 0.000 0.000 0.000 0.000  
OP( 1 & 3 ) -0.001 0.001 0.000 0.001 -0.001 -0.001 0.009 0.010 -0.004 0.002  
OP( 2 & 3 ) 0.000 0.000 0.000 0.000 0.000 0.000 0.001 0.001 0.001 0.000

Alpha MO: 101 102 103 104 105 106 107 108 109 110  
Energy(eV): -22.64 -22.60 -22.55 -22.51 -22.40 -22.29 -22.24 -22.16 -21.53 -21.45  
Symmetry: A A A A A A A A A A

FRAG# 1: -0.04 0.00 0.07 0.06 0.00 0.32 0.03 0.33 0.30 0.25  
Net pop.(%) 0.02 0.03 0.02 0.02 0.01 0.26 0.01 0.25 0.12 0.09

FRAG# 2: 0.15 0.09 0.12 0.01 0.04 0.06 0.00 0.05 0.07 0.07  
Net pop.(%) 0.16 0.06 0.13 0.01 0.03 0.07 0.00 0.05 0.08 0.07

FRAG# 3: 99.89 99.91 99.81 99.93 99.96 99.61 99.96 99.62 99.63 99.69  
Net pop.(%) 99.95 99.91 99.76 99.88 99.96 99.57 99.94 99.56 99.43 99.51

OP( 1 & 2 ) 0.000 0.000 0.000 0.000 0.000 0.000 0.000 0.000 0.000 0.000  
OP( 1 & 3 ) -0.001 -0.001 0.001 0.001 0.000 0.001 0.000 0.001 0.004 0.003  
OP( 2 & 3 ) 0.000 0.001 0.000 0.000 0.000 0.000 0.000 0.000 0.000 0.000

Alpha MO: 111 112 113 114 115 116 117 118 119 120  
Energy(eV): -21.26 -21.14 -20.82 -20.73 -20.55 -20.42 -19.99 -19.91 -19.66 -19.49  
Symmetry: A A A A A A A A A A

=====

FRAG# 1: 0.08 0.09 0.06 0.17 1.26 0.98 2.65 2.19 1.77 1.24  
Net pop.(%) 0.06 0.06 0.05 0.08 0.63 0.54 1.66 1.36 0.85 0.60

-----

FRAG# 2: 0.02 0.01 0.01 0.05 0.38 0.37 0.18 0.17 0.36 0.25  
Net pop.(%) 0.01 0.01 0.01 0.04 0.40 0.40 0.10 0.08 0.24 0.24

-----

FRAG# 3: 99.90 99.90 99.93 99.78 98.36 98.65 97.17 97.64 97.86 98.50  
Net pop.(%) 99.88 99.87 99.92 99.70 97.76 98.23 96.08 96.71 96.92 97.78

-----

OP( 1 & 2 ) 0.000 0.000 0.000 0.000 0.000 0.000 0.000 0.000 0.001 -0.001  
OP( 1 & 3 ) 0.000 0.001 0.000 0.002 0.012 0.009 0.020 0.017 0.018 0.014  
OP( 2 & 3 ) 0.000 0.000 0.000 0.000 0.000 0.000 0.002 0.002 0.001 0.001

Alpha MO: 121 122 123 124 125 126 127 128 129 130  
Energy(eV): -19.32 -19.21 -18.88 -18.79 -18.58 -18.42 -18.42 -18.26 -17.81 -17.64  
Symmetry: A A A A A A A A A A

=====

FRAG# 1: 0.35 0.36 0.39 0.28 0.29 1.11 0.44 1.22 4.87 2.21  
Net pop.(%) 0.16 0.18 0.32 0.25 0.20 0.82 0.33 0.89 4.21 1.65

-----

FRAG# 2: 0.02 0.02 0.20 0.20 0.11 0.35 0.22 0.36 5.14 2.37  
Net pop.(%) 0.01 0.01 0.15 0.17 0.09 0.24 0.17 0.25 3.81 1.70

-----

FRAG# 3: 99.62 99.62 99.41 99.51 99.60 98.54 99.34 98.41 89.98 95.42  
Net pop.(%) 99.42 99.43 99.31 99.43 99.46 98.30 99.22 98.12 89.13 94.64

-----

OP( 1 & 2 ) 0.000 0.000 0.000 0.000 0.000 0.002 0.000 0.002 0.011 0.005  
OP( 1 & 3 ) 0.004 0.004 0.001 0.001 0.002 0.004 0.002 0.005 0.002 0.007  
OP( 2 & 3 ) 0.000 0.000 0.001 0.001 0.001 0.001 0.001 0.001 0.015 0.009

Alpha MO: 131 132 133 134 135 136 137 138 139 140  
Energy(eV): -17.45 -17.41 -17.23 -17.19 -17.15 -17.07 -17.02 -16.93 -16.85 -16.76  
Symmetry: A A A A A A A A A A

=====

FRAG# 1: 1.55 5.26 6.74 8.20 10.52 3.50 7.24 12.99 12.24 8.78  
Net pop.(%) 0.99 3.59 5.25 5.72 8.97 2.78 6.10 11.25 10.66 7.28

-----

FRAG# 2: 0.57 4.34 3.31 4.89 2.79 0.88 2.25 9.60 5.28 2.64  
Net pop.(%) 0.54 3.15 2.50 3.65 2.36 0.76 1.88 7.93 4.55 2.24

-----

FRAG# 3: 97.88 90.40 89.95 86.91 86.69 95.61 90.50 77.41 82.48 88.57  
Net pop.(%) 97.38 89.18 88.85 85.12 85.82 95.07 89.84 76.33 81.80 87.13

-----

OP( 1 & 2 ) 0.001 0.016 0.012 0.019 0.011 0.003 0.008 0.023 0.016 0.005  
OP( 1 & 3 ) 0.010 0.017 0.018 0.030 0.020 0.011 0.014 0.011 0.015 0.025  
OP( 2 & 3 ) 0.000 0.007 0.004 0.005 -0.003 -0.001 -0.001 0.010 -0.002 0.003



Alpha MO: 141 142 143 144 145 146 147 148 149 150  
HOMO-77 HOMO-76 HOMO-75 HOMO-74 HOMO-73 HOMO-72 HOMO-71 HOMO-70 HOMO-69 HOMO-68  
Energy(eV): -16.68 -16.65 -16.59 -16.52 -16.46 -16.42 -16.33 -16.27 -16.25 -16.08  
Symmetry: A A A A A A A A A A

FRAG# 1: 4.36 10.44 5.67 4.70 5.28 6.05 17.87 4.75 3.91 7.80  
Net pop.(%) 3.87 8.70 4.50 4.15 4.28 5.32 16.34 3.99 3.12 6.68

FRAG# 2: 5.47 7.07 7.68 5.17 1.94 4.36 14.69 3.13 2.80 5.34  
Net pop.(%) 4.39 6.13 6.18 4.65 1.78 3.75 12.95 2.84 2.08 4.39

FRAG# 3: 90.17 82.49 86.65 90.12 92.77 89.58 67.44 92.13 93.29 86.86  
Net pop.(%) 89.56 81.37 85.25 90.05 91.97 89.46 68.31 91.99 92.63 86.13

OP( 1 & 2 ) 0.010 0.016 0.013 0.010 0.004 0.012 0.041 0.009 0.008 0.013  
OP( 1 & 3 ) 0.000 0.019 0.011 0.001 0.016 0.002 -0.011 0.006 0.007 0.009  
OP( 2 & 3 ) 0.012 0.003 0.017 0.000 0.000 0.000 -0.007 -0.003 0.006 0.006

Alpha MO: 151 152 153 154 155 156 157 158 159 160  
HOMO-67 HOMO-66 HOMO-65 HOMO-64 HOMO-63 HOMO-62 HOMO-61 HOMO-60 HOMO-59 HOMO-58  
Energy(eV): -16.05 -15.99 -15.97 -15.91 -15.89 -15.80 -15.77 -15.70 -15.67 -15.55  
Symmetry: A A A A A A A A A A

FRAG# 1: 3.44 4.75 4.13 6.74 3.77 2.09 7.58 2.95 2.52 9.26  
Net pop.(%) 3.05 4.36 3.63 5.73 3.19 1.80 6.70 2.66 2.32 9.09

FRAG# 2: 2.25 2.42 1.35 3.16 1.31 1.48 4.68 1.97 1.77 1.79  
Net pop.(%) 2.03 2.16 1.15 2.62 1.20 1.30 3.79 1.61 1.38 1.99

FRAG# 3: 94.31 92.84 94.52 90.10 94.92 96.43 87.74 95.08 95.72 88.96  
Net pop.(%) 94.25 92.84 94.26 89.40 94.56 96.38 87.28 94.84 95.52 89.63

OP( 1 & 2 ) 0.006 0.006 0.004 0.008 0.003 0.004 0.013 0.004 0.004 0.006  
OP( 1 & 3 ) 0.002 0.001 0.006 0.012 0.008 0.001 0.004 0.002 0.000 -0.003  
OP( 2 & 3 ) -0.001 -0.001 0.000 0.002 -0.001 0.000 0.005 0.003 0.004 -0.010

Alpha MO: 161 162 163 164 165 166 167 168 169 170  
HOMO-57 HOMO-56 HOMO-55 HOMO-54 HOMO-53 HOMO-52 HOMO-51 HOMO-50 HOMO-49 HOMO-48  
Energy(eV): -15.51 -15.43 -15.35 -15.30 -15.24 -15.17 -15.14 -15.12 -14.85 -14.75  
Symmetry: A A A A A A A A A A

FRAG# 1: 7.87 5.14 21.80 17.28 14.16 3.60 9.12 26.34 40.86 53.02  
Net pop.(%) 7.10 4.86 19.63 16.12 12.67 3.27 8.63 25.51 39.87 52.94

FRAG# 2: 4.23 2.13 9.45 7.03 4.39 1.20 3.50 8.47 8.68 3.92  
Net pop.(%) 3.57 1.85 8.36 6.01 3.83 1.05 3.34 8.21 7.33 3.50

FRAG# 3: 87.90 92.73 68.76 75.68 81.46 95.20 87.37 65.19 50.46 43.06  
Net pop.(%) 87.72 92.88 68.06 75.54 80.45 95.05 87.32 67.24 50.06 43.28

OP( 1 & 2 ) 0.013 0.007 0.026 0.020 0.010 0.003 0.006 0.031 0.019 0.007  
OP( 1 & 3 ) 0.003 -0.002 0.018 0.003 0.019 0.003 0.004 -0.015 0.001 -0.006  
OP( 2 & 3 ) 0.001 -0.002 -0.004 0.000 0.001 0.000 -0.003 -0.026 0.008 0.001

Alpha MO: 171 172 173 174 175 176 177 178 179 180  
HOMO-47 HOMO-46 HOMO-45 HOMO-44 HOMO-43 HOMO-42 HOMO-41 HOMO-40 HOMO-39 HOMO-38  
Energy(eV): -14.68 -14.66 -14.55 -14.43 -14.36 -14.31 -14.27 -14.24 -14.24 -14.22  
Symmetry: A A A A A A A A A A

FRAG# 1: 26.75 9.57 14.56 21.97 71.86 25.46 56.92 2.68 7.40 21.89  
Net pop.(%) 25.95 9.39 14.26 20.84 70.55 25.28 56.48 2.47 6.82 20.88

FRAG# 2: 3.92 1.55 1.81 7.17 2.01 2.59 2.37 0.10 1.44 4.89  
Net pop.(%) 3.41 1.50 1.62 6.64 1.93 2.54 2.11 0.11 1.48 5.58

FRAG# 3: 69.34 88.88 83.63 70.86 26.14 71.95 40.71 97.22 91.16 73.22  
Net pop.(%) 69.75 88.75 83.72 69.48 25.02 71.80 40.36 96.99 90.67 72.99

OP(1 & 2) 0.017 0.001 0.006 0.003 0.003 0.001 0.003 0.000 0.001 0.001  
OP(1 & 3) -0.001 0.003 0.000 0.020 0.023 0.003 0.005 0.005 0.011 0.019  
OP(2 & 3) -0.007 0.000 -0.002 0.008 -0.001 0.000 0.002 0.000 -0.001 -0.015

Alpha MO: 181 182 183 184 185 186 187 188 189 190  
HOMO-37 HOMO-36 HOMO-35 HOMO-34 HOMO-33 HOMO-32 HOMO-31 HOMO-30 HOMO-29 HOMO-28  
Energy(eV): -14.16 -14.11 -14.00 -13.98 -13.89 -13.81 -13.76 -13.62 -13.54 -13.45  
Symmetry: A A A A A A A A A A

FRAG# 1: 9.94 28.09 4.29 4.43 12.16 10.36 12.26 6.87 4.27 4.52  
Net pop.(%) 9.45 26.80 3.80 4.28 11.51 10.03 10.98 6.76 4.09 4.58

FRAG# 2: 3.07 1.28 1.39 0.71 5.44 1.91 11.95 1.96 2.73 1.51  
Net pop.(%) 3.44 1.14 1.16 0.58 5.22 1.86 11.55 1.90 2.59 1.58

FRAG# 3: 86.99 70.63 94.32 94.87 82.41 87.74 75.79 91.17 92.99 93.97  
Net pop.(%) 86.87 69.26 93.54 94.53 81.70 87.40 75.62 91.16 92.80 93.97

OP(1 & 2) 0.000 0.001 -0.001 -0.001 0.002 0.000 0.015 0.002 0.001 -0.001  
OP(1 & 3) 0.010 0.025 0.010 0.004 0.011 0.006 0.010 0.001 0.002 0.000  
OP(2 & 3) -0.007 0.002 0.005 0.003 0.003 0.001 -0.007 0.000 0.002 0.000

Alpha MO: 191 192 193 194 195 196 197 198 199 200  
HOMO-27 HOMO-26 HOMO-25 HOMO-24 HOMO-23 HOMO-22 HOMO-21 HOMO-20 HOMO-19 HOMO-18  
Energy(eV): -13.37 -13.33 -13.29 -13.23 -13.21 -13.16 -13.09 -13.02 -12.99 -12.88  
Symmetry: A A A A A A A A A A

FRAG# 1: 6.19 7.52 5.67 8.45 1.61 20.54 8.31 7.12 1.51 5.71  
Net pop.(%) 6.57 7.74 5.74 8.47 1.63 21.33 8.42 7.36 1.52 6.01

FRAG# 2: 2.43 2.46 5.22 7.47 1.22 12.56 5.40 4.83 0.61 2.44  
Net pop.(%) 2.52 2.57 5.41 7.83 1.33 12.99 5.54 4.82 0.61 2.38

FRAG# 3: 91.37 90.01 89.12 84.08 97.17 66.91 86.29 88.06 97.88 91.85  
Net pop.(%) 92.33 90.38 89.60 85.58 97.41 66.84 86.28 87.86 97.80 92.26

OP(1 & 2) 0.005 0.001 0.002 0.011 0.001 -0.013 -0.003 -0.004 -0.001 0.002  
OP(1 & 3) -0.012 -0.005 -0.004 -0.012 -0.001 -0.003 0.000 -0.001 0.001 -0.008  
OP(2 & 3) -0.007 -0.003 -0.006 -0.018 -0.003 0.004 0.000 0.005 0.001 -0.001

Alpha MO: 201 202 203 204 205 206 207 208 209 210  
HOMO-17 HOMO-16 HOMO-15 HOMO-14 HOMO-13 HOMO-12 HOMO-11 HOMO-10 HOMO-9 HOMO-8  
Energy(eV): -12.85 -12.79 -12.71 -12.67 -12.56 -12.50 -12.41 -12.31 -12.02 -11.96  
Symmetry: A A A A A A A A A A

=====

|             |      |      |      |      |       |       |       |       |      |       |
|-------------|------|------|------|------|-------|-------|-------|-------|------|-------|
| FRAG# 1:    | 2.94 | 6.75 | 3.69 | 3.83 | 16.33 | 15.70 | 14.29 | 18.63 | 5.60 | 11.95 |
| Net pop.(%) | 3.16 | 6.96 | 3.88 | 3.86 | 17.40 | 16.23 | 14.78 | 19.14 | 6.43 | 13.28 |

-----

|             |      |      |      |      |       |       |       |      |      |      |
|-------------|------|------|------|------|-------|-------|-------|------|------|------|
| FRAG# 2:    | 1.16 | 4.90 | 2.89 | 3.79 | 19.28 | 16.16 | 17.41 | 9.06 | 2.07 | 2.64 |
| Net pop.(%) | 1.50 | 5.14 | 2.91 | 3.98 | 21.07 | 17.86 | 18.86 | 9.75 | 2.15 | 2.59 |

-----

|             |       |       |       |       |       |       |       |       |       |       |
|-------------|-------|-------|-------|-------|-------|-------|-------|-------|-------|-------|
| FRAG# 3:    | 95.90 | 88.35 | 93.43 | 92.38 | 64.39 | 68.14 | 68.30 | 72.30 | 92.33 | 85.42 |
| Net pop.(%) | 96.27 | 88.65 | 93.82 | 92.61 | 66.50 | 70.40 | 70.25 | 73.26 | 93.25 | 86.91 |

-----

|             |        |        |        |        |        |        |        |        |        |        |
|-------------|--------|--------|--------|--------|--------|--------|--------|--------|--------|--------|
| OP( 1 & 2 ) | -0.002 | -0.002 | 0.002  | 0.000  | -0.008 | 0.000  | 0.000  | -0.002 | 0.000  | 0.002  |
| OP( 1 & 3 ) | -0.003 | -0.003 | -0.006 | -0.001 | -0.014 | -0.011 | -0.010 | -0.008 | -0.017 | -0.029 |
| OP( 2 & 3 ) | -0.005 | -0.003 | -0.002 | -0.004 | -0.028 | -0.034 | -0.029 | -0.011 | -0.002 | -0.001 |

Alpha MO: 211 212 213 214 215 216 217 218 219 220  
HOMO-7 HOMO-6 HOMO-5 HOMO-4 HOMO-3 HOMO-2 HOMO-1 HOMO LUMO LUMO+1  
Energy(eV): -11.88 -11.84 -11.75 -11.57 -11.41 -11.30 -11.29 -11.15 -9.18 -8.91  
Symmetry: A A A A A A A A A A

=====

|             |      |      |       |       |      |      |      |      |       |       |
|-------------|------|------|-------|-------|------|------|------|------|-------|-------|
| FRAG# 1:    | 0.39 | 3.12 | 25.52 | 17.45 | 0.38 | 0.82 | 0.16 | 0.03 | 31.98 | 42.44 |
| Net pop.(%) | 0.61 | 3.60 | 29.78 | 20.73 | 0.43 | 0.91 | 0.28 | 0.10 | 43.32 | 54.47 |

-----

|             |      |      |       |       |      |      |      |      |       |       |
|-------------|------|------|-------|-------|------|------|------|------|-------|-------|
| FRAG# 2:    | 0.66 | 4.42 | 33.73 | 72.32 | 0.18 | 0.44 | 0.19 | 0.12 | 53.84 | 36.13 |
| Net pop.(%) | 0.70 | 4.73 | 37.26 | 76.68 | 0.20 | 0.49 | 0.21 | 0.13 | 63.04 | 44.98 |

-----

|             |       |       |       |       |       |       |       |       |       |       |
|-------------|-------|-------|-------|-------|-------|-------|-------|-------|-------|-------|
| FRAG# 3:    | 98.94 | 92.46 | 40.75 | 10.22 | 99.45 | 98.73 | 99.65 | 99.85 | 14.18 | 21.43 |
| Net pop.(%) | 99.09 | 92.96 | 43.47 | 11.80 | 99.52 | 98.84 | 99.76 | 99.92 | 19.05 | 31.52 |

-----

|             |        |        |        |        |        |        |        |        |        |        |
|-------------|--------|--------|--------|--------|--------|--------|--------|--------|--------|--------|
| OP( 1 & 2 ) | -0.001 | -0.003 | -0.051 | -0.061 | 0.000  | 0.000  | 0.000  | 0.000  | -0.157 | -0.108 |
| OP( 1 & 3 ) | -0.003 | -0.007 | -0.034 | -0.005 | -0.001 | -0.002 | -0.002 | -0.001 | -0.070 | -0.133 |
| OP( 2 & 3 ) | 0.000  | -0.003 | -0.020 | -0.027 | 0.000  | -0.001 | 0.000  | 0.000  | -0.027 | -0.069 |

### C3 O DKH

Alpha MO: 1 2 3 4 5 6 7 8 9 10  
Energy(eV): -8886.6 -8886.5 -1081.6 -1081.4 -933.31 -933.30 -933.22 -933.18 -932.69 -932.58  
Symmetry: A A A A A A A A A A

FRAG# 1: 100.00 100.00 99.94 99.91 100.00 100.00 100.00 100.00 100.00 100.00  
Net pop.(%) 100.00 100.00 99.92 99.89 100.00 100.00 100.00 100.00 100.00 100.00

FRAG# 2: 0.00 0.00 0.01 0.02 0.00 0.00 0.00 0.00 0.00 0.00

FRAG# 3: 0.00 0.00 0.05 0.07 0.00 0.00 0.00 0.00 0.00 0.00  
Net pop.(%) 0.00 0.00 0.04 0.06 0.00 0.00 0.00 0.00 0.00 0.00

OP( 1 & 2 ) 0.000 0.000 0.000 0.000 0.000 0.000 0.000 0.000 0.000 0.000  
OP( 1 & 3 ) 0.000 0.000 0.000 0.000 0.000 0.000 0.000 0.000 0.000 0.000  
OP( 2 & 3 ) 0.000 0.000 0.000 0.000 0.000 0.000 0.000 0.000 0.000 0.000

Alpha MO: 11 12 13 14 15 16 17 18 19 20  
Energy(eV): -524.25 -524.20 -395.82 -395.71 -395.19 -395.10 -395.05 -394.87 -394.84 -394.80  
Symmetry: A A A A A A A A A A

FRAG# 1: 0.03 0.02 0.00 0.00 0.00 0.00 0.01 0.01 0.01 0.01

FRAG# 2: 99.97 99.98 0.00 0.00 0.00 0.00 0.00 0.00 0.00 0.00  
Net pop.(%) 99.94 99.95 0.00 0.00 0.00 0.00 0.00 0.00 0.00 0.00

FRAG# 3: 0.00 0.00 100.00 100.00 100.00 100.00 99.99 99.99 99.98 99.99  
Net pop.(%) 0.00 0.00 100.01 100.00 100.00 99.99 99.98 99.99 99.97 99.99

OP( 1 & 2 ) 0.001 0.000 0.000 0.000 0.000 0.000 0.000 0.000 0.000 0.000  
OP( 1 & 3 ) 0.000 0.000 0.000 0.000 0.000 0.000 0.000 0.000 0.000 0.000  
OP( 2 & 3 ) 0.000 0.000 0.000 0.000 0.000 0.000 0.000 0.000 0.000 0.000

Alpha MO: 21 22 23 24 25 26 27 28 29 30  
Energy(eV): -393.44 -393.34 -283.87 -283.73 -282.70 -282.54 -282.22 -282.00 -281.75 -281.68  
Symmetry: A A A A A A A A A A

FRAG# 1: 0.00 -0.01 0.00 0.00 -0.02 -0.02 -0.01 -0.01 -0.01 0.00

FRAG# 2: 0.00 0.00 0.00 0.00 0.00 0.00 0.00 0.00 0.00 0.00

FRAG# 3: 100.00 100.01 100.00 100.00 100.02 100.02 100.01 100.01 100.01 100.01  
Net pop.(%) 100.00 100.01 100.00 100.00 100.04 100.05 100.02 100.02 100.01 100.01

OP( 1 & 2 ) 0.000 0.000 0.000 0.000 0.000 0.000 0.000 0.000 0.000 0.000  
OP( 1 & 3 ) 0.000 0.000 0.000 0.000 0.000 0.000 0.000 0.000 0.000 0.000  
OP( 2 & 3 ) 0.000 0.000 0.000 0.000 0.000 0.000 0.000 0.000 0.000 0.000

Alpha MO: 31 32 33 34 35 36 37 38 39 40  
Energy(eV): -281.57 -281.56 -281.53 -281.44 -281.38 -281.30 -281.25 -281.20 -281.10 -281.09  
Symmetry: A A A A A A A A A A

FRAG# 1: -0.01 -0.01 0.00 -0.01 0.00 0.00 -0.01 0.00 0.00 0.00

FRAG# 2: 0.00 0.00 0.00 0.00 0.00 0.00 0.00 0.00 0.00 0.00

FRAG# 3: 100.01 100.01 100.00 100.01 100.00 100.00 100.01 100.00 100.00 100.00  
Net pop.(%) 100.02 100.03 100.01 100.02 100.01 100.01 100.02 100.01 100.01 100.01

OP( 1 & 2 ) 0.000 0.000 0.000 0.000 0.000 0.000 0.000 0.000 0.000 0.000  
OP( 1 & 3 ) 0.000 0.000 0.000 0.000 0.000 0.000 0.000 0.000 0.000 0.000  
OP( 2 & 3 ) 0.000 0.000 0.000 0.000 0.000 0.000 0.000 0.000 0.000 0.000

Alpha MO: 41 42 43 44 45 46 47 48 49 50  
Energy(eV): -280.82 -280.67 -280.53 -280.51 -280.32 -280.28 -280.26 -280.05 -279.86 -279.72  
Symmetry: A A A A A A A A A A

FRAG# 1: -0.01 -0.01 0.01 0.01 0.00 0.00 0.00 0.00 0.00 0.00

FRAG# 2: 0.00 0.00 0.00 0.00 0.00 0.00 0.00 0.00 0.00 0.00

FRAG# 3: 100.01 100.01 99.99 99.99 100.00 100.00 100.00 100.00 100.00 100.00  
Net pop.(%) 100.01 100.02 99.99 99.99 100.00 99.99 100.00 100.00 100.00 100.00

OP( 1 & 2 ) 0.000 0.000 0.000 0.000 0.000 0.000 0.000 0.000 0.000 0.000  
OP( 1 & 3 ) 0.000 0.000 0.000 0.000 0.000 0.000 0.000 0.000 0.000 0.000  
OP( 2 & 3 ) 0.000 0.000 0.000 0.000 0.000 0.000 0.000 0.000 0.000 0.000

Alpha MO: 51 52 53 54 55 56 57 58 59 60  
Energy(eV): -279.42 -279.42 -279.38 -279.37 -279.37 -279.28 -279.28 -279.26 -279.18 -279.12  
Symmetry: A A A A A A A A A A

FRAG# 1: 0.00 0.00 0.01 0.01 0.00 0.00 0.00 0.00 0.01 0.00

FRAG# 2: 0.00 0.00 0.00 0.00 0.00 0.00 0.00 0.00 0.00 0.00

FRAG# 3: 100.00 100.00 99.99 99.99 100.00 100.00 100.00 100.00 99.99 100.00  
Net pop.(%) 99.99 100.00 99.99 99.99 100.00 100.00 100.00 100.00 99.99 100.00

OP( 1 & 2 ) 0.000 0.000 0.000 0.000 0.000 0.000 0.000 0.000 0.000 0.000  
OP( 1 & 3 ) 0.000 0.000 0.000 0.000 0.000 0.000 0.000 0.000 0.000 0.000  
OP( 2 & 3 ) 0.000 0.000 0.000 0.000 0.000 0.000 0.000 0.000 0.000 0.000

Alpha MO: 61 62 63 64 65 66 67 68 69 70  
Energy(eV): -279.03 -278.92 -127.57 -127.47 -84.07 -84.04 -83.99 -83.92 -83.06 -82.95  
Symmetry: A A A A A A A A A A

FRAG# 1: 0.00 0.00 100.21 100.12 99.86 99.94 99.85 99.92 99.90 99.84  
Net pop.(%) 0.00 0.00 100.42 100.25 99.75 99.88 99.71 99.86 99.83 99.73

FRAG# 2: 0.00 0.00 -0.06 -0.05 0.04 0.08 0.07 0.05 0.01 0.01

FRAG# 3: 100.00 100.00 -0.15 -0.08 0.09 -0.01 0.08 0.03 0.09 0.14  
Net pop.(%) 100.00 100.00 0.00 0.00 0.02 0.01 0.02 0.01 0.03 0.04

OP( 1 & 2 ) 0.000 0.000 -0.001 -0.001 0.001 0.001 0.001 0.001 0.000 0.000  
OP( 1 & 3 ) 0.000 0.000 -0.003 -0.002 0.001 0.000 0.001 0.000 0.001 0.002  
OP( 2 & 3 ) 0.000 0.000 0.000 0.000 0.000 0.000 0.000 0.000 0.000 0.000

Alpha MO: 71 72 73 74 75 76 77 78 79 80  
Energy(eV): -33.95 -33.86 -32.94 -32.85 -31.71 -31.54 -30.33 -29.00 -28.94 -28.87  
Symmetry: A A A A A A A A A A

FRAG# 1: -0.83 -0.89 -0.27 -0.36 -0.91 -0.70 4.62 -0.12 3.05 -0.31  
Net pop.(%) 0.06 0.05 0.02 0.04 0.21 0.16 2.45 0.15 1.64 0.10

FRAG# 2: 0.01 0.01 0.00 0.00 0.77 0.70 91.93 3.25 90.77 1.79  
Net pop.(%) 0.01 0.01 0.00 0.00 0.62 0.58 88.47 3.20 88.66 1.81

FRAG# 3: 100.82 100.87 100.27 100.36 100.14 100.00 3.45 96.86 6.18 98.51  
Net pop.(%) 101.71 101.81 100.56 100.75 101.07 100.75 3.50 97.27 5.44 98.99

OP( 1 & 2 ) 0.000 0.000 0.000 0.000 0.000 0.000 0.057 0.002 0.028 0.001  
OP( 1 & 3 ) -0.018 -0.019 -0.006 -0.008 -0.022 -0.017 -0.013 -0.007 0.000 -0.009  
OP( 2 & 3 ) 0.000 0.000 0.000 0.000 0.003 0.002 0.012 -0.001 0.014 -0.001

Alpha MO: 81 82 83 84 85 86 87 88 89 90  
Energy(eV): -27.46 -27.34 -27.29 -27.15 -26.76 -26.61 -26.47 -26.45 -25.98 -25.91  
Symmetry: A A A A A A A A A A

FRAG# 1: 0.12 -0.08 0.31 0.22 0.01 0.12 0.10 0.05 -0.18 0.02  
Net pop.(%) 0.05 0.04 0.14 0.11 0.07 0.08 0.10 0.07 0.03 0.02

FRAG# 2: 0.07 0.14 0.15 0.12 0.13 0.10 0.06 0.10 0.07 0.01  
Net pop.(%) 0.08 0.17 0.19 0.15 0.14 0.12 0.08 0.13 0.09 0.01

FRAG# 3: 99.81 99.94 99.55 99.65 99.86 99.78 99.84 99.85 100.11 99.97  
Net pop.(%) 99.75 100.08 99.39 99.57 99.93 99.74 99.83 99.87 100.34 99.95

OP( 1 & 2 ) 0.000 0.000 0.000 0.000 0.000 0.000 0.000 0.000 0.000 0.000  
OP( 1 & 3 ) 0.001 -0.002 0.004 0.002 -0.001 0.001 0.000 0.000 -0.004 0.000  
OP( 2 & 3 ) 0.000 0.000 -0.001 -0.001 0.000 0.000 0.000 0.000 0.000 0.000

Alpha MO: 91 92 93 94 95 96 97 98 99 100  
Energy(eV): -25.84 -25.75 -25.39 -25.29 -23.83 -23.70 -22.92 -22.78 -22.73 -22.68  
Symmetry: A A A A A A A A A A

FRAG# 1: -0.03 0.07 0.04 0.04 -0.01 0.00 0.76 0.79 -0.19 0.12  
Net pop.(%) 0.03 0.01 0.02 0.02 0.04 0.03 0.29 0.26 0.02 0.02

FRAG# 2: 0.06 0.01 0.01 0.02 0.01 0.01 0.16 0.19 0.05 0.02  
Net pop.(%) 0.08 0.01 0.01 0.02 0.01 0.01 0.13 0.15 0.02 0.01

FRAG# 3: 99.96 99.92 99.95 99.93 100.01 99.99 99.08 99.01 100.14 99.86  
Net pop.(%) 100.03 99.86 99.93 99.90 100.06 100.03 98.58 98.46 100.34 99.76

OP( 1 & 2 ) 0.000 0.000 0.000 0.000 0.000 0.000 0.000 0.000 0.000 0.000  
OP( 1 & 3 ) -0.001 0.001 0.000 0.001 -0.001 -0.001 0.009 0.010 -0.004 0.002  
OP( 2 & 3 ) 0.000 0.000 0.000 0.000 0.000 0.000 0.001 0.001 0.001 0.000

Alpha MO: 101 102 103 104 105 106 107 108 109 110  
Energy(eV): -22.64 -22.61 -22.55 -22.51 -22.40 -22.30 -22.24 -22.17 -21.54 -21.45  
Symmetry: A A A A A A A A A A

FRAG# 1: -0.05 0.00 0.07 0.06 0.00 0.34 0.03 0.33 0.30 0.26  
Net pop.(%) 0.02 0.03 0.02 0.02 0.01 0.26 0.01 0.25 0.12 0.09

FRAG# 2: 0.15 0.09 0.11 0.01 0.04 0.07 0.01 0.06 0.07 0.07  
Net pop.(%) 0.16 0.05 0.13 0.00 0.03 0.08 0.00 0.06 0.08 0.07

FRAG# 3: 99.90 99.91 99.82 99.92 99.96 99.60 99.96 99.61 99.62 99.68  
Net pop.(%) 99.96 99.91 99.76 99.88 99.96 99.54 99.94 99.54 99.42 99.49

OP( 1 & 2 ) 0.000 0.000 0.000 0.000 0.000 0.000 0.000 0.000 0.000 0.000  
OP( 1 & 3 ) -0.001 -0.001 0.001 0.001 0.000 0.001 0.000 0.002 0.004 0.004  
OP( 2 & 3 ) 0.000 0.001 0.000 0.000 0.000 0.000 0.000 0.000 0.000 0.000

Alpha MO: 111 112 113 114 115 116 117 118 119 120  
Energy(eV): -21.27 -21.15 -20.82 -20.73 -20.56 -20.43 -19.99 -19.92 -19.66 -19.50  
Symmetry: A A A A A A A A A A

FRAG# 1: 0.10 0.10 0.07 0.18 1.40 1.05 2.60 2.16 1.85 1.29  
Net pop.(%) 0.06 0.07 0.05 0.08 0.67 0.55 1.61 1.31 0.89 0.62

FRAG# 2: 0.02 0.01 0.01 0.06 0.41 0.38 0.18 0.17 0.38 0.26  
Net pop.(%) 0.02 0.01 0.01 0.05 0.42 0.42 0.10 0.08 0.26 0.25

FRAG# 3: 99.88 99.89 99.92 99.76 98.20 98.57 97.22 97.68 97.78 98.45  
Net pop.(%) 99.85 99.86 99.91 99.66 97.50 98.09 96.13 96.75 96.80 97.70

OP( 1 & 2 ) 0.000 0.000 0.000 0.000 0.000 0.000 0.000 0.000 0.001 -0.001  
OP( 1 & 3 ) 0.001 0.001 0.000 0.002 0.014 0.010 0.020 0.017 0.018 0.014  
OP( 2 & 3 ) 0.000 0.000 0.000 0.000 0.000 -0.001 0.002 0.002 0.001 0.001

Alpha MO: 121 122 123 124 125 126 127 128 129 130  
Energy(eV): -19.32 -19.21 -18.88 -18.80 -18.58 -18.43 -18.42 -18.27 -17.81 -17.65  
Symmetry: A A A A A A A A A A

=====

|             |      |      |      |      |      |      |      |      |      |      |
|-------------|------|------|------|------|------|------|------|------|------|------|
| FRAG# 1:    | 0.35 | 0.36 | 0.38 | 0.27 | 0.29 | 1.30 | 0.32 | 1.26 | 4.53 | 2.14 |
| Net pop.(%) | 0.16 | 0.18 | 0.30 | 0.24 | 0.19 | 0.93 | 0.25 | 0.90 | 3.91 | 1.58 |

-----

|             |      |      |      |      |      |      |      |      |      |      |
|-------------|------|------|------|------|------|------|------|------|------|------|
| FRAG# 2:    | 0.02 | 0.02 | 0.19 | 0.20 | 0.11 | 0.44 | 0.18 | 0.39 | 4.97 | 2.36 |
| Net pop.(%) | 0.02 | 0.01 | 0.14 | 0.17 | 0.09 | 0.30 | 0.14 | 0.27 | 3.66 | 1.69 |

-----

|             |       |       |       |       |       |       |       |       |       |       |
|-------------|-------|-------|-------|-------|-------|-------|-------|-------|-------|-------|
| FRAG# 3:    | 99.62 | 99.62 | 99.43 | 99.53 | 99.60 | 98.26 | 99.50 | 98.35 | 90.50 | 95.50 |
| Net pop.(%) | 99.42 | 99.43 | 99.34 | 99.46 | 99.47 | 97.95 | 99.41 | 98.03 | 89.69 | 94.73 |

-----

|             |       |       |       |       |       |       |       |       |       |       |
|-------------|-------|-------|-------|-------|-------|-------|-------|-------|-------|-------|
| OP( 1 & 2 ) | 0.000 | 0.000 | 0.000 | 0.000 | 0.000 | 0.002 | 0.000 | 0.002 | 0.011 | 0.005 |
| OP( 1 & 3 ) | 0.004 | 0.004 | 0.001 | 0.001 | 0.002 | 0.006 | 0.001 | 0.005 | 0.001 | 0.007 |
| OP( 2 & 3 ) | 0.000 | 0.000 | 0.001 | 0.001 | 0.001 | 0.001 | 0.001 | 0.001 | 0.015 | 0.009 |

Alpha MO: 131 132 133 134 135 136 137 138 139 140  
Energy(eV): -17.45 -17.43 -17.24 -17.20 -17.15 -17.07 -17.02 -16.93 -16.84 -16.76  
Symmetry: A A A A A A A A A A

=====

|             |      |      |      |      |      |      |      |       |       |      |
|-------------|------|------|------|------|------|------|------|-------|-------|------|
| FRAG# 1:    | 2.48 | 5.65 | 7.50 | 5.81 | 8.36 | 3.16 | 6.22 | 12.46 | 11.24 | 8.27 |
| Net pop.(%) | 1.61 | 3.82 | 5.63 | 4.02 | 7.07 | 2.47 | 5.20 | 10.62 | 9.70  | 6.75 |

-----

|             |      |      |      |      |      |      |      |      |      |      |
|-------------|------|------|------|------|------|------|------|------|------|------|
| FRAG# 2:    | 1.32 | 4.62 | 4.21 | 3.28 | 1.97 | 0.72 | 1.79 | 8.68 | 4.83 | 2.52 |
| Net pop.(%) | 1.08 | 3.36 | 3.14 | 2.46 | 1.68 | 0.64 | 1.51 | 7.19 | 4.17 | 2.21 |

-----

|             |       |       |       |       |       |       |       |       |       |       |
|-------------|-------|-------|-------|-------|-------|-------|-------|-------|-------|-------|
| FRAG# 3:    | 96.19 | 89.73 | 88.30 | 90.91 | 89.67 | 96.11 | 91.98 | 78.86 | 83.93 | 89.20 |
| Net pop.(%) | 95.46 | 88.47 | 87.03 | 89.59 | 88.88 | 95.57 | 91.35 | 77.63 | 83.19 | 87.66 |

-----

|             |       |       |       |       |        |        |        |       |        |       |
|-------------|-------|-------|-------|-------|--------|--------|--------|-------|--------|-------|
| OP( 1 & 2 ) | 0.004 | 0.018 | 0.017 | 0.013 | 0.008  | 0.002  | 0.007  | 0.021 | 0.015  | 0.003 |
| OP( 1 & 3 ) | 0.014 | 0.018 | 0.021 | 0.023 | 0.018  | 0.012  | 0.014  | 0.016 | 0.016  | 0.027 |
| OP( 2 & 3 ) | 0.001 | 0.007 | 0.005 | 0.003 | -0.002 | -0.001 | -0.001 | 0.009 | -0.001 | 0.003 |

Alpha MO: 141 142 143 144 145 146 147 148 149 150  
HOMO-77 HOMO-76 HOMO-75 HOMO-74 HOMO-73 HOMO-72 HOMO-71 HOMO-70 HOMO-69 HOMO-68  
Energy(eV): -16.68 -16.65 -16.59 -16.52 -16.45 -16.41 -16.32 -16.26 -16.24 -16.07  
Symmetry: A A A A A A A A A A

=====

|             |      |       |      |      |      |      |       |      |      |      |
|-------------|------|-------|------|------|------|------|-------|------|------|------|
| FRAG# 1:    | 3.10 | 12.68 | 6.32 | 4.82 | 5.13 | 5.03 | 18.13 | 6.21 | 3.55 | 7.54 |
| Net pop.(%) | 2.76 | 10.63 | 5.06 | 4.20 | 4.12 | 4.37 | 16.41 | 5.34 | 2.80 | 6.44 |

-----

|             |      |      |      |      |      |      |       |      |      |      |
|-------------|------|------|------|------|------|------|-------|------|------|------|
| FRAG# 2:    | 3.94 | 9.86 | 8.45 | 5.29 | 1.83 | 3.69 | 15.25 | 4.65 | 2.68 | 5.26 |
| Net pop.(%) | 3.12 | 8.42 | 6.83 | 4.77 | 1.67 | 3.16 | 13.38 | 4.19 | 1.99 | 4.34 |

-----

|             |       |       |       |       |       |       |       |       |       |       |
|-------------|-------|-------|-------|-------|-------|-------|-------|-------|-------|-------|
| FRAG# 3:    | 92.96 | 77.47 | 85.23 | 89.89 | 93.04 | 91.29 | 66.62 | 89.14 | 93.78 | 87.21 |
| Net pop.(%) | 92.47 | 76.23 | 83.82 | 89.77 | 92.22 | 91.14 | 67.33 | 89.17 | 93.14 | 86.55 |

-----

|             |       |       |       |       |       |       |        |        |       |       |
|-------------|-------|-------|-------|-------|-------|-------|--------|--------|-------|-------|
| OP( 1 & 2 ) | 0.007 | 0.022 | 0.015 | 0.010 | 0.003 | 0.010 | 0.043  | 0.014  | 0.008 | 0.013 |
| OP( 1 & 3 ) | 0.000 | 0.019 | 0.010 | 0.002 | 0.017 | 0.003 | -0.009 | 0.004  | 0.007 | 0.008 |
| OP( 2 & 3 ) | 0.010 | 0.006 | 0.018 | 0.000 | 0.000 | 0.000 | -0.006 | -0.004 | 0.006 | 0.005 |

Alpha MO: 151 152 153 154 155 156 157 158 159 160  
HOMO-67 HOMO-66 HOMO-65 HOMO-64 HOMO-63 HOMO-62 HOMO-61 HOMO-60 HOMO-59 HOMO-58  
Energy(eV): -16.04 -15.98 -15.96 -15.91 -15.88 -15.79 -15.76 -15.69 -15.66 -15.53  
Symmetry: A A A A A A A A A A

FRAG# 1: 3.14 4.38 4.27 6.16 3.07 1.76 6.69 2.34 2.52 8.78  
Net pop.(%) 2.75 4.02 3.71 5.18 2.55 1.51 5.84 2.10 2.33 8.56

FRAG# 2: 2.26 2.44 1.45 3.05 1.20 1.27 4.38 1.77 2.06 1.82  
Net pop.(%) 2.04 2.20 1.25 2.51 1.07 1.14 3.53 1.45 1.60 2.05

FRAG# 3: 94.60 93.18 94.27 90.80 95.73 96.97 88.93 95.89 95.41 89.40  
Net pop.(%) 94.52 93.26 94.00 90.12 95.40 96.94 88.41 95.68 95.20 90.08

OP( 1 & 2 ) 0.005 0.007 0.005 0.008 0.003 0.003 0.012 0.004 0.004 0.007  
OP( 1 & 3 ) 0.002 0.000 0.006 0.011 0.007 0.001 0.005 0.001 -0.001 -0.002  
OP( 2 & 3 ) -0.001 -0.002 -0.001 0.002 -0.001 -0.001 0.005 0.003 0.005 -0.011

Alpha MO: 161 162 163 164 165 166 167 168 169 170  
HOMO-57 HOMO-56 HOMO-55 HOMO-54 HOMO-53 HOMO-52 HOMO-51 HOMO-50 HOMO-49 HOMO-48  
Energy(eV): -15.50 -15.42 -15.35 -15.28 -15.23 -15.16 -15.13 -15.10 -14.82 -14.70  
Symmetry: A A A A A A A A A A

FRAG# 1: 7.01 4.44 18.93 15.38 14.28 3.41 9.00 26.71 32.53 41.62  
Net pop.(%) 6.28 4.18 16.52 14.28 12.73 3.05 8.47 25.69 31.53 41.46

FRAG# 2: 3.97 2.04 9.87 7.34 5.50 1.38 3.40 10.14 8.15 2.72  
Net pop.(%) 3.36 1.78 8.84 6.18 4.73 1.18 3.18 9.78 6.83 2.46

FRAG# 3: 89.03 93.52 71.20 77.28 80.22 95.21 87.60 63.15 59.32 55.65  
Net pop.(%) 88.85 93.67 69.76 77.31 79.50 95.05 87.55 65.51 58.66 55.68

OP( 1 & 2 ) 0.012 0.007 0.020 0.023 0.016 0.004 0.007 0.037 0.017 0.004  
OP( 1 & 3 ) 0.003 -0.002 0.028 -0.001 0.015 0.003 0.004 -0.017 0.003 -0.001  
OP( 2 & 3 ) 0.001 -0.001 0.001 0.000 0.000 0.000 -0.003 -0.030 0.010 0.001

Alpha MO: 171 172 173 174 175 176 177 178 179 180  
HOMO-47 HOMO-46 HOMO-45 HOMO-44 HOMO-43 HOMO-42 HOMO-41 HOMO-40 HOMO-39 HOMO-38  
Energy(eV): -14.65 -14.64 -14.53 -14.41 -14.30 -14.29 -14.24 -14.23 -14.21 -14.19  
Symmetry: A A A A A A A A A A

FRAG# 1: 20.86 26.57 22.46 18.53 16.31 53.75 2.23 6.53 27.45 64.73  
Net pop.(%) 20.05 26.32 21.88 17.37 15.84 52.44 2.09 6.23 26.27 64.24

FRAG# 2: 3.51 3.19 3.36 7.57 4.71 1.87 0.22 1.41 3.91 1.26  
Net pop.(%) 3.04 2.93 2.91 6.92 4.50 1.88 0.22 1.29 4.48 1.15

FRAG# 3: 75.63 70.24 74.19 73.91 78.98 44.38 97.55 92.07 68.64 34.02  
Net pop.(%) 75.76 70.50 74.50 72.54 78.76 43.15 97.40 91.76 68.11 33.68

OP( 1 & 2 ) 0.014 0.008 0.013 0.004 0.005 0.001 0.000 0.001 0.001 0.002  
OP( 1 & 3 ) 0.002 -0.003 -0.002 0.019 0.005 0.026 0.003 0.005 0.023 0.007  
OP( 2 & 3 ) -0.005 -0.002 -0.005 0.009 0.000 -0.001 0.000 0.001 -0.012 0.000



Alpha MO: 181 182 183 184 185 186 187 188 189 190  
HOMO-37 HOMO-36 HOMO-35 HOMO-34 HOMO-33 HOMO-32 HOMO-31 HOMO-30 HOMO-29 HOMO-28  
Energy(eV): -14.15 -14.08 -13.99 -13.97 -13.88 -13.80 -13.75 -13.61 -13.53 -13.44  
Symmetry: A A A A A A A A A A

=====

|             |       |       |      |      |       |       |       |      |      |      |
|-------------|-------|-------|------|------|-------|-------|-------|------|------|------|
| FRAG# 1:    | 16.73 | 31.87 | 3.46 | 7.16 | 13.77 | 13.62 | 13.86 | 7.42 | 4.58 | 4.93 |
| Net pop.(%) | 15.94 | 30.74 | 3.04 | 6.91 | 13.14 | 13.25 | 12.54 | 7.28 | 4.40 | 4.98 |

-----

|             |      |      |      |      |      |      |       |      |      |      |
|-------------|------|------|------|------|------|------|-------|------|------|------|
| FRAG# 2:    | 4.90 | 0.92 | 0.98 | 0.90 | 5.05 | 1.82 | 11.08 | 1.71 | 2.48 | 1.18 |
| Net pop.(%) | 5.46 | 0.90 | 0.82 | 0.75 | 4.86 | 1.78 | 10.66 | 1.65 | 2.34 | 1.23 |

-----

|             |       |       |       |       |       |       |       |       |       |       |
|-------------|-------|-------|-------|-------|-------|-------|-------|-------|-------|-------|
| FRAG# 3:    | 78.37 | 67.21 | 95.56 | 91.94 | 81.19 | 84.55 | 75.06 | 90.87 | 92.94 | 93.89 |
| Net pop.(%) | 78.18 | 66.06 | 94.96 | 91.47 | 80.50 | 84.16 | 74.81 | 90.82 | 92.75 | 93.93 |

-----

|             |        |       |       |        |       |       |        |       |       |        |
|-------------|--------|-------|-------|--------|-------|-------|--------|-------|-------|--------|
| OP( 1 & 2 ) | 0.000  | 0.000 | 0.000 | -0.001 | 0.001 | 0.000 | 0.015  | 0.002 | 0.001 | -0.001 |
| OP( 1 & 3 ) | 0.016  | 0.023 | 0.009 | 0.006  | 0.011 | 0.007 | 0.011  | 0.001 | 0.002 | 0.000  |
| OP( 2 & 3 ) | -0.012 | 0.000 | 0.003 | 0.004  | 0.003 | 0.001 | -0.007 | 0.000 | 0.002 | 0.000  |

Alpha MO: 191 192 193 194 195 196 197 198 199 200  
HOMO-27 HOMO-26 HOMO-25 HOMO-24 HOMO-23 HOMO-22 HOMO-21 HOMO-20 HOMO-19 HOMO-18  
Energy(eV): -13.36 -13.32 -13.29 -13.22 -13.20 -13.14 -13.08 -13.01 -12.99 -12.87  
Symmetry: A A A A A A A A A A

=====

|             |      |      |      |      |      |       |      |      |      |      |
|-------------|------|------|------|------|------|-------|------|------|------|------|
| FRAG# 1:    | 6.99 | 8.35 | 5.91 | 9.46 | 1.63 | 22.35 | 8.24 | 7.18 | 1.61 | 5.76 |
| Net pop.(%) | 7.37 | 8.57 | 5.98 | 9.51 | 1.63 | 23.21 | 8.34 | 7.39 | 1.62 | 6.04 |

-----

|             |      |      |      |      |      |       |      |      |      |      |
|-------------|------|------|------|------|------|-------|------|------|------|------|
| FRAG# 2:    | 2.60 | 2.30 | 4.42 | 6.89 | 0.96 | 11.90 | 4.94 | 4.60 | 0.65 | 2.22 |
| Net pop.(%) | 2.68 | 2.35 | 4.59 | 7.22 | 1.04 | 12.29 | 5.08 | 4.55 | 0.64 | 2.16 |

-----

|             |       |       |       |       |       |       |       |       |       |       |
|-------------|-------|-------|-------|-------|-------|-------|-------|-------|-------|-------|
| FRAG# 3:    | 90.41 | 89.35 | 89.66 | 83.65 | 97.41 | 65.75 | 86.82 | 88.22 | 97.74 | 92.02 |
| Net pop.(%) | 91.41 | 89.76 | 90.10 | 85.17 | 97.57 | 65.69 | 86.81 | 88.00 | 97.65 | 92.42 |

-----

|             |        |        |        |        |        |        |        |        |        |        |
|-------------|--------|--------|--------|--------|--------|--------|--------|--------|--------|--------|
| OP( 1 & 2 ) | 0.005  | 0.001  | 0.002  | 0.011  | 0.001  | -0.013 | -0.003 | -0.004 | -0.001 | 0.002  |
| OP( 1 & 3 ) | -0.013 | -0.006 | -0.003 | -0.012 | -0.001 | -0.004 | 0.000  | 0.000  | 0.001  | -0.008 |
| OP( 2 & 3 ) | -0.007 | -0.002 | -0.005 | -0.018 | -0.002 | 0.005  | 0.000  | 0.005  | 0.001  | -0.001 |

Alpha MO: 201 202 203 204 205 206 207 208 209 210  
HOMO-17 HOMO-16 HOMO-15 HOMO-14 HOMO-13 HOMO-12 HOMO-11 HOMO-10 HOMO-9 HOMO-8  
Energy(eV): -12.84 -12.79 -12.71 -12.66 -12.54 -12.48 -12.39 -12.29 -12.02 -11.95  
Symmetry: A A A A A A A A A A

=====

|             |      |      |      |      |       |       |       |       |      |       |
|-------------|------|------|------|------|-------|-------|-------|-------|------|-------|
| FRAG# 1:    | 2.93 | 7.13 | 4.63 | 3.52 | 16.92 | 16.14 | 14.58 | 21.32 | 6.45 | 12.82 |
| Net pop.(%) | 3.15 | 7.35 | 4.90 | 3.56 | 17.96 | 16.58 | 15.07 | 22.01 | 7.35 | 14.17 |

-----

|             |      |      |      |      |       |       |       |       |      |      |
|-------------|------|------|------|------|-------|-------|-------|-------|------|------|
| FRAG# 2:    | 1.04 | 4.72 | 3.35 | 2.88 | 19.66 | 16.33 | 17.04 | 9.29  | 1.87 | 2.38 |
| Net pop.(%) | 1.41 | 5.03 | 3.46 | 3.00 | 21.36 | 17.95 | 18.39 | 10.03 | 1.94 | 2.30 |

-----

|             |       |       |       |       |       |       |       |       |       |       |
|-------------|-------|-------|-------|-------|-------|-------|-------|-------|-------|-------|
| FRAG# 3:    | 96.02 | 88.14 | 92.02 | 93.60 | 63.43 | 67.54 | 68.38 | 69.39 | 91.68 | 84.80 |
| Net pop.(%) | 96.42 | 88.44 | 92.51 | 93.78 | 65.49 | 69.82 | 70.31 | 70.50 | 92.67 | 86.35 |

-----

|             |        |        |        |        |        |        |        |        |        |        |
|-------------|--------|--------|--------|--------|--------|--------|--------|--------|--------|--------|
| OP( 1 & 2 ) | -0.002 | -0.002 | 0.001  | 0.000  | -0.007 | 0.002  | 0.001  | -0.003 | 0.000  | 0.003  |
| OP( 1 & 3 ) | -0.002 | -0.002 | -0.006 | -0.001 | -0.014 | -0.011 | -0.011 | -0.011 | -0.018 | -0.030 |
| OP( 2 & 3 ) | -0.005 | -0.004 | -0.003 | -0.003 | -0.027 | -0.035 | -0.028 | -0.011 | -0.002 | -0.001 |

Alpha MO: 211 212 213 214 215 216 217 218 219 220  
HOMO-7 HOMO-6 HOMO-5 HOMO-4 HOMO-3 HOMO-2 HOMO-1 HOMO LUMO LUMO+1  
Energy(eV): -11.88 -11.84 -11.71 -11.53 -11.41 -11.30 -11.28 -11.14 -9.12 -8.83  
Symmetry: A A A A A A A A A A

=====

|             |      |      |       |       |      |      |      |      |       |       |
|-------------|------|------|-------|-------|------|------|------|------|-------|-------|
| FRAG# 1:    | 0.32 | 2.36 | 28.45 | 18.46 | 0.40 | 0.94 | 0.17 | 0.03 | 33.11 | 43.22 |
| Net pop.(%) | 0.52 | 2.73 | 33.09 | 21.89 | 0.46 | 1.04 | 0.30 | 0.10 | 44.77 | 55.50 |

-----

|             |      |      |       |       |      |      |      |      |       |       |
|-------------|------|------|-------|-------|------|------|------|------|-------|-------|
| FRAG# 2:    | 0.47 | 2.70 | 36.09 | 71.93 | 0.18 | 0.52 | 0.20 | 0.12 | 52.73 | 35.57 |
| Net pop.(%) | 0.49 | 2.85 | 39.90 | 76.37 | 0.20 | 0.57 | 0.22 | 0.13 | 62.08 | 44.42 |

-----

|             |       |       |       |       |       |       |       |       |       |       |
|-------------|-------|-------|-------|-------|-------|-------|-------|-------|-------|-------|
| FRAG# 3:    | 99.21 | 94.94 | 35.46 | 9.61  | 99.42 | 98.55 | 99.63 | 99.85 | 14.17 | 21.21 |
| Net pop.(%) | 99.37 | 95.36 | 38.39 | 11.12 | 99.50 | 98.68 | 99.75 | 99.92 | 19.14 | 31.57 |

-----

|             |        |        |        |        |        |        |        |        |        |        |
|-------------|--------|--------|--------|--------|--------|--------|--------|--------|--------|--------|
| OP( 1 & 2 ) | -0.001 | -0.001 | -0.055 | -0.064 | 0.000  | 0.000  | 0.000  | 0.000  | -0.160 | -0.108 |
| OP( 1 & 3 ) | -0.003 | -0.006 | -0.038 | -0.005 | -0.001 | -0.002 | -0.002 | -0.001 | -0.073 | -0.138 |
| OP( 2 & 3 ) | 0.000  | -0.002 | -0.021 | -0.025 | 0.000  | -0.001 | 0.000  | 0.000  | -0.027 | -0.069 |

### C3 P non-relativistic

Alpha MO: 1 2 3 4 5 6 7 8 9 10  
Energy(eV): -8789.2 -8789.0 -1058.0 -1057.8 -927.00 -926.70 -926.63 -926.59 -926.34 -926.34  
Symmetry: A A A A A A A A A A

=====

FRAG# 1: 100.00 100.00 99.93 99.96 100.00 100.00 100.00 100.00 100.00 100.00  
Net pop.(%) 100.00 100.00 99.93 99.96 100.00 100.00 100.00 100.00 100.00 100.00

-----

FRAG# 2: 0.00 0.00 0.01 0.01 0.00 0.00 0.00 0.00 0.00 0.00

-----

FRAG# 3: 0.00 0.00 0.06 0.03 0.00 0.00 0.00 0.00 0.00 0.00  
Net pop.(%) 0.00 0.00 0.06 0.05 0.00 0.00 0.00 0.00 0.00 0.00

-----

OP( 1 & 2 ) 0.000 0.000 0.000 0.000 0.000 0.000 0.000 0.000 0.000 0.000  
OP( 1 & 3 ) 0.000 0.000 0.000 0.000 0.000 0.000 0.000 0.000 0.000 0.000  
OP( 2 & 3 ) 0.000 0.000 0.000 0.000 0.000 0.000 0.000 0.000 0.000 0.000

Alpha MO: 11 12 13 14 15 16 17 18 19 20  
Energy(eV): -525.05 -524.91 -395.49 -395.46 -395.42 -395.16 -394.32 -394.25 -394.16 -394.15  
Symmetry: A A A A A A A A A A

=====

FRAG# 1: 0.01 0.01 0.00 0.00 0.00 0.00 0.01 0.01 0.01 0.00

-----

FRAG# 2: 99.99 99.99 0.00 0.00 0.00 0.00 0.00 0.00 0.00 0.00  
Net pop.(%) 99.98 99.99 0.00 0.00 0.00 0.00 0.00 0.00 0.00 0.00

-----

FRAG# 3: 0.00 0.00 100.00 100.00 100.00 100.00 99.99 99.99 99.99 100.00  
Net pop.(%) 0.00 0.00 100.01 100.00 100.01 100.00 99.98 99.98 99.98 100.00

-----

OP( 1 & 2 ) 0.000 0.000 0.000 0.000 0.000 0.000 0.000 0.000 0.000 0.000  
OP( 1 & 3 ) 0.000 0.000 0.000 0.000 0.000 0.000 0.000 0.000 0.000 0.000  
OP( 2 & 3 ) 0.000 0.000 0.000 0.000 0.000 0.000 0.000 0.000 0.000 0.000

Alpha MO: 21 22 23 24 25 26 27 28 29 30  
Energy(eV): -393.71 -393.66 -283.72 -283.68 -282.29 -282.14 -281.88 -281.73 -281.53 -281.51  
Symmetry: A A A A A A A A A A

=====

FRAG# 1: 0.00 0.00 0.00 0.00 -0.02 -0.02 0.00 0.01 -0.01 -0.01

-----

FRAG# 2: 0.00 0.00 0.00 0.00 0.00 0.00 0.00 0.00 0.00 0.00

-----

FRAG# 3: 100.00 100.00 100.00 100.00 100.02 100.02 100.00 99.99 100.01 100.00  
Net pop.(%) 99.99 100.00 100.00 100.00 100.04 100.04 100.01 99.99 100.01 100.01

-----

OP( 1 & 2 ) 0.000 0.000 0.000 0.000 0.000 0.000 0.000 0.000 0.000 0.000  
OP( 1 & 3 ) 0.000 0.000 0.000 0.000 0.000 0.000 0.000 0.000 0.000 0.000  
OP( 2 & 3 ) 0.000 0.000 0.000 0.000 0.000 0.000 0.000 0.000 0.000 0.000

Alpha MO: 31 32 33 34 35 36 37 38 39 40  
Energy(eV): -281.46 -281.27 -281.26 -281.22 -281.21 -281.18 -281.13 -281.10 -281.03 -280.98  
Symmetry: A A A A A A A A A A

=====

FRAG# 1: 0.00 -0.01 -0.01 0.00 -0.01 -0.01 0.00 0.00 0.00 0.00

-----

FRAG# 2: 0.00 0.00 0.00 0.00 0.00 0.00 0.00 0.00 0.00 0.00

-----

FRAG# 3: 100.01 100.01 100.01 100.00 100.00 100.01 100.00 100.00 100.00 100.00  
Net pop.(%) 100.01 100.02 100.02 100.00 100.01 100.02 100.01 100.00 100.01 100.01

-----

OP( 1 & 2 ) 0.000 0.000 0.000 0.000 0.000 0.000 0.000 0.000 0.000 0.000  
OP( 1 & 3 ) 0.000 0.000 0.000 0.000 0.000 0.000 0.000 0.000 0.000 0.000  
OP( 2 & 3 ) 0.000 0.000 0.000 0.000 0.000 0.000 0.000 0.000 0.000 0.000

Alpha MO: 41 42 43 44 45 46 47 48 49 50  
Energy(eV): -280.87 -280.84 -280.37 -280.36 -280.25 -280.12 -280.11 -280.04 -280.01 -279.80  
Symmetry: A A A A A A A A A A

FRAG# 1: 0.00 -0.01 0.00 0.00 0.00 0.00 0.00 0.00 0.00 0.00

FRAG# 2: 0.00 0.00 0.00 0.00 0.00 0.00 0.00 0.00 0.00 0.00

FRAG# 3: 100.00 100.01 100.00 99.99 100.00 100.00 100.00 100.00 100.00 100.00  
Net pop.(%) 100.00 100.02 99.99 99.99 100.00 100.00 100.00 100.00 100.00 100.00

OP( 1 & 2 ) 0.000 0.000 0.000 0.000 0.000 0.000 0.000 0.000 0.000 0.000  
OP( 1 & 3 ) 0.000 0.000 0.000 0.000 0.000 0.000 0.000 0.000 0.000 0.000  
OP( 2 & 3 ) 0.000 0.000 0.000 0.000 0.000 0.000 0.000 0.000 0.000 0.000

Alpha MO: 51 52 53 54 55 56 57 58 59 60  
Energy(eV): -279.38 -279.38 -279.27 -279.22 -279.22 -279.16 -279.12 -279.11 -279.00 -279.00  
Symmetry: A A A A A A A A A A

FRAG# 1: 0.00 0.00 0.01 0.00 0.00 0.00 0.00 0.00 0.00 0.00

FRAG# 2: 0.00 0.00 0.00 0.00 0.00 0.00 0.00 0.00 0.00 0.00

FRAG# 3: 100.00 100.00 99.99 100.00 100.00 100.00 100.00 100.00 100.00 100.00  
Net pop.(%) 100.00 100.00 99.99 99.99 100.00 100.00 100.00 100.00 100.00 99.99

OP( 1 & 2 ) 0.000 0.000 0.000 0.000 0.000 0.000 0.000 0.000 0.000 0.000  
OP( 1 & 3 ) 0.000 0.000 0.000 0.000 0.000 0.000 0.000 0.000 0.000 0.000  
OP( 2 & 3 ) 0.000 0.000 0.000 0.000 0.000 0.000 0.000 0.000 0.000 0.000

Alpha MO: 61 62 63 64 65 66 67 68 69 70  
Energy(eV): -278.97 -278.83 -122.63 -121.99 -82.14 -81.57 -80.98 -80.93 -80.86 -80.67  
Symmetry: A A A A A A A A A A

FRAG# 1: 0.00 0.00 100.14 100.18 99.90 99.87 99.77 99.93 99.91 99.90  
Net pop.(%) 0.00 0.00 100.28 100.37 99.82 99.76 99.61 99.88 99.84 99.83

FRAG# 2: 0.00 0.00 0.00 0.00 0.05 0.03 0.10 0.03 0.01 0.01

FRAG# 3: 99.99 100.00 -0.14 -0.18 0.05 0.10 0.12 0.04 0.08 0.08  
Net pop.(%) 99.99 100.00 0.00 0.01 0.02 0.02 0.06 0.01 0.01 0.01

OP( 1 & 2 ) 0.000 0.000 0.000 0.000 0.001 0.001 0.002 0.001 0.000 0.000  
OP( 1 & 3 ) 0.000 0.000 -0.003 -0.004 0.001 0.002 0.001 0.001 0.001 0.001  
OP( 2 & 3 ) 0.000 0.000 0.000 0.000 0.000 0.000 0.000 0.000 0.000 0.000

Alpha MO: 71 72 73 74 75 76 77 78 79 80  
Energy(eV): -34.17 -33.94 -33.83 -33.20 -33.01 -31.25 -31.00 -28.96 -28.88 -27.55  
Symmetry: A A A A A A A A A A

FRAG# 1: -0.11 -0.88 -0.87 -0.67 -0.53 -0.83 -0.53 -0.54 -0.67 -0.18  
Net pop.(%) 0.98 0.07 0.06 0.06 0.05 0.09 0.04 0.14 0.14 0.04

FRAG# 2: 97.99 1.12 0.45 0.00 0.00 0.03 0.01 0.01 0.01 0.14  
Net pop.(%) 98.20 1.17 0.48 0.00 0.00 0.02 0.01 0.01 0.01 0.13

FRAG# 3: 2.11 99.76 100.42 100.67 100.53 100.80 100.52 100.53 100.66 100.04  
Net pop.(%) 1.32 100.69 101.33 101.40 101.11 101.71 101.09 101.21 101.47 100.24

OP( 1 & 2 ) -0.021 -0.001 -0.001 0.000 0.000 0.000 0.000 0.000 0.000 0.000  
OP( 1 & 3 ) -0.001 -0.018 -0.018 -0.015 -0.012 -0.018 -0.011 -0.014 -0.016 -0.004  
OP( 2 & 3 ) 0.017 0.000 0.000 0.000 0.000 0.000 0.000 0.000 0.000 0.000

Alpha MO: 81 82 83 84 85 86 87 88 89 90  
Energy(eV): -27.41 -27.02 -26.87 -26.66 -26.63 -26.58 -26.34 -26.33 -26.16 -25.92  
Symmetry: A A A A A A A A A A

FRAG# 1: -0.13 0.16 0.16 1.65 0.04 0.40 0.15 0.10 0.02 0.10  
Net pop.(%) 0.03 0.06 0.04 0.61 0.09 0.15 0.08 0.08 0.08 0.05

FRAG# 2: 0.11 0.33 0.04 81.29 2.99 10.37 0.05 1.41 0.35 0.01  
Net pop.(%) 0.10 0.32 0.04 79.60 2.93 10.25 0.06 1.43 0.36 0.01

FRAG# 3: 100.02 99.50 99.80 17.06 96.97 89.24 99.80 98.50 99.63 99.90  
Net pop.(%) 100.17 99.39 99.67 16.48 97.05 89.13 99.73 98.49 99.68 99.85

OP( 1 & 2 ) 0.000 0.000 0.000 0.022 0.001 0.003 0.000 0.000 0.000 0.000  
OP( 1 & 3 ) -0.003 0.002 0.002 -0.001 -0.002 0.002 0.001 0.000 -0.001 0.001  
OP( 2 & 3 ) 0.000 0.000 0.000 0.012 0.000 0.000 0.000 0.000 0.000 0.000

Alpha MO: 91 92 93 94 95 96 97 98 99 100  
Energy(eV): -25.79 -25.74 -25.44 -25.31 -23.78 -23.71 -22.71 -22.67 -22.64 -22.63  
Symmetry: A A A A A A A A A A

FRAG# 1: -0.27 -0.05 0.12 0.05 0.03 0.01 0.04 -0.07 0.11 0.15  
Net pop.(%) 0.03 0.02 0.02 0.03 0.06 0.05 0.12 0.02 0.08 0.09

FRAG# 2: 0.02 0.00 0.11 0.04 0.01 0.01 0.06 0.03 0.05 0.03  
Net pop.(%) 0.02 0.01 0.12 0.04 0.01 0.01 0.04 0.03 0.05 0.03

FRAG# 3: 100.25 100.05 99.76 99.91 99.96 99.98 99.89 100.04 99.83 99.82  
Net pop.(%) 100.55 100.13 99.69 99.88 99.98 100.03 99.95 100.13 99.79 99.77

OP( 1 & 2 ) 0.000 0.000 0.000 0.000 0.000 0.000 0.000 0.000 0.000 0.000  
OP( 1 & 3 ) -0.006 -0.001 0.002 0.000 -0.001 -0.001 -0.002 -0.002 0.001 0.001  
OP( 2 & 3 ) 0.000 0.000 0.000 0.000 0.000 0.000 0.000 0.000 0.000 0.000

Alpha MO: 101 102 103 104 105 106 107 108 109 110  
Energy(eV): -22.55 -22.52 -22.48 -22.39 -22.32 -22.28 -22.06 -21.99 -21.51 -21.44  
Symmetry: A A A A A A A A A A

FRAG# 1: 0.26 0.16 0.12 0.41 -0.05 0.02 -0.01 -0.01 0.28 0.42  
Net pop.(%) 0.07 0.04 0.05 0.13 0.01 0.01 0.12 0.06 0.15 0.15

FRAG# 2: 0.04 0.07 0.00 0.04 0.04 0.03 0.02 0.00 0.01 0.03  
Net pop.(%) 0.05 0.09 0.01 0.02 0.03 0.02 0.02 0.00 0.04 0.03

FRAG# 3: 99.70 99.78 99.87 99.55 100.01 99.95 99.99 100.01 99.71 99.55  
Net pop.(%) 99.51 99.67 99.81 99.26 100.07 99.93 100.11 100.08 99.55 99.28

OP( 1 & 2 ) 0.000 0.000 0.000 0.000 0.000 0.000 0.000 0.000 0.000 0.000  
OP( 1 & 3 ) 0.004 0.002 0.001 0.006 -0.001 0.000 -0.003 -0.001 0.003 0.005  
OP( 2 & 3 ) 0.000 0.000 0.000 0.000 0.000 0.000 0.000 0.000 0.000 0.000

Alpha MO: 111 112 113 114 115 116 117 118 119 120  
Energy(eV): -21.33 -21.17 -20.98 -20.84 -20.38 -20.35 -19.83 -19.80 -19.72 -19.50  
Symmetry: A A A A A A A A A A

FRAG# 1: 0.04 0.05 0.05 0.06 0.16 0.78 2.01 1.52 1.50 1.00  
Net pop.(%) 0.03 0.05 0.03 0.04 0.30 0.38 1.14 0.66 0.78 0.48

FRAG# 2: 0.00 0.01 0.00 0.01 0.20 0.52 0.08 0.19 0.04 0.11  
Net pop.(%) 0.00 0.00 0.00 0.01 0.20 0.37 0.06 0.14 0.02 0.08

FRAG# 3: 99.96 99.94 99.95 99.93 99.64 98.70 97.91 98.29 98.46 98.89  
Net pop.(%) 99.95 99.93 99.93 99.91 99.77 98.26 97.03 97.45 97.72 98.33

OP( 1 & 2 ) 0.000 0.000 0.000 0.000 0.000 0.001 0.000 0.001 0.000 0.000  
OP( 1 & 3 ) 0.000 0.000 0.000 0.000 -0.003 0.007 0.017 0.016 0.014 0.011  
OP( 2 & 3 ) 0.000 0.000 0.000 0.000 0.000 0.002 0.000 0.000 0.000 0.001

Alpha MO: 121 122 123 124 125 126 127 128 129 130  
Energy(eV): -19.45 -19.42 -18.74 -18.69 -18.48 -18.46 -18.24 -18.18 -17.88 -17.58  
Symmetry: A A A A A A A A A A

=====

|             |      |      |      |      |      |      |      |      |       |      |
|-------------|------|------|------|------|------|------|------|------|-------|------|
| FRAG# 1:    | 1.17 | 1.03 | 0.09 | 0.37 | 0.28 | 0.19 | 0.91 | 0.71 | 14.74 | 0.88 |
| Net pop.(%) | 0.47 | 0.38 | 0.06 | 0.23 | 0.19 | 0.13 | 0.60 | 0.42 | 11.70 | 0.55 |

-----

|             |      |      |      |      |      |      |      |      |       |      |
|-------------|------|------|------|------|------|------|------|------|-------|------|
| FRAG# 2:    | 0.16 | 0.12 | 0.05 | 0.15 | 0.18 | 0.17 | 2.10 | 0.93 | 61.91 | 4.29 |
| Net pop.(%) | 0.12 | 0.09 | 0.05 | 0.12 | 0.15 | 0.13 | 1.81 | 0.79 | 55.79 | 3.89 |

-----

|             |       |       |       |       |       |       |       |       |       |       |
|-------------|-------|-------|-------|-------|-------|-------|-------|-------|-------|-------|
| FRAG# 3:    | 98.67 | 98.85 | 99.86 | 99.48 | 99.53 | 99.64 | 97.00 | 98.36 | 23.35 | 94.83 |
| Net pop.(%) | 97.94 | 98.19 | 99.83 | 99.32 | 99.40 | 99.56 | 96.77 | 98.18 | 24.05 | 94.23 |

-----

|             |       |       |       |       |       |       |       |       |        |       |
|-------------|-------|-------|-------|-------|-------|-------|-------|-------|--------|-------|
| OP( 1 & 2 ) | 0.000 | 0.000 | 0.000 | 0.000 | 0.000 | 0.000 | 0.004 | 0.003 | 0.099  | 0.001 |
| OP( 1 & 3 ) | 0.014 | 0.013 | 0.001 | 0.003 | 0.002 | 0.001 | 0.002 | 0.003 | -0.038 | 0.005 |
| OP( 2 & 3 ) | 0.001 | 0.000 | 0.000 | 0.000 | 0.001 | 0.001 | 0.002 | 0.000 | 0.024  | 0.007 |

Alpha MO: 131 132 133 134 135 136 137 138 139 140  
Energy(eV): -17.47 -17.44 -17.33 -17.12 -17.04 -16.98 -16.93 -16.90 -16.73 -16.67  
Symmetry: A A A A A A A A A A

=====

|             |      |      |      |      |      |      |      |      |      |      |
|-------------|------|------|------|------|------|------|------|------|------|------|
| FRAG# 1:    | 2.12 | 0.90 | 1.23 | 0.39 | 0.92 | 1.96 | 0.89 | 4.91 | 0.61 | 1.32 |
| Net pop.(%) | 1.47 | 0.49 | 0.95 | 0.29 | 0.59 | 1.28 | 0.64 | 3.69 | 0.39 | 0.94 |

-----

|             |      |      |      |      |      |      |      |       |      |      |
|-------------|------|------|------|------|------|------|------|-------|------|------|
| FRAG# 2:    | 5.34 | 1.16 | 3.64 | 0.15 | 1.11 | 3.67 | 0.81 | 44.94 | 0.26 | 1.34 |
| Net pop.(%) | 4.89 | 1.10 | 3.52 | 0.13 | 0.98 | 3.49 | 0.78 | 42.98 | 0.25 | 1.17 |

-----

|             |       |       |       |       |       |       |       |       |       |       |
|-------------|-------|-------|-------|-------|-------|-------|-------|-------|-------|-------|
| FRAG# 3:    | 92.54 | 97.94 | 95.13 | 99.46 | 97.97 | 94.38 | 98.31 | 50.15 | 99.13 | 97.34 |
| Net pop.(%) | 92.03 | 97.57 | 95.24 | 99.36 | 97.63 | 93.76 | 98.09 | 48.70 | 98.90 | 96.94 |

-----

|             |       |       |        |       |       |       |       |       |       |       |
|-------------|-------|-------|--------|-------|-------|-------|-------|-------|-------|-------|
| OP( 1 & 2 ) | 0.006 | 0.001 | 0.005  | 0.000 | 0.001 | 0.002 | 0.000 | 0.017 | 0.000 | 0.001 |
| OP( 1 & 3 ) | 0.007 | 0.007 | 0.000  | 0.002 | 0.005 | 0.011 | 0.004 | 0.007 | 0.004 | 0.006 |
| OP( 2 & 3 ) | 0.003 | 0.000 | -0.003 | 0.000 | 0.001 | 0.001 | 0.000 | 0.022 | 0.000 | 0.002 |

Alpha MO: 141 142 143 144 145 146 147 148 149 150  
HOMO-77 HOMO-76 HOMO-75 HOMO-74 HOMO-73 HOMO-72 HOMO-71 HOMO-70 HOMO-69 HOMO-68  
Energy(eV): -16.59 -16.58 -16.47 -16.44 -16.44 -16.35 -16.29 -16.25 -16.18 -16.12  
Symmetry: A A A A A A A A A A

=====

|             |      |      |      |      |      |      |      |      |      |      |
|-------------|------|------|------|------|------|------|------|------|------|------|
| FRAG# 1:    | 0.99 | 1.48 | 3.97 | 5.19 | 1.86 | 4.61 | 1.28 | 4.30 | 0.51 | 1.88 |
| Net pop.(%) | 0.69 | 1.15 | 3.00 | 3.77 | 1.17 | 3.41 | 0.88 | 3.10 | 0.27 | 1.18 |

-----

|             |       |      |      |       |      |       |      |       |      |      |
|-------------|-------|------|------|-------|------|-------|------|-------|------|------|
| FRAG# 2:    | 12.25 | 2.00 | 0.40 | 19.00 | 4.25 | 11.90 | 4.69 | 11.73 | 0.62 | 2.06 |
| Net pop.(%) | 11.70 | 1.79 | 0.36 | 17.16 | 3.92 | 11.57 | 4.66 | 11.44 | 0.59 | 2.06 |

-----

|             |       |       |       |       |       |       |       |       |       |       |
|-------------|-------|-------|-------|-------|-------|-------|-------|-------|-------|-------|
| FRAG# 3:    | 86.76 | 96.52 | 95.63 | 75.81 | 93.88 | 83.49 | 94.03 | 83.97 | 98.87 | 96.05 |
| Net pop.(%) | 86.28 | 96.14 | 94.73 | 74.53 | 93.18 | 82.90 | 93.98 | 83.45 | 98.63 | 95.59 |

-----

|             |       |       |       |       |       |        |        |        |       |        |
|-------------|-------|-------|-------|-------|-------|--------|--------|--------|-------|--------|
| OP( 1 & 2 ) | 0.004 | 0.002 | 0.001 | 0.020 | 0.003 | 0.010  | 0.004  | 0.010  | 0.000 | 0.002  |
| OP( 1 & 3 ) | 0.002 | 0.005 | 0.018 | 0.009 | 0.011 | 0.015  | 0.004  | 0.014  | 0.004 | 0.012  |
| OP( 2 & 3 ) | 0.007 | 0.003 | 0.000 | 0.017 | 0.003 | -0.003 | -0.003 | -0.004 | 0.000 | -0.002 |

Alpha MO: 151 152 153 154 155 156 157 158 159 160  
HOMO-67 HOMO-66 HOMO-65 HOMO-64 HOMO-63 HOMO-62 HOMO-61 HOMO-60 HOMO-59 HOMO-58  
Energy(eV): -16.04 -15.96 -15.94 -15.88 -15.82 -15.81 -15.78 -15.69 -15.66 -15.61  
Symmetry: A A A A A A A A A A

FRAG# 1: 4.13 0.77 1.30 2.30 25.33 2.38 1.68 0.57 2.84 1.27  
Net pop.(%) 3.37 0.64 0.99 1.87 22.35 1.98 1.33 0.45 2.40 1.00

FRAG# 2: 8.73 0.49 2.46 5.10 6.76 5.02 2.90 0.72 2.11 0.97  
Net pop.(%) 8.30 0.47 2.37 4.95 5.96 4.89 2.99 0.69 2.13 1.09

FRAG# 3: 87.15 98.74 96.23 92.59 67.91 92.61 95.42 98.71 95.05 97.76  
Net pop.(%) 87.01 98.67 96.00 92.61 65.81 92.68 95.40 98.70 94.86 97.65

OP( 1 & 2 ) 0.010 0.001 0.002 0.006 0.017 0.006 0.002 0.001 0.002 0.000  
OP( 1 & 3 ) 0.005 0.002 0.005 0.003 0.043 0.002 0.005 0.001 0.006 0.005  
OP( 2 & 3 ) -0.002 0.000 0.000 -0.003 -0.001 -0.003 -0.004 -0.001 -0.003 -0.003

Alpha MO: 161 162 163 164 165 166 167 168 169 170  
HOMO-57 HOMO-56 HOMO-55 HOMO-54 HOMO-53 HOMO-52 HOMO-51 HOMO-50 HOMO-49 HOMO-48  
Energy(eV): -15.49 -15.47 -15.37 -15.22 -15.13 -15.11 -15.04 -14.92 -14.78 -14.65  
Symmetry: A A A A A A A A A A

FRAG# 1: 1.31 4.04 8.43 4.64 3.31 6.90 1.36 22.52 22.02 0.77  
Net pop.(%) 1.00 3.42 7.55 3.57 2.74 4.83 1.02 17.67 17.78 0.62

FRAG# 2: 0.77 5.87 3.63 2.91 1.62 5.78 0.12 3.65 1.91 0.23  
Net pop.(%) 0.74 6.33 4.02 3.51 1.71 6.51 0.19 3.18 1.86 0.18

FRAG# 3: 97.92 90.09 87.94 92.45 95.07 87.33 98.52 73.83 76.07 99.01  
Net pop.(%) 97.71 90.36 87.65 92.00 94.84 85.75 98.15 69.81 71.94 98.83

OP( 1 & 2 ) 0.001 0.004 0.002 0.000 0.002 -0.002 -0.001 0.013 0.002 0.000  
OP( 1 & 3 ) 0.005 0.008 0.016 0.021 0.009 0.044 0.008 0.084 0.083 0.003  
OP( 2 & 3 ) -0.001 -0.014 -0.010 -0.012 -0.004 -0.012 0.000 -0.004 -0.001 0.001

Alpha MO: 171 172 173 174 175 176 177 178 179 180  
HOMO-47 HOMO-46 HOMO-45 HOMO-44 HOMO-43 HOMO-42 HOMO-41 HOMO-40 HOMO-39 HOMO-38  
Energy(eV): -14.58 -14.48 -14.40 -14.30 -14.21 -14.20 -14.10 -13.98 -13.95 -13.93  
Symmetry: A A A A A A A A A A

FRAG# 1: 0.89 4.65 28.32 0.78 0.81 0.75 0.86 9.81 14.39 3.70  
Net pop.(%) 0.75 4.08 25.54 0.60 0.73 0.58 0.70 8.68 12.87 3.36

FRAG# 2: 0.55 0.65 3.94 0.85 0.48 0.13 0.08 6.15 11.25 0.80  
Net pop.(%) 0.60 0.64 3.61 0.76 0.42 0.13 0.09 5.25 9.72 0.74

FRAG# 3: 98.56 94.70 67.75 98.38 98.71 99.12 99.06 84.03 74.36 95.50  
Net pop.(%) 98.54 94.28 65.09 98.19 98.68 98.96 98.92 83.27 73.77 95.31

OP( 1 & 2 ) 0.001 0.002 0.004 0.001 0.001 0.000 0.000 0.013 0.024 0.002  
OP( 1 & 3 ) 0.002 0.010 0.051 0.003 0.001 0.003 0.003 0.010 0.006 0.005  
OP( 2 & 3 ) -0.002 -0.001 0.002 0.001 0.000 0.000 0.000 0.005 0.006 -0.001

Alpha MO: 181 182 183 184 185 186 187 188 189 190  
HOMO-37 HOMO-36 HOMO-35 HOMO-34 HOMO-33 HOMO-32 HOMO-31 HOMO-30 HOMO-29 HOMO-28  
Energy(eV): -13.91 -13.82 -13.75 -13.64 -13.58 -13.49 -13.41 -13.38 -13.32 -13.27  
Symmetry: A A A A A A A A A A

FRAG# 1: 4.94 13.68 18.79 9.98 37.17 61.69 9.86 10.60 31.79 28.08  
Net pop.(%) 4.28 12.21 16.54 9.54 36.58 60.85 9.66 10.21 31.26 27.37

FRAG# 2: 4.82 1.55 1.69 1.04 1.59 2.41 1.36 1.15 1.11 2.34  
Net pop.(%) 4.13 1.34 1.59 0.97 1.72 2.68 1.58 1.09 1.30 2.41

FRAG# 3: 90.24 84.78 79.52 88.98 61.24 35.90 88.78 88.24 67.11 69.58  
Net pop.(%) 89.92 83.29 77.24 88.54 60.49 34.93 88.60 87.93 66.43 68.78

OP( 1 & 2 ) 0.010 0.002 0.001 0.001 -0.003 -0.004 -0.002 0.001 -0.003 -0.002  
OP( 1 & 3 ) 0.003 0.027 0.044 0.008 0.015 0.021 0.006 0.006 0.014 0.016  
OP( 2 & 3 ) 0.003 0.002 0.001 0.001 0.000 -0.001 -0.002 0.000 0.000 0.000

Alpha MO: 191 192 193 194 195 196 197 198 199 200  
HOMO-27 HOMO-26 HOMO-25 HOMO-24 HOMO-23 HOMO-22 HOMO-21 HOMO-20 HOMO-19 HOMO-18  
Energy(eV): -13.23 -13.20 -13.18 -13.12 -13.06 -13.03 -12.96 -12.95 -12.86 -12.83  
Symmetry: A A A A A A A A A A

FRAG# 1: 20.50 12.63 8.32 35.22 4.59 23.91 22.25 14.27 10.48 22.17  
Net pop.(%) 20.60 12.69 8.34 36.08 4.53 24.63 22.43 14.24 10.60 22.63

FRAG# 2: 1.29 0.85 0.90 2.90 0.15 1.42 1.65 0.60 0.26 0.48  
Net pop.(%) 1.70 0.94 1.11 3.67 0.20 2.09 2.14 1.03 0.35 0.60

FRAG# 3: 78.21 86.52 90.78 61.88 95.26 74.67 76.10 85.13 89.26 77.36  
Net pop.(%) 77.94 86.42 90.60 62.01 95.16 75.04 76.52 85.02 89.38 77.87

OP( 1 & 2 ) -0.008 -0.003 -0.004 -0.015 -0.001 -0.010 -0.002 -0.005 -0.001 -0.001  
OP( 1 & 3 ) 0.006 0.001 0.004 -0.002 0.002 -0.004 -0.001 0.006 -0.002 -0.008  
OP( 2 & 3 ) 0.000 0.001 0.000 0.000 0.000 -0.003 -0.007 -0.004 -0.001 -0.002

Alpha MO: 201 202 203 204 205 206 207 208 209 210  
HOMO-17 HOMO-16 HOMO-15 HOMO-14 HOMO-13 HOMO-12 HOMO-11 HOMO-10 HOMO-9 HOMO-8  
Energy(eV): -12.74 -12.72 -12.62 -12.56 -12.52 -12.44 -12.05 -11.89 -11.84 -11.80  
Symmetry: A A A A A A A A A A

FRAG# 1: 28.46 48.87 4.85 6.52 20.41 29.34 27.19 23.49 9.12 20.94  
Net pop.(%) 28.91 49.78 4.98 6.50 21.01 30.16 28.27 25.08 9.92 23.05

FRAG# 2: 1.46 3.75 0.70 1.28 3.47 8.38 1.19 7.99 1.54 4.66  
Net pop.(%) 1.60 4.31 0.95 1.93 3.81 9.04 1.23 8.35 1.84 5.39

FRAG# 3: 70.08 47.39 94.45 92.20 76.12 62.29 71.63 68.52 89.34 74.40  
Net pop.(%) 70.42 47.95 94.55 92.55 76.53 63.17 72.69 69.68 89.92 75.88

OP( 1 & 2 ) -0.002 -0.009 -0.003 -0.003 -0.005 -0.006 -0.001 -0.008 -0.005 -0.013  
OP( 1 & 3 ) -0.006 -0.009 0.000 0.003 -0.007 -0.010 -0.021 -0.024 -0.011 -0.029  
OP( 2 & 3 ) 0.000 -0.002 -0.002 -0.010 -0.001 -0.007 0.000 0.001 -0.001 -0.001



Alpha MO: 211 212 213 214 215 216 217 218 219 220  
HOMO-7 HOMO-6 HOMO-5 HOMO-4 HOMO-3 HOMO-2 HOMO-1 HOMO LUMO LUMO+1  
Energy(eV): -11.79 -11.67 -11.51 -11.48 -11.43 -11.30 -11.26 -10.88 -8.37 -7.05  
Symmetry: A A A A A A A A A A

=====

|             |      |       |       |      |       |      |       |       |       |      |
|-------------|------|-------|-------|------|-------|------|-------|-------|-------|------|
| FRAG# 1:    | 4.57 | 13.35 | 21.93 | 0.31 | 22.58 | 2.38 | 50.09 | 20.18 | 53.10 | 1.25 |
| Net pop.(%) | 5.26 | 14.68 | 24.38 | 0.41 | 25.79 | 2.73 | 55.59 | 24.78 | 64.11 | 2.35 |

-----

|             |      |       |      |      |      |      |      |       |       |      |
|-------------|------|-------|------|------|------|------|------|-------|-------|------|
| FRAG# 2:    | 1.14 | 12.76 | 1.26 | 0.03 | 8.27 | 0.81 | 3.82 | 68.41 | 33.65 | 0.08 |
| Net pop.(%) | 1.13 | 12.31 | 1.51 | 0.03 | 8.48 | 0.82 | 5.12 | 72.03 | 41.05 | 0.16 |

-----

|             |       |       |       |       |       |       |       |       |       |       |
|-------------|-------|-------|-------|-------|-------|-------|-------|-------|-------|-------|
| FRAG# 3:    | 94.28 | 73.89 | 76.80 | 99.66 | 69.16 | 96.81 | 46.08 | 11.41 | 13.25 | 98.67 |
| Net pop.(%) | 95.01 | 75.93 | 79.01 | 99.76 | 72.03 | 97.12 | 50.72 | 14.00 | 18.38 | 99.67 |

-----

|             |        |        |        |        |        |        |        |        |        |        |
|-------------|--------|--------|--------|--------|--------|--------|--------|--------|--------|--------|
| OP( 1 & 2 ) | 0.000  | 0.012  | -0.005 | 0.000  | -0.005 | -0.001 | -0.022 | -0.056 | -0.133 | -0.002 |
| OP( 1 & 3 ) | -0.014 | -0.038 | -0.044 | -0.002 | -0.059 | -0.006 | -0.088 | -0.036 | -0.087 | -0.020 |
| OP( 2 & 3 ) | 0.000  | -0.003 | 0.000  | 0.000  | 0.001  | 0.000  | -0.004 | -0.016 | -0.015 | 0.000  |

### C3 P DKH

Alpha MO: 1 2 3 4 5 6 7 8 9 10  
Energy(eV): -8885.2 -8885.1 -1079.9 -1079.7 -931.79 -931.49 -931.41 -931.38 -931.13 -931.13  
Symmetry: A A A A A A A A A A

FRAG# 1: 100.00 100.00 99.93 99.95 100.00 100.00 100.00 100.00 100.00 100.00  
Net pop.(%) 100.00 100.00 99.93 99.96 100.00 100.00 100.00 100.00 100.00 100.00

FRAG# 2: 0.00 0.00 0.01 0.01 0.00 0.00 0.00 0.00 0.00 0.00

FRAG# 3: 0.00 0.00 0.06 0.04 0.00 0.00 0.00 0.00 0.00 0.00  
Net pop.(%) 0.00 0.00 0.07 0.05 0.00 0.00 0.00 0.00 0.00 0.00

OP( 1 & 2 ) 0.000 0.000 0.000 0.000 0.000 0.000 0.000 0.000 0.000 0.000  
OP( 1 & 3 ) 0.000 0.000 0.000 0.000 0.000 0.000 0.000 0.000 0.000 0.000  
OP( 2 & 3 ) 0.000 0.000 0.000 0.000 0.000 0.000 0.000 0.000 0.000 0.000

Alpha MO: 11 12 13 14 15 16 17 18 19 20  
Energy(eV): -525.34 -525.20 -395.68 -395.65 -395.62 -395.35 -394.54 -394.47 -394.37 -394.36  
Symmetry: A A A A A A A A A A

FRAG# 1: 0.01 0.01 0.00 0.00 0.00 0.00 0.01 0.01 0.01 0.00

FRAG# 2: 99.99 100.00 0.00 0.00 0.00 0.00 0.00 0.00 0.00 0.00  
Net pop.(%) 99.98 99.99 0.00 0.00 0.00 0.00 0.00 0.00 0.00 0.00

FRAG# 3: 0.00 0.00 100.00 100.00 100.00 100.00 99.99 99.99 99.99 100.00  
Net pop.(%) 0.00 0.00 100.01 100.00 100.01 100.00 99.98 99.98 99.98 100.00

OP( 1 & 2 ) 0.000 0.000 0.000 0.000 0.000 0.000 0.000 0.000 0.000 0.000  
OP( 1 & 3 ) 0.000 0.000 0.000 0.000 0.000 0.000 0.000 0.000 0.000 0.000  
OP( 2 & 3 ) 0.000 0.000 0.000 0.000 0.000 0.000 0.000 0.000 0.000 0.000

Alpha MO: 21 22 23 24 25 26 27 28 29 30  
Energy(eV): -393.91 -393.87 -283.82 -283.78 -282.38 -282.23 -281.98 -281.82 -281.62 -281.61  
Symmetry: A A A A A A A A A A

FRAG# 1: 0.00 0.00 0.00 0.00 -0.02 -0.02 0.00 0.01 -0.01 -0.01

FRAG# 2: 0.00 0.00 0.00 0.00 0.00 0.00 0.00 0.00 0.00 0.00

FRAG# 3: 100.00 100.00 100.00 100.00 100.02 100.02 100.00 99.99 100.01 100.01  
Net pop.(%) 99.99 100.00 100.00 100.00 100.04 100.04 100.01 99.99 100.01 100.01

OP( 1 & 2 ) 0.000 0.000 0.000 0.000 0.000 0.000 0.000 0.000 0.000 0.000  
OP( 1 & 3 ) 0.000 0.000 0.000 0.000 0.000 0.000 0.000 0.000 0.000 0.000  
OP( 2 & 3 ) 0.000 0.000 0.000 0.000 0.000 0.000 0.000 0.000 0.000 0.000

Alpha MO: 31 32 33 34 35 36 37 38 39 40  
Energy(eV): -281.56 -281.37 -281.36 -281.31 -281.30 -281.27 -281.23 -281.19 -281.12 -281.07  
Symmetry: A A A A A A A A A A

FRAG# 1: 0.00 -0.01 -0.01 0.00 -0.01 -0.01 0.00 0.00 0.00 0.00

FRAG# 2: 0.00 0.00 0.00 0.00 0.00 0.00 0.00 0.00 0.00 0.00

FRAG# 3: 100.01 100.01 100.01 100.00 100.00 100.01 100.00 100.00 100.00 100.00  
Net pop.(%) 100.01 100.02 100.02 100.00 100.01 100.02 100.01 100.00 100.01 100.01

OP( 1 & 2 ) 0.000 0.000 0.000 0.000 0.000 0.000 0.000 0.000 0.000 0.000  
OP( 1 & 3 ) 0.000 0.000 0.000 0.000 0.000 0.000 0.000 0.000 0.000 0.000  
OP( 2 & 3 ) 0.000 0.000 0.000 0.000 0.000 0.000 0.000 0.000 0.000 0.000

Alpha MO: 41 42 43 44 45 46 47 48 49 50  
Energy(eV): -280.96 -280.94 -280.46 -280.45 -280.34 -280.21 -280.21 -280.14 -280.10 -279.90  
Symmetry: A A A A A A A A A A

FRAG# 1: 0.00 -0.01 0.00 0.00 0.00 0.00 0.00 0.00 0.00 0.00

FRAG# 2: 0.00 0.00 0.00 0.00 0.00 0.00 0.00 0.00 0.00 0.00

FRAG# 3: 100.00 100.01 100.00 99.99 100.00 100.00 100.00 100.00 100.00 100.00  
Net pop.(%) 100.01 100.02 99.99 99.99 100.00 100.00 100.00 100.00 100.00 100.00

OP( 1 & 2 ) 0.000 0.000 0.000 0.000 0.000 0.000 0.000 0.000 0.000 0.000  
OP( 1 & 3 ) 0.000 0.000 0.000 0.000 0.000 0.000 0.000 0.000 0.000 0.000  
OP( 2 & 3 ) 0.000 0.000 0.000 0.000 0.000 0.000 0.000 0.000 0.000 0.000

Alpha MO: 51 52 53 54 55 56 57 58 59 60  
Energy(eV): -279.47 -279.46 -279.35 -279.31 -279.30 -279.25 -279.21 -279.20 -279.09 -279.08  
Symmetry: A A A A A A A A A A

FRAG# 1: 0.00 0.00 0.01 0.00 0.00 0.00 0.00 0.00 0.00 0.00  
FRAG# 2: 0.00 0.00 0.00 0.00 0.00 0.00 0.00 0.00 0.00 0.00

FRAG# 3: 100.00 100.00 100.00 100.00 100.00 100.00 100.00 100.00 100.00 100.00  
Net pop.(%) 100.00 100.00 99.99 100.00 99.99 100.00 100.00 100.00 100.00 99.99

OP( 1 & 2 ) 0.000 0.000 0.000 0.000 0.000 0.000 0.000 0.000 0.000 0.000  
OP( 1 & 3 ) 0.000 0.000 0.000 0.000 0.000 0.000 0.000 0.000 0.000 0.000  
OP( 2 & 3 ) 0.000 0.000 0.000 0.000 0.000 0.000 0.000 0.000 0.000 0.000

Alpha MO: 61 62 63 64 65 66 67 68 69 70  
Energy(eV): -279.05 -278.92 -126.42 -125.74 -83.26 -82.67 -82.04 -81.99 -81.94 -81.73  
Symmetry: A A A A A A A A A A

FRAG# 1: 0.00 0.00 100.06 100.10 99.90 99.86 99.78 99.93 99.91 99.90  
Net pop.(%) 0.00 0.00 100.12 100.21 99.82 99.75 99.62 99.87 99.83 99.82

FRAG# 2: 0.00 0.00 0.01 0.01 0.05 0.03 0.10 0.03 0.01 0.01

FRAG# 3: 99.99 100.00 -0.07 -0.11 0.05 0.11 0.13 0.04 0.08 0.09  
Net pop.(%) 99.99 100.00 0.00 0.00 0.02 0.02 0.06 0.01 0.02 0.02

OP( 1 & 2 ) 0.000 0.000 0.000 0.000 0.001 0.001 0.002 0.001 0.000 0.000  
OP( 1 & 3 ) 0.000 0.000 -0.001 -0.002 0.001 0.002 0.001 0.001 0.001 0.001  
OP( 2 & 3 ) 0.000 0.000 0.000 0.000 0.000 0.000 0.000 0.000 0.000 0.000

Alpha MO: 71 72 73 74 75 76 77 78 79 80  
Energy(eV): -34.17 -33.97 -33.86 -33.23 -33.04 -31.27 -31.02 -28.98 -28.90 -27.57  
Symmetry: A A A A A A A A A A

FRAG# 1: 0.00 -0.89 -0.87 -0.70 -0.54 -0.83 -0.53 -0.53 -0.66 -0.19  
Net pop.(%) 0.97 0.07 0.06 0.06 0.05 0.09 0.04 0.13 0.14 0.04

FRAG# 2: 97.47 1.49 0.56 0.00 0.00 0.03 0.01 0.01 0.01 0.14  
Net pop.(%) 97.61 1.55 0.60 0.00 0.00 0.03 0.01 0.01 0.01 0.12

FRAG# 3: 2.53 99.40 100.31 100.70 100.54 100.81 100.52 100.52 100.64 100.05  
Net pop.(%) 1.72 100.33 101.21 101.45 101.14 101.71 101.08 101.19 101.44 100.26

OP( 1 & 2 ) -0.019 -0.001 -0.001 0.000 0.000 0.000 0.000 0.000 0.000 0.000  
OP( 1 & 3 ) 0.000 -0.018 -0.018 -0.015 -0.012 -0.018 -0.011 -0.013 -0.016 -0.004  
OP( 2 & 3 ) 0.016 0.000 0.000 0.000 0.000 0.000 0.000 0.000 0.000 0.000

Alpha MO: 81 82 83 84 85 86 87 88 89 90  
Energy(eV): -27.43 -27.03 -26.89 -26.66 -26.65 -26.59 -26.36 -26.34 -26.18 -25.94  
Symmetry: A A A A A A A A A A

FRAG# 1: -0.13 0.17 0.17 1.43 0.18 0.51 0.14 0.09 0.01 0.09  
Net pop.(%) 0.03 0.06 0.04 0.53 0.13 0.18 0.08 0.07 0.08 0.05

FRAG# 2: 0.10 0.31 0.04 71.77 8.46 14.31 0.04 1.56 0.35 0.01  
Net pop.(%) 0.09 0.30 0.04 70.26 8.30 14.13 0.05 1.58 0.36 0.01

FRAG# 3: 100.03 99.52 99.79 26.80 91.35 85.18 99.82 98.35 99.64 99.90  
Net pop.(%) 100.18 99.40 99.66 26.30 91.36 85.03 99.75 98.35 99.70 99.85

OP( 1 & 2 ) 0.000 0.000 0.000 0.019 0.002 0.004 0.000 0.000 0.000 0.000  
OP( 1 & 3 ) -0.003 0.002 0.003 -0.001 -0.001 0.003 0.001 0.000 -0.001 0.001  
OP( 2 & 3 ) 0.000 0.000 0.000 0.011 0.001 0.000 0.000 0.000 0.000 0.000

Alpha MO: 91 92 93 94 95 96 97 98 99 100  
Energy(eV): -25.81 -25.74 -25.45 -25.32 -23.79 -23.73 -22.72 -22.67 -22.65 -22.64  
Symmetry: A A A A A A A A A A

FRAG# 1: -0.27 -0.05 0.12 0.05 0.03 0.01 0.07 -0.06 0.11 0.15  
Net pop.(%) 0.03 0.02 0.02 0.03 0.06 0.06 0.13 0.03 0.08 0.10

FRAG# 2: 0.02 0.00 0.12 0.04 0.01 0.01 0.06 0.03 0.05 0.03  
Net pop.(%) 0.02 0.01 0.12 0.05 0.00 0.01 0.04 0.03 0.04 0.03

FRAG# 3: 100.25 100.06 99.77 99.91 99.96 99.98 99.87 100.03 99.84 99.81  
Net pop.(%) 100.56 100.14 99.69 99.89 99.99 100.03 99.91 100.11 99.79 99.75

OP( 1 & 2 ) 0.000 0.000 0.000 0.000 0.000 0.000 0.000 0.000 0.000 0.000  
OP( 1 & 3 ) -0.006 -0.001 0.002 0.000 -0.001 -0.001 -0.001 -0.002 0.001 0.001  
OP( 2 & 3 ) 0.000 0.000 0.000 0.000 0.000 0.000 0.000 0.000 0.000 0.000

Alpha MO: 101 102 103 104 105 106 107 108 109 110  
Energy(eV): -22.55 -22.52 -22.48 -22.40 -22.32 -22.29 -22.07 -21.99 -21.51 -21.44  
Symmetry: A A A A A A A A A A

FRAG# 1: 0.28 0.14 0.12 0.42 -0.05 0.02 -0.01 -0.01 0.29 0.43  
Net pop.(%) 0.08 0.04 0.05 0.13 0.01 0.01 0.12 0.06 0.15 0.16

FRAG# 2: 0.05 0.06 0.00 0.04 0.04 0.03 0.02 0.01 0.01 0.03  
Net pop.(%) 0.06 0.08 0.01 0.02 0.03 0.01 0.02 0.01 0.04 0.03

FRAG# 3: 99.68 99.80 99.88 99.54 100.02 99.95 99.99 100.01 99.70 99.54  
Net pop.(%) 99.48 99.70 99.82 99.25 100.08 99.93 100.11 100.08 99.55 99.26

OP( 1 & 2 ) 0.000 0.000 0.000 0.000 0.000 0.000 0.000 0.000 0.000 0.000  
OP( 1 & 3 ) 0.004 0.002 0.001 0.006 -0.001 0.000 -0.002 -0.001 0.003 0.006  
OP( 2 & 3 ) 0.000 0.000 0.000 0.000 0.000 0.000 0.000 0.000 0.000 0.000

Alpha MO: 111 112 113 114 115 116 117 118 119 120  
Energy(eV): -21.33 -21.18 -20.99 -20.85 -20.40 -20.36 -19.84 -19.81 -19.73 -19.51  
Symmetry: A A A A A A A A A A

FRAG# 1: 0.04 0.05 0.05 0.06 0.28 0.90 2.01 1.57 1.48 1.00  
Net pop.(%) 0.03 0.05 0.03 0.04 0.31 0.41 1.12 0.67 0.75 0.48

FRAG# 2: 0.00 0.01 0.00 0.01 0.22 0.56 0.08 0.20 0.04 0.10  
Net pop.(%) 0.00 0.00 0.00 0.01 0.21 0.39 0.06 0.14 0.02 0.07

FRAG# 3: 99.96 99.94 99.95 99.92 99.50 98.55 97.91 98.24 98.48 98.90  
Net pop.(%) 99.95 99.93 99.93 99.90 99.53 98.03 97.02 97.37 97.74 98.34

OP( 1 & 2 ) 0.000 0.000 0.000 0.000 0.000 0.001 0.000 0.001 0.000 0.000  
OP( 1 & 3 ) 0.000 0.000 0.000 0.000 -0.001 0.008 0.018 0.017 0.014 0.011  
OP( 2 & 3 ) 0.000 0.000 0.000 0.000 0.000 0.002 0.000 0.000 0.000 0.001

Alpha MO: 121 122 123 124 125 126 127 128 129 130  
Energy(eV): -19.46 -19.43 -18.74 -18.69 -18.48 -18.46 -18.25 -18.18 -17.89 -17.58  
Symmetry: A A A A A A A A A A

=====

|             |      |      |      |      |      |      |      |      |       |      |
|-------------|------|------|------|------|------|------|------|------|-------|------|
| FRAG# 1:    | 1.24 | 1.04 | 0.09 | 0.37 | 0.29 | 0.19 | 1.06 | 0.79 | 14.78 | 0.81 |
| Net pop.(%) | 0.49 | 0.39 | 0.06 | 0.22 | 0.19 | 0.13 | 0.69 | 0.47 | 11.47 | 0.50 |

-----

|             |      |      |      |      |      |      |      |      |       |      |
|-------------|------|------|------|------|------|------|------|------|-------|------|
| FRAG# 2:    | 0.18 | 0.13 | 0.05 | 0.14 | 0.18 | 0.17 | 2.43 | 1.10 | 60.34 | 3.72 |
| Net pop.(%) | 0.13 | 0.09 | 0.05 | 0.12 | 0.15 | 0.13 | 2.08 | 0.93 | 54.02 | 3.37 |

-----

|             |       |       |       |       |       |       |       |       |       |       |
|-------------|-------|-------|-------|-------|-------|-------|-------|-------|-------|-------|
| FRAG# 3:    | 98.59 | 98.83 | 99.86 | 99.49 | 99.53 | 99.64 | 96.51 | 98.11 | 24.89 | 95.47 |
| Net pop.(%) | 97.81 | 98.17 | 99.83 | 99.33 | 99.39 | 99.57 | 96.26 | 97.92 | 25.63 | 94.91 |

-----

|             |       |       |       |       |       |       |       |       |        |       |
|-------------|-------|-------|-------|-------|-------|-------|-------|-------|--------|-------|
| OP( 1 & 2 ) | 0.000 | 0.000 | 0.000 | 0.000 | 0.000 | 0.000 | 0.005 | 0.003 | 0.104  | 0.001 |
| OP( 1 & 3 ) | 0.015 | 0.013 | 0.001 | 0.003 | 0.002 | 0.001 | 0.003 | 0.003 | -0.037 | 0.005 |
| OP( 2 & 3 ) | 0.001 | 0.000 | 0.000 | 0.000 | 0.001 | 0.001 | 0.002 | 0.000 | 0.023  | 0.006 |

Alpha MO: 131 132 133 134 135 136 137 138 139 140  
Energy(eV): -17.47 -17.44 -17.33 -17.12 -17.04 -16.98 -16.93 -16.88 -16.73 -16.67  
Symmetry: A A A A A A A A A A

=====

|             |      |      |      |      |      |      |      |      |      |      |
|-------------|------|------|------|------|------|------|------|------|------|------|
| FRAG# 1:    | 2.02 | 0.92 | 1.19 | 0.38 | 0.87 | 1.95 | 0.86 | 4.88 | 0.60 | 1.30 |
| Net pop.(%) | 1.39 | 0.49 | 0.91 | 0.28 | 0.55 | 1.29 | 0.61 | 3.59 | 0.37 | 0.93 |

-----

|             |      |      |      |      |      |      |      |       |      |      |
|-------------|------|------|------|------|------|------|------|-------|------|------|
| FRAG# 2:    | 5.02 | 1.23 | 3.46 | 0.12 | 0.89 | 2.64 | 0.89 | 42.87 | 0.28 | 1.20 |
| Net pop.(%) | 4.58 | 1.16 | 3.33 | 0.10 | 0.77 | 2.51 | 0.86 | 40.95 | 0.27 | 1.05 |

-----

|             |       |       |       |       |       |       |       |       |       |       |
|-------------|-------|-------|-------|-------|-------|-------|-------|-------|-------|-------|
| FRAG# 3:    | 92.95 | 97.85 | 95.35 | 99.50 | 98.25 | 95.41 | 98.26 | 52.25 | 99.11 | 97.50 |
| Net pop.(%) | 92.45 | 97.47 | 95.48 | 99.40 | 97.91 | 94.79 | 98.03 | 50.65 | 98.88 | 97.11 |

-----

|             |       |       |        |       |       |       |       |       |       |       |
|-------------|-------|-------|--------|-------|-------|-------|-------|-------|-------|-------|
| OP( 1 & 2 ) | 0.006 | 0.001 | 0.005  | 0.000 | 0.001 | 0.002 | 0.001 | 0.016 | 0.000 | 0.001 |
| OP( 1 & 3 ) | 0.007 | 0.007 | 0.000  | 0.002 | 0.005 | 0.011 | 0.004 | 0.010 | 0.004 | 0.006 |
| OP( 2 & 3 ) | 0.003 | 0.000 | -0.003 | 0.000 | 0.001 | 0.001 | 0.000 | 0.022 | 0.000 | 0.002 |

Alpha MO: 141 142 143 144 145 146 147 148 149 150  
HOMO-77 HOMO-76 HOMO-75 HOMO-74 HOMO-73 HOMO-72 HOMO-71 HOMO-70 HOMO-69 HOMO-68  
Energy(eV): -16.59 -16.58 -16.47 -16.44 -16.43 -16.34 -16.29 -16.25 -16.18 -16.12  
Symmetry: A A A A A A A A A A

=====

|             |      |      |      |      |      |      |      |      |      |      |
|-------------|------|------|------|------|------|------|------|------|------|------|
| FRAG# 1:    | 1.04 | 1.39 | 3.84 | 3.72 | 2.75 | 4.57 | 1.14 | 4.51 | 0.52 | 1.79 |
| Net pop.(%) | 0.72 | 1.08 | 2.86 | 2.55 | 1.84 | 3.33 | 0.77 | 3.21 | 0.27 | 1.07 |

-----

|             |       |      |      |       |      |       |      |       |      |      |
|-------------|-------|------|------|-------|------|-------|------|-------|------|------|
| FRAG# 2:    | 13.47 | 1.85 | 0.23 | 10.69 | 9.24 | 13.31 | 4.16 | 13.81 | 0.70 | 2.11 |
| Net pop.(%) | 12.84 | 1.69 | 0.20 | 9.72  | 8.32 | 12.91 | 4.11 | 13.42 | 0.66 | 2.11 |

-----

|             |       |       |       |       |       |       |       |       |       |       |
|-------------|-------|-------|-------|-------|-------|-------|-------|-------|-------|-------|
| FRAG# 3:    | 85.49 | 96.77 | 95.93 | 85.59 | 88.01 | 82.12 | 94.70 | 81.68 | 98.78 | 96.10 |
| Net pop.(%) | 84.90 | 96.44 | 95.00 | 84.55 | 87.03 | 81.48 | 94.62 | 81.10 | 98.53 | 95.60 |

-----

|             |       |       |       |       |       |        |        |        |       |        |
|-------------|-------|-------|-------|-------|-------|--------|--------|--------|-------|--------|
| OP( 1 & 2 ) | 0.004 | 0.001 | 0.001 | 0.011 | 0.008 | 0.010  | 0.003  | 0.011  | 0.000 | 0.002  |
| OP( 1 & 3 ) | 0.003 | 0.005 | 0.019 | 0.012 | 0.010 | 0.015  | 0.004  | 0.015  | 0.005 | 0.012  |
| OP( 2 & 3 ) | 0.009 | 0.002 | 0.000 | 0.008 | 0.010 | -0.002 | -0.002 | -0.003 | 0.000 | -0.002 |

Alpha MO: 151 152 153 154 155 156 157 158 159 160  
HOMO-67 HOMO-66 HOMO-65 HOMO-64 HOMO-63 HOMO-62 HOMO-61 HOMO-60 HOMO-59 HOMO-58  
Energy(eV): -16.03 -15.96 -15.93 -15.87 -15.81 -15.80 -15.77 -15.69 -15.65 -15.60  
Symmetry: A A A A A A A A A A

FRAG# 1: 3.81 0.64 1.20 2.15 22.82 3.14 2.46 0.61 2.97 1.28  
Net pop.(%) 3.12 0.53 0.89 1.73 19.97 2.63 2.04 0.48 2.50 0.99

FRAG# 2: 9.25 0.48 2.49 5.25 6.15 6.11 3.46 0.92 2.29 1.14  
Net pop.(%) 8.75 0.47 2.38 5.07 5.53 5.91 3.48 0.89 2.31 1.24

FRAG# 3: 86.93 98.88 96.31 92.60 71.04 90.76 94.08 98.47 94.74 97.58  
Net pop.(%) 86.84 98.82 96.06 92.59 68.99 90.80 94.01 98.47 94.52 97.47

OP( 1 & 2 ) 0.011 0.001 0.002 0.006 0.014 0.007 0.003 0.002 0.002 0.001  
OP( 1 & 3 ) 0.003 0.002 0.004 0.002 0.043 0.003 0.005 0.001 0.007 0.005  
OP( 2 & 3 ) -0.001 0.000 0.001 -0.002 -0.002 -0.004 -0.004 -0.001 -0.003 -0.003

Alpha MO: 161 162 163 164 165 166 167 168 169 170  
HOMO-57 HOMO-56 HOMO-55 HOMO-54 HOMO-53 HOMO-52 HOMO-51 HOMO-50 HOMO-49 HOMO-48  
Energy(eV): -15.48 -15.47 -15.36 -15.22 -15.13 -15.12 -15.03 -14.91 -14.79 -14.65  
Symmetry: A A A A A A A A A A

FRAG# 1: 1.15 4.18 8.08 5.37 2.82 6.13 1.19 21.92 22.06 0.69  
Net pop.(%) 0.84 3.48 7.12 4.04 2.32 4.27 0.88 17.09 17.82 0.55

FRAG# 2: 0.60 6.39 4.17 3.30 1.37 6.78 0.09 3.60 1.83 0.23  
Net pop.(%) 0.56 6.84 4.57 4.03 1.43 7.48 0.15 3.15 1.80 0.18

FRAG# 3: 98.24 89.42 87.74 91.33 95.81 87.08 98.72 74.48 76.11 99.08  
Net pop.(%) 98.00 89.62 87.41 90.59 95.61 85.89 98.39 70.51 71.94 98.91

OP( 1 & 2 ) 0.001 0.005 0.002 -0.001 0.002 0.000 -0.001 0.013 0.001 0.000  
OP( 1 & 3 ) 0.005 0.010 0.017 0.028 0.008 0.038 0.007 0.083 0.084 0.003  
OP( 2 & 3 ) 0.000 -0.013 -0.010 -0.013 -0.003 -0.014 0.000 -0.004 0.000 0.001

Alpha MO: 171 172 173 174 175 176 177 178 179 180  
HOMO-47 HOMO-46 HOMO-45 HOMO-44 HOMO-43 HOMO-42 HOMO-41 HOMO-40 HOMO-39 HOMO-38  
Energy(eV): -14.57 -14.47 -14.38 -14.30 -14.21 -14.19 -14.09 -13.97 -13.93 -13.92  
Symmetry: A A A A A A A A A A

FRAG# 1: 0.75 3.45 28.18 0.91 0.72 0.70 0.73 5.07 12.84 2.82  
Net pop.(%) 0.63 2.99 25.21 0.70 0.65 0.54 0.58 4.39 11.35 2.55

FRAG# 2: 0.56 0.60 3.90 0.97 0.45 0.13 0.06 3.01 10.51 0.69  
Net pop.(%) 0.61 0.61 3.54 0.87 0.40 0.12 0.06 2.55 9.03 0.68

FRAG# 3: 98.69 95.95 67.92 98.12 98.83 99.17 99.21 91.93 76.66 96.49  
Net pop.(%) 98.69 95.63 65.09 97.92 98.80 99.02 99.07 91.42 76.03 96.38

OP( 1 & 2 ) 0.001 0.001 0.005 0.001 0.001 0.000 0.000 0.006 0.023 0.002  
OP( 1 & 3 ) 0.002 0.008 0.054 0.003 0.000 0.003 0.003 0.007 0.006 0.004  
OP( 2 & 3 ) -0.002 -0.002 0.002 0.001 0.000 0.000 0.000 0.003 0.006 -0.002

Alpha MO: 181 182 183 184 185 186 187 188 189 190  
HOMO-37 HOMO-36 HOMO-35 HOMO-34 HOMO-33 HOMO-32 HOMO-31 HOMO-30 HOMO-29 HOMO-28  
Energy(eV): -13.90 -13.81 -13.73 -13.62 -13.54 -13.43 -13.39 -13.36 -13.29 -13.24  
Symmetry: A A A A A A A A A A

FRAG# 1: 9.40 10.57 20.35 4.37 35.28 39.59 5.88 24.98 21.97 17.46  
Net pop.(%) 8.10 9.34 17.65 4.09 34.45 38.84 5.71 24.41 21.42 16.49

FRAG# 2: 9.86 1.86 1.59 0.81 1.43 1.47 0.95 1.90 0.43 1.24  
Net pop.(%) 8.45 1.61 1.47 0.71 1.57 1.60 1.15 1.87 0.51 1.14

FRAG# 3: 80.74 87.56 78.06 94.82 63.29 58.94 93.17 73.12 77.60 81.30  
Net pop.(%) 80.22 86.37 75.33 94.53 62.36 58.10 93.05 72.65 77.05 80.42

OP( 1 & 2 ) 0.022 0.003 0.001 0.001 -0.002 -0.002 -0.002 0.001 -0.001 0.002  
OP( 1 & 3 ) 0.004 0.022 0.053 0.005 0.019 0.017 0.005 0.010 0.012 0.018  
OP( 2 & 3 ) 0.006 0.002 0.002 0.001 0.000 0.000 -0.003 -0.001 -0.001 0.000

Alpha MO: 191 192 193 194 195 196 197 198 199 200  
HOMO-27 HOMO-26 HOMO-25 HOMO-24 HOMO-23 HOMO-22 HOMO-21 HOMO-20 HOMO-19 HOMO-18  
Energy(eV): -13.21 -13.18 -13.15 -13.08 -13.05 -12.99 -12.94 -12.92 -12.84 -12.79  
Symmetry: A A A A A A A A A A

FRAG# 1: 11.43 5.47 43.46 20.35 2.71 33.52 14.86 22.07 4.14 33.79  
Net pop.(%) 11.40 5.40 43.61 20.68 2.62 34.60 14.87 22.34 4.14 34.35

FRAG# 2: 0.69 0.27 3.68 1.56 0.09 2.51 1.76 1.09 0.22 0.32  
Net pop.(%) 0.92 0.27 4.28 2.03 0.11 3.53 2.32 1.69 0.33 0.39

FRAG# 3: 87.89 94.26 52.86 78.08 97.20 63.98 83.38 76.84 95.64 65.89  
Net pop.(%) 87.71 94.23 52.26 77.95 97.10 64.50 83.69 76.81 95.62 66.42

OP( 1 & 2 ) -0.004 0.000 -0.014 -0.009 0.000 -0.016 -0.002 -0.009 -0.001 -0.001  
OP( 1 & 3 ) 0.004 0.001 0.011 0.003 0.002 -0.006 0.002 0.003 0.001 -0.010  
OP( 2 & 3 ) -0.001 0.000 0.001 0.000 0.000 -0.005 -0.009 -0.003 -0.001 0.000

Alpha MO: 201 202 203 204 205 206 207 208 209 210  
HOMO-17 HOMO-16 HOMO-15 HOMO-14 HOMO-13 HOMO-12 HOMO-11 HOMO-10 HOMO-9 HOMO-8  
Energy(eV): -12.70 -12.65 -12.61 -12.55 -12.50 -12.39 -12.02 -11.86 -11.83 -11.78  
Symmetry: A A A A A A A A A A

FRAG# 1: 30.52 47.70 13.06 6.69 11.29 48.45 26.95 19.89 7.80 5.95  
Net pop.(%) 30.93 48.32 13.30 6.65 11.59 49.73 28.03 21.27 8.40 6.55

FRAG# 2: 1.23 2.85 1.32 1.44 0.97 10.92 1.42 5.62 0.96 2.37  
Net pop.(%) 1.48 2.82 1.67 2.16 1.13 11.90 1.45 5.96 1.12 2.37

FRAG# 3: 68.26 49.45 85.62 91.87 87.74 40.63 71.63 74.49 91.25 91.68  
Net pop.(%) 68.55 50.04 85.82 92.20 87.90 41.75 72.69 75.49 91.72 92.37

OP( 1 & 2 ) -0.004 0.000 -0.004 -0.004 -0.003 -0.011 -0.001 -0.007 -0.003 0.001  
OP( 1 & 3 ) -0.005 -0.012 -0.001 0.004 -0.003 -0.014 -0.021 -0.020 -0.009 -0.013  
OP( 2 & 3 ) -0.001 0.000 -0.003 -0.011 0.000 -0.008 0.000 0.000 0.000 -0.001

Alpha MO: 211 212 213 214 215 216 217 218 219 220  
HOMO-7 HOMO-6 HOMO-5 HOMO-4 HOMO-3 HOMO-2 HOMO-1 HOMO LUMO LUMO+1  
Energy(eV): -11.77 -11.65 -11.49 -11.48 -11.40 -11.29 -11.18 -10.81 -8.25 -7.05  
Symmetry: A A A A A A A A A A

=====

|             |       |       |       |      |       |      |       |       |       |      |
|-------------|-------|-------|-------|------|-------|------|-------|-------|-------|------|
| FRAG# 1:    | 24.99 | 15.47 | 21.18 | 0.36 | 28.97 | 2.94 | 54.44 | 20.90 | 54.51 | 1.28 |
| Net pop.(%) | 27.58 | 16.83 | 23.47 | 0.46 | 32.74 | 3.38 | 60.24 | 25.62 | 65.78 | 2.40 |

-----

|             |      |       |      |      |      |      |      |       |       |      |
|-------------|------|-------|------|------|------|------|------|-------|-------|------|
| FRAG# 2:    | 3.85 | 15.03 | 1.10 | 0.01 | 9.17 | 1.24 | 3.92 | 68.19 | 32.46 | 0.09 |
| Net pop.(%) | 4.80 | 14.52 | 1.29 | 0.01 | 9.52 | 1.26 | 5.27 | 71.87 | 39.96 | 0.18 |

-----

|             |       |       |       |       |       |       |       |       |       |       |
|-------------|-------|-------|-------|-------|-------|-------|-------|-------|-------|-------|
| FRAG# 3:    | 71.15 | 69.50 | 77.72 | 99.63 | 61.86 | 95.82 | 41.64 | 10.91 | 13.04 | 98.63 |
| Net pop.(%) | 72.81 | 71.65 | 79.85 | 99.73 | 65.19 | 96.19 | 46.54 | 13.53 | 18.31 | 99.64 |

-----

|             |        |        |        |        |        |        |        |        |        |        |
|-------------|--------|--------|--------|--------|--------|--------|--------|--------|--------|--------|
| OP( 1 & 2 ) | -0.019 | 0.013  | -0.004 | 0.000  | -0.008 | -0.001 | -0.023 | -0.058 | -0.135 | -0.002 |
| OP( 1 & 3 ) | -0.033 | -0.040 | -0.042 | -0.002 | -0.067 | -0.008 | -0.094 | -0.037 | -0.090 | -0.021 |
| OP( 2 & 3 ) | 0.000  | -0.003 | 0.000  | 0.000  | 0.001  | 0.000  | -0.004 | -0.016 | -0.015 | 0.000  |
